# Supplementary material for: Discovery of the First Highly Selective Antagonist of the GluK3 Kainate Receptor Subtype
Source: MDPI journal article supplement (doi:10.3390/ijms23158797), 2022-08-08

## **Discovery of the first highly selective antagonist of the GluK3 kainate receptor subtype**

Paulina Chałupnik <sup>1</sup>, Alina Vialko <sup>1</sup>, Darryl S. Pickering <sup>2</sup>, Markus Hinkkanen <sup>2</sup>, Stephanie Donbosco <sup>2</sup>, Thor C. Møller <sup>2</sup>, Anders A. Jensen <sup>2</sup>, Birgitte Nielsen <sup>2</sup>, Yasmin Bay <sup>2</sup>, Anders S. Kristensen <sup>2</sup>, Tommy N. Johansen <sup>2</sup>, Kamil Łątka <sup>3</sup>, Marek Bajda <sup>3</sup> and Ewa Szymańska <sup>1,\*</sup>

<sup>1</sup> *Department of Technology and Biotechnology of Drugs, Jagiellonian University Medical College in Kraków, PL 30-688 Kraków, Poland*

<sup>2</sup> *Department of Drug Design and Pharmacology, Faculty of Health and Medical Sciences, University of Copenhagen, DK-2100 Copenhagen, Denmark*

<sup>3</sup> *Department of Physicochemical Drug Analysis, Jagiellonian University Medical College in Kraków, PL 30-688 Kraków, Poland*

\* *Correspondence: ewa.szymanska@uj.edu.pl*

## **Table of Contents**

|                                                                      |           |
|----------------------------------------------------------------------|-----------|
| <b>ANALYTICAL CHARACTERIZATION OF THE FINAL COMPOUNDS 5-29 .....</b> | <b>2</b>  |
| <b>SUPPLEMENTARY FIGURES .....</b>                                   | <b>10</b> |
| <b>NMR SPECTRA .....</b>                                             | <b>13</b> |

## Analytical characterization of the final compounds **5-29**

### *N*-(2,3-dioxo-6-(*m*-tolylethynyl)-3,4-dihydroquinoxalin-1(2*H*)-yl)benzamide (**5**)

Yield: 58%, mp. 318-320°C Anal. for C<sub>24</sub>H<sub>17</sub>N<sub>3</sub>O<sub>3</sub>: Calc.: C, 72.90; H, 4.33; N, 10.63. Found: C, 72.69; H, 4.43; N, 10.39. **LC/MS**: purity 100%,  $t_{\text{ret}}$  = 6.84 min,  $m/z$  396.29 [M<sup>+</sup>+1]. **<sup>1</sup>H NMR** (500 MHz, DMSO-*d*<sub>6</sub>)  $\delta$  2.29 (s, 3H, CH<sub>3</sub>), 7.21 (d,  $J$  = 7.6 Hz, 1H, Ar), 7.28 (t,  $J$  = 7.6 Hz, 1H, Ar), 7.31 – 7.39 (m, 5H, Ar), 7.57 (t,  $J$  = 8.4 Hz, 2H, Ar), 7.66 (tt,  $J$  = 7.6, 1.3 Hz, 1H, Ar), 8.01 (dd,  $J$  = 7.0, 1.4 Hz, 2H, Ar), 11.73 (s, 1H, NH), 12.43 (s, 1H, NH). **<sup>13</sup>C NMR** (126 MHz, DMSO-*d*<sub>6</sub>)  $\delta$  21.2 (CH<sub>3</sub>), 88.6 (C $\equiv$ C), 90.2 (C $\equiv$ C), 115.0, 118.6, 118.7, 122.4, 125.2, 127.4, 128.5, 128.7, 129.0, 129.2, 129.3, 130.3, 131.7, 132.4, 133.4, 138.7, 154.0 (C=O), 154.6 (C=O), 165.9 (C=O).

### *N*-(2,3-dioxo-6-(*p*-tolylethynyl)-3,4-dihydroquinoxalin-1(2*H*)-yl)benzamide (**6**)

Yield: 61%, mp. 325-327°C Anal. for C<sub>24</sub>H<sub>17</sub>N<sub>3</sub>O<sub>3</sub>: Calc.: C, 72.90; H, 4.33; N, 10.63. Found: C, 73.01; H, 4.28; N, 10.74. **LC/MS**: purity 100%,  $t_{\text{ret}}$  = 6.86 min,  $m/z$  396.25 [M<sup>+</sup>+1]. **<sup>1</sup>H NMR** (500 MHz, DMSO-*d*<sub>6</sub>)  $\delta$  2.30 (s, 3H, CH<sub>3</sub>), 7.20 (d,  $J$  = 8.0 Hz, 2H, Ar), 7.30 – 7.32 (m, 2H, Ar), 7.34 (s, 1H, Ar), 7.43 (d,  $J$  = 7.8 Hz, 2H, Ar), 7.57 (t,  $J$  = 7.8 Hz, 2H, Ar), 7.66 (tt,  $J$  = 7.7, 1.4 Hz, 1H, Ar), 8.01 (d,  $J$  = 7.2 Hz, 2H, Ar), 11.73 (br. s, 1H, NH), 12.42 (br. s, 1H). **<sup>13</sup>C NMR** (126 MHz, DMSO-*d*<sub>6</sub>)  $\delta$  21.6 (CH<sub>3</sub>), 88.3 (C $\equiv$ C), 90.2 (C $\equiv$ C), 115.0, 118.5, 118.8, 119.5, 125.2, 127.3, 128.5, 128.6, 129.3, 130.0, 131.6, 131.9, 133.4, 139.3, 154.0 (C=O), 154.6 (C=O), 165.9 (C=O).

### *N*-(6-((4-ethylphenyl)ethynyl)-2,3-dioxo-3,4-dihydroquinoxalin-1(2*H*)-yl)benzamide (**7**)

Yield: 78%, mp. 308-310°C Anal. for C<sub>25</sub>H<sub>19</sub>N<sub>3</sub>O<sub>3</sub> x 0.5 H<sub>2</sub>O: Calc.: C, 71.76; H, 4.82; N, 10.04. Found: C, 71.88; H, 4.76; N, 9.80. **LC/MS**: purity 100%,  $t_{\text{ret}}$  = 7.28 min,  $m/z$  410.32 [M<sup>+</sup>+1]. **<sup>1</sup>H NMR** (500 MHz, DMSO-*d*<sub>6</sub>)  $\delta$  1.15 (t,  $J$  = 7.6 Hz, 3H, CH<sub>2</sub>CH<sub>3</sub>), 2.60 (q,  $J$  = 7.6 Hz, 2H, CH<sub>2</sub>CH<sub>3</sub>), 7.24 (d,  $J$  = 8.2 Hz, 2H, Ar), 7.31 – 7.32 (m, 2H), 7.34 (s, 1H), 7.46 (d,  $J$  = 8.2 Hz, 2H, Ar), 7.57 (t,  $J$  = 7.9 Hz, 2H, Ar), 7.66 (tt,  $J$  = 7.4, 1.9 Hz, 1H, Ar), 8.01 (dd,  $J$  = 7.2, 1.4 Hz, 2H, Ar), 11.83 (br. s, 1H, NH), 12.32 (br. s, 1H, NH). **<sup>13</sup>C NMR** (126 MHz, DMSO-*d*<sub>6</sub>)  $\delta$  15.8 (CH<sub>2</sub>CH<sub>3</sub>), 28.6 (CH<sub>2</sub>CH<sub>3</sub>), 88.3 (C $\equiv$ C), 90.2 (C $\equiv$ C), 115.0, 118.6, 118.8, 119.8, 125.2, 127.3, 128.5, 128.7, 128.8, 129.3, 131.7, 132.0, 133.4, 145.5, 154.0 (C=O), 154.6 (C=O), 165.8 (C=O).

*N*-(2,3-dioxo-6-((4-propylphenyl)ethynyl)-3,4-dihydroquinoxalin-1(2H)-yl)benzamide (**8**)

Yield: 63%, mp. 305-306°C Anal. for C<sub>26</sub>H<sub>19</sub>N<sub>3</sub>O<sub>3</sub> x 0.5 H<sub>2</sub>O: Calc.: C, 72.21; H, 5.13; N, 9.72. Found: C, 72.45; H, 5.10; N, 9.66. **LC/MS**: purity 100%, *t*<sub>ret</sub> = 7.77 min, *m/z* 424.21 [M<sup>+</sup>+1]. **<sup>1</sup>H NMR** (500 MHz, DMSO-*d*<sub>6</sub>) δ 0.85 (t, *J* = 7.3 Hz, 3H, CH<sub>2</sub>CH<sub>2</sub>CH<sub>3</sub>), 1.50 – 1.61 (m, 2H, CH<sub>2</sub>CH<sub>2</sub>CH<sub>3</sub>), 2.55 (t, *J* = 7.6 Hz, 2H, CH<sub>2</sub>CH<sub>2</sub>CH<sub>3</sub>), 7.21 (d, *J* = 7.8 Hz, 2H, Ar), 7.29 – 7.35 (m, 3H), 7.45 (d, *J* = 7.8 Hz, 2H, Ar), 7.57 (t, *J* = 7.6 Hz, 2H, Ar), 7.66 (t, *J* = 7.4 Hz, 1H, Ar), 8.01 (d, *J* = 7.6 Hz, 2H, Ar), 11.72 (br. s, 1H, NH), 12.42 (br. s, 1H, NH). **<sup>13</sup>C NMR** (126 MHz, DMSO-*d*<sub>6</sub>) δ 14.1 (CH<sub>2</sub>CH<sub>2</sub>CH<sub>3</sub>), 24.3 (CH<sub>2</sub>CH<sub>2</sub>CH<sub>3</sub>), 37.6 (CH<sub>2</sub>CH<sub>2</sub>CH<sub>3</sub>), 88.3 (C≡C), 90.2 (C≡C), 115.0, 118.6, 118.8, 119.8, 125.2, 127.3, 128.5, 128.7, 129.3, 129.3, 131.7, 131.9, 133.4, 143.9, 154.0 (C=O), 154.6 (C=O), 165.8 (C=O).

*N*-(6-((4-isopropylphenyl)ethynyl)-2,3-dioxo-3,4-dihydroquinoxalin-1(2H)-yl)benzamide (**9**)

Yield: 68%, mp. 263-264°C Anal. for C<sub>26</sub>H<sub>21</sub>N<sub>3</sub>O<sub>3</sub> x 1 H<sub>2</sub>O: Calc.: C, 70.74; H, 5.25; N, 9.52. Found: C, 70.43; H, 4.97; N, 9.44. **LC/MS**: purity 96.99%, *t*<sub>ret</sub> = 7.66 min, *m/z* 424.06 [M<sup>+</sup>+1]. **<sup>1</sup>H NMR** (500 MHz, DMSO-*d*<sub>6</sub>) δ 1.16 (d, *J* = 6.9 Hz, 6H, CH<sub>3</sub>), 2.82 – 2.93 (m, 1H, CH(CH<sub>3</sub>)<sub>2</sub>), 7.26 (d, *J* = 7.9 Hz, 2H, Ar), 7.28 – 7.36 (m, 3H, Ar), 7.46 (d, *J* = 7.8 Hz, 2H, Ar), 7.57 (t, *J* = 7.5 Hz, 2H, Ar), 7.66 (t, *J* = 7.5 Hz, 1H, Ar), 8.02 (d, *J* = 7.6 Hz, 2H, Ar), 11.74 (br. s, 1H, NH), 12.44 (br. s, 1H, NH). **<sup>13</sup>C NMR** (126 MHz, DMSO-*d*<sub>6</sub>) δ 24.1 (CH<sub>3</sub>), 33.9 (CH(CH<sub>3</sub>)<sub>2</sub>), 88.2 (C≡C), 90.2 (C≡C), 115.0, 118.6, 118.8, 119.9, 125.2, 127.3, 128.5, 128.7, 129.3, 131.7, 132.0, 133.4, 150.0, 154.0 (C=O), 154.6 (C=O), 165.8 (C=O).

*N*-(6-((4-chlorophenyl)ethynyl)-2,3-dioxo-3,4-dihydroquinoxalin-1(2H)-yl)benzamide (**10**)

Yield: 76%, mp. 326-327°C Anal. for C<sub>23</sub>H<sub>14</sub>ClN<sub>3</sub>O<sub>3</sub>: Calc.: C, 66.43; H, 3.39; N, 10.11. Found: C, 66.15; H, 3.50; N, 9.96. **LC/MS**: purity 100%, *t*<sub>ret</sub> = 7.01 min, *m/z* 416.36 [M<sup>+</sup>]. **<sup>1</sup>H NMR** (500 MHz, DMSO-*d*<sub>6</sub>) δ 7.33 – 7.34 (m, 2H, Ar), 7.36 (t, *J* = 1.2 Hz, 1H, Ar), 7.47 (dt, *J* = 8.6, 2.1 Hz, 2H, Ar), 7.53 – 7.60 (m, 4H, Ar), 7.66 (tt, *J* = 7.4, 1.8 Hz, 1H, Ar), 8.01 (dd, *J* = 7.5, 1.4 Hz, 2H), 11.73 (s, 1H, NH), 12.44 (s, 1H, NH). **<sup>13</sup>C NMR** (126 MHz, DMSO-*d*<sub>6</sub>) δ 88.9 (C≡C), 89.9 (C≡C), 115.0, 118.3, 118.7, 121.4, 125.3, 127.5, 128.5, 128.9, 129.3, 129.5, 131.6, 133.4, 133.7, 134.2, 154.0 (C=O), 154.5 (C=O), 165.9 (C=O).

*N*-(2,3-dioxo-6-((4-(trifluoromethyl)phenyl)ethynyl)-3,4-dihydroquinoxalin-1(2H)-yl)benzamide (**11**)

Yield: 63%, mp. 317-319°C Anal. for  $C_{24}H_{14}F_3N_3O_3 \times 1 H_2O$ : Calc.: C, 61.67; H, 3.19; N, 8.99. Found: C, 62.02; H, 3.19; N, 8.97. **LC/MS**: purity 100%,  $t_{ret}$  = 7.15 min,  $m/z$  450.19 [ $M^+ + 1$ ].  **$^1H$  NMR** (500 MHz, DMSO- $d_6$ )  $\delta$  7.33 – 7.44 (m, 3H, Ar), 7.57 (t,  $J$  = 7.7 Hz, 2H, Ar), 7.66 (t,  $J$  = 7.2 Hz, 1H, Ar), 7.73 – 7.80 (m, 4H, Ar), 8.01 (d,  $J$  = 7.2 Hz, 2H, Ar), 11.76 (s, 1H, NH), 12.46 (s, 1H, NH).  **$^{13}C$  NMR** (126 MHz, DMSO- $d_6$ )  $\delta$  88.5 (C $\equiv$ C), 91.4 (C $\equiv$ C), 115.1, 117.8, 118.9, 124.5, 125.3, 126.2, 126.9, 127.6, 128.6, 129.2, 129.3, 131.7, 132.7, 133.4, 154.0 (C=O), 154.5 (C=O), 165.8 (C=O).

*N*-(6-((4-methoxyphenyl)ethynyl)-2,3-dioxo-3,4-dihydroquinoxalin-1(2H)-yl)benzamide (**12**)

Yield: 76%, mp. 304-305°C Anal. for  $C_{24}H_{17}N_3O_4 \times 0.5 H_2O$ : Calc.: C, 68.57; H, 4.32; N, 9.99. Found: C, 68.80; H, 4.27; N, 9.87. **LC/MS**: purity 100%,  $t_{ret}$  = 6.30 min,  $m/z$  412.18 [ $M^+ + 1$ ].  **$^1H$  NMR** (500 MHz, DMSO- $d_6$ )  $\delta$  3.76 (s, 3H, CH<sub>3</sub>), 6.95 (dt,  $J$  = 8.8, 1.9 Hz, 2H, Ar), 7.29 – 7.31 (m, 2H, Ar), 7.31 – 7.33 (m, 1H), 7.48 (t,  $J$  = 8.8, 2.7 Hz, 2H, Ar), 7.56 (t,  $J$  = 7.3 Hz, 2H), 7.66 (tt,  $J$  = 7.5, 1.3 Hz, 1H), 8.01 (dd,  $J$  = 7.2, 1.3 Hz, 2H), 11.72 (br. s, 1H, NH), 12.41 (br. s, 1H, NH).  **$^{13}C$  NMR** (126 MHz, DMSO- $d_6$ )  $\delta$  55.8 (CH<sub>3</sub>), 87.5 (C $\equiv$ C), 90.2 (C $\equiv$ C), 114.4, 114.9, 115.0, 118.4, 119.1, 125.2, 127.2, 128.5, 128.5, 129.3, 131.7, 133.4, 133.6, 154.0 (C=O), 154.6 (C=O), 160.22 (C<sub>Ar</sub>-OCH<sub>3</sub>), 165.8 (C=O).

*N*-(2,3-dioxo-6-((4-phenoxyphenyl)ethynyl)-3,4-dihydroquinoxalin-1(2H)-yl)benzamide (**13**)

Yield: 75%, mp. 262-263°C, Anal. for  $C_{29}H_{19}N_3O_4 \times 1 H_2O$ : Calc.: C, 70.87; H, 4.31; N, 8.55. Found: C, 70.89; H, 4.18; N, 8.41. **LC/MS**: purity 100%,  $t_{ret}$  = 7.66 min,  $m/z$  474.14 [ $M^+ + 1$ ].  **$^1H$  NMR** (500 MHz, DMSO- $d_6$ )  $\delta$  6.97 (dt,  $J$  = 8.7, 2.0 Hz, 2H, Ar), 7.06 (dd,  $J$  = 7.6, 0.9 Hz, 2H, Ar), 7.18 (tt,  $J$  = 7.2, 1.1 Hz, 1H, Ar), 7.27 – 7.36 (m, 3H, Ar), 7.36 – 7.44 (m, 2H, Ar), 7.52 – 7.60 (m, 4H, Ar), 7.66 (tt,  $J$  = 7.3, 1.5 Hz, 1H, Ar), 8.01 (d,  $J$  = 7.2 Hz, 2H, Ar), 11.73 (br. s, 1H, NH), 12.43 (br. s, 1H, NH).  **$^{13}C$  NMR** (126 MHz, DMSO- $d_6$ )  $\delta$  88.2 (C $\equiv$ C), 89.7 (C $\equiv$ C), 115.0, 117.0, 118.5, 118.7, 120.1, 124.9, 125.2, 127.3, 128.5, 128.7, 129.3, 130.8, 131.7, 133.4, 134.0, 154.0 (C=O), 154.5 (C=O), 156.1, 158.1, 165.8 (C=O).

3-((1-benzamido-2,3-dioxo-1,2,3,4-tetrahydroquinoxalin-6-yl)ethynyl)benzoic acid (**14**)

Yield: 55%, mp. 310-312°C Anal. for  $C_{24}H_{15}N_3O_5$ : Calc.: C, 67.76; H, 3.55; N, 9.88. Found: C, 67.90; H, 3.71; N, 9.91. **LC/MS**: purity 96.28%,  $t_{ret}$  = 5.23 min,  $m/z$  426.35 [ $M^+ + 1$ ].  **$^1H$  NMR** (300 MHz, DMSO- $d_6$ )  $\delta$  7.36 – 7.39 (m, 2H, Ar), 7.41 (d,  $J$  = 1.6 Hz, 1H, Ar), 7.49 – 7.64 (m, 3H, Ar), 7.68 (tt,  $J$  = 7.4, 2.4, 1.3 Hz, 1H, Ar), 7.80 (dt,  $J$  = 8.1, 1.2 Hz, 1H, Ar), 7.95 (dt,  $J$  = 7.9, 1.6 Hz, 1H, Ar), 8.01 – 8.07 (m, 3H, Ar), 11.74 (br.s, 1H, NH), 12.46 (br. s, 1H, NH).

**<sup>13</sup>C NMR** (126 MHz, DMSO-*d*<sub>6</sub>) δ 89.0 (C≡C), 89.6 (C≡C), 115.0, 118.2, 118.7, 123.0, 125.3, 127.6, 128.5, 129.0, 129.3, 129.8, 130.1, 131.7, 132.0, 132.6, 133.4, 135.9, 154.0 (C=O), 154.5 (C=O), 165.9 (C=O), 167.1 (COOH).

*4-((1-benzamido-2,3-dioxo-1,2,3,4-tetrahydroquinoxalin-6-yl)ethynyl)benzoic acid (15)*

Yield: 64%, mp. 348-349°C Anal. for C<sub>24</sub>H<sub>15</sub>N<sub>3</sub>O<sub>5</sub> x 1.5 H<sub>2</sub>O: Calc.: C, 63.72; H, 4.01; N, 9.29. Found: C, 64.04; H, 4.21; N, 8.97. **LC/MS**: purity 97.78%, *t*<sub>ret</sub> = 5.04 min, *m/z* 424.09 [*M*<sup>+</sup>-1]. **<sup>1</sup>H NMR** (500 MHz, DMSO-*d*<sub>6</sub>) δ 7.32 – 7.40 (m, 3H, Ar), 7.57 (t, *J* = 7.7 Hz, 2H, Ar), 7.63 – 7.70 (m, 3H, Ar), 7.93 (d, *J* = 9.0 Hz, 2H, Ar), 8.01 (d, *J* = 7.3 Hz, 2H, Ar), 11.74 (s, 1H, NH), 12.46 (s, 1H, NH), 13.15 (br. s, 1H, COOH). **<sup>13</sup>C NMR** (126 MHz, DMSO-*d*<sub>6</sub>) δ 89.3 (C≡C), 91.5 (C≡C), 115.1, 118.0, 118.8, 125.3, 126.8, 127.6, 128.5, 129.1, 129.3, 130.1, 131.3, 131.6, 132.1, 133.4, 154.0 (C=O), 154.5 (C=O), 165.9 (C=O), 167.3 (COOH).

*N-(2,3-dioxo-6-((4-sulfamoylphenyl)ethynyl)-3,4-dihydroquinoxalin-1(2H)-yl)benzamide (16)*

Yield: 59%, mp. 303-305°C Anal. for C<sub>23</sub>H<sub>16</sub>N<sub>4</sub>O<sub>5</sub>S: Calc.: C, 59.99; H, 3.50; N, 12.17. Found: C, 60.11; H, 3.57; N, 12.38. **LC/MS**: purity 98.07%, *t*<sub>ret</sub> = 4.72 min, *m/z* 461.09 [*M*<sup>+</sup>+1]. **<sup>1</sup>H NMR** (500 MHz, DMSO-*d*<sub>6</sub>) δ 7.36 (s, 2H, Ar), 7.40 (s, 1H, Ar), 7.46 (s, 2H, SO<sub>2</sub>NH<sub>2</sub>), 7.56 (t, *J* = 7.5 Hz, 2H, Ar), 7.65 (t, *J* = 7.4 Hz, 1H, Ar), 7.74 (d, *J* = 8.0 Hz, 2H, Ar), 7.83 (d, *J* = 8.0 Hz, 2H, Ar), 8.02 (d, *J* = 7.6 Hz, 2H, Ar). **<sup>13</sup>C NMR** (126 MHz, DMSO-*d*<sub>6</sub>) δ 88.8 (C≡C), 91.3 (C≡C), 115.1, 117.8, 118.9, 125.4, 125.9, 126.6, 127.6, 128.5, 129.3, 131.8, 132.5, 133.3, 144.4, 154.0 (C=O), 154.6 (C=O), 165.9 (C=O).

*4-((1-benzamido-2,3-dioxo-1,2,3,4-tetrahydroquinoxalin-6-yl)ethynyl)benzenesulfonyl fluoride (17)*

Yield: 69%, mp. 319-320°C Anal. for C<sub>23</sub>H<sub>14</sub>FN<sub>3</sub>O<sub>5</sub>S x 2 H<sub>2</sub>O: Calc.: C, 55.31; H, 3.63; N, 8.41. Found: C, 55.46; H, 3.64; N, 8.44. **LC/MS**: purity 96.03%, *t*<sub>ret</sub> = 6.59 min, *m/z* 464.15 [*M*<sup>+</sup>]. **<sup>1</sup>H NMR** (500 MHz, DMSO-*d*<sub>6</sub>) δ 7.34 (d, *J* = 1.1 Hz, 2H, Ar), 7.36 (t, *J* = 1.2 Hz, 1H, Ar), 7.47 (dt, *J* = 8.5, 2.1 Hz, 2H, Ar), 7.53 – 7.60 (m, 4H, Ar), 7.66 (tt, *J* = 7.4, 1.3 Hz, 1H, Ar), 8.01 (dd, *J* = 6.9, 1.6 Hz, 2H, Ar), 11.73 (s, 1H, NH), 12.44 (s, 1H, NH). **<sup>13</sup>C NMR** (126 MHz, DMSO-*D*<sub>6</sub>) δ 88.0 (C≡C), 94.2 (C≡C), 115.2, 117.3, 119.1, 125.4, 127.9, 128.5, 129.31, 129.34, 129.6, 130.8, 131.3 (d, *J* = 23.9 Hz, C<sub>Ar</sub>-SO<sub>2</sub>F), 131.6, 133.4, 133.5, 154.0 (C=O), 154.5 (C=O), 165.9 (C=O).

*N-(6-((2-hydroxyphenyl)ethynyl)-2,3-dioxo-3,4-dihydroquinoxalin-1(2H)-yl)benzamide (18)*

Yield: 58%, mp. 349-351°C Anal. for  $C_{23}H_{15}N_3O_4 \times 0.5 H_2O$ : Calc.: C, 67.98; H, 3.97; N, 10.34. Found: C, 68.15; H, 3.93; N, 10.11. **LC/MS**: purity 100%,  $t_{ret}$  = 6.26 min,  $m/z$  398.18  $[M^+ + 1]$ .  **$^1H$  NMR** (500 MHz, DMSO- $d_6$ )  $\delta$  7.24 (t,  $J$  = 7.4 Hz, 1H, Ar), 7.30 (t,  $J$  = 7.7 Hz, 1H, Ar), 7.36 (s, 1H, OH), 7.41 (d,  $J$  = 8.6 Hz, 1H, Ar), 7.55 – 7.76 (m, 7H, Ar), 8.03 (d,  $J$  = 7.6 Hz, 2H, Ar), 11.75 (s, 1H, NH), 12.46 (s, 1H, NH).  **$^{13}C$  NMR** (126 MHz, DMSO- $D_6$ )  $\delta$  102.8, 111.7, 112.0, 115.3, 121.0, 121.8, 123.9, 125.3, 125.5, 126.6, 128.5, 128.7, 129.3, 131.7, 133.4, 154.0 (C=O), 154.60 (C=O), 154.6, 154.8, 165.9 (C=O).

*N*-(6-((3-hydroxyphenyl)ethynyl)-2,3-dioxo-3,4-dihydroquinoxalin-1(2H)-yl)benzamide (**19**)

Yield: 71%, mp. 313-314°C Anal. for  $C_{23}H_{15}N_3O_4 \times 1 H_2O$ : Calc.: C, 66.5; H, 4.12; N, 10.12. Found: C, 66.67; H, 4.20; N, 9.87. **LC/MS**: purity 100%,  $t_{ret}$  = 5.34 min,  $m/z$  398.18  $[M^+ + 1]$ .  **$^1H$  NMR** (300 MHz, DMSO- $d_6$ )  $\delta$  6.81 (ddd,  $J$  = 8.2, 2.5, 1.0 Hz, 1H, Ar), 6.86 – 6.93 (m, 1H, Ar), 6.97 (dt,  $J$  = 8.0, 1.0 Hz, 1H, Ar), 7.21 (t,  $J$  = 7.9 Hz, 1H, Ar), 7.33 (d,  $J$  = 1.0 Hz, 2H, Ar), 7.35 – 7.37 (m, 1H, Ar), 7.59 (tt,  $J$  = 7.2, 1.2 Hz, 2H, Ar), 7.68 (tt,  $J$  = 7.3, 1.5 Hz, 1H, Ar), 8.03 (dt,  $J$  = 6.9, 2.0 Hz, 2H, Ar), 9.69 (s, 1H, OH), 11.73 (br. s, 1H, NH), 12.39 (br. s, 1H, NH).  **$^{13}C$  NMR** (126 MHz, DMSO- $d_6$ )  $\delta$  88.3 (C $\equiv$ C), 90.2 (C $\equiv$ C), 115.0, 117.0, 118.3, 118.6, 118.7, 122.8, 123.4, 125.2, 127.4, 128.5, 128.7, 129.3, 130.5, 131.7, 133.4, 154.0 (C=O), 154.54 (C=O), 157.9 (C<sub>Ar</sub>-OH), 165.9 (C=O).

*N*-(6-((4-(hydroxymethyl)phenyl)ethynyl)-2,3-dioxo-3,4-dihydroquinoxalin-1(2H)-yl)benzamide (**20**)

Yield: 75%, mp. 298-300°C Anal. for  $C_{24}H_{17}N_3O_4 \times 2 H_2O$ : Calc.: C, 64.42; H, 4.73; N, 9.39. Found: C, 64.71; H, 4.58; N, 9.33. **LC/MS**: purity 98.77%,  $t_{ret}$  = 4.98 min,  $m/z$  412.26  $[M^+ + 1]$ .  **$^1H$  NMR** (300 MHz, DMSO- $d_6$ )  $\delta$  4.52 (d,  $J$  = 5.3 Hz, 2H,  $\underline{CH}_2$ OH), 5.27 (t,  $J$  = 5.7 Hz, 1H, OH), 7.32 – 7.39 (m, 5H, Ar), 7.52 (dt,  $J$  = 8.4, 1.9 Hz, 2H, Ar), 7.59 (tt,  $J$  = 7.0, 1.5 Hz, 2H, Ar), 7.68 (tt,  $J$  = 7.4, 1.4 Hz, 1H, Ar), 8.03 (dt,  $J$  = 7.1, 2.1 Hz, 2H, Ar), 11.73 (s, 1H, NH), 12.41 (s, 1H, NH).  **$^{13}C$  NMR** (126 MHz, DMSO- $d_6$ )  $\delta$  63.0 ( $\underline{CH}_2$ OH), 88.4 (C $\equiv$ C), 90.2 (C $\equiv$ C), 115.0, 118.6, 118.7, 120.7, 125.2, 127.2, 127.4, 128.5, 128.7, 129.3, 131.6, 131.8, 133.4, 144.2, 154.0 (C=O), 154.6 (C=O), 165.9 (C=O).

*N*-(6-((2-aminophenyl)ethynyl)-2,3-dioxo-3,4-dihydroquinoxalin-1(2H)-yl)benzamide (**21**)

Yield: 71%, mp. 303-305°C Anal. for  $C_{23}H_{16}N_4O_3 \times 1.5 H_2O$ : Calc.: C, 65.24; H, 4.52; N, 13.23. Found: C, 65.44; H, 4.61; N, 12.98. **LC/MS**: purity 100%,  $t_{ret}$  = 5.72 min,  $m/z$  397.24  $[M^+ + 1]$ .  **$^1H$  NMR** (500 MHz, DMSO- $d_6$ )  $\delta$  5.49 (s, 2H, NH<sub>2</sub>), 6.50 (t,  $J$  = 7.5 Hz, 1H, Ar), 6.69

(d,  $J = 8.0$  Hz, 1H, Ar), 7.05 (td,  $J = 8.6, 7.3, 1.7$  Hz, 1H, Ar), 7.21 (dd,  $J = 7.8, 1.6$  Hz, 1H, Ar), 7.31 (d,  $J = 8.5$  Hz, 1H, Ar), 7.35 – 7.43 (m, 2H, Ar), 7.57 (t,  $J = 7.7$  Hz, 2H, Ar), 7.66 (t,  $J = 7.3$  Hz, 1H, Ar), 8.01 (d,  $J = 7.2$  Hz, 2H, Ar), 11.71 (br. s, 1H, NH), 12.41 (br. s, 1H, NH).  $^{13}\text{C}$  NMR (126 MHz, DMSO- $d_6$ )  $\delta$  87.8 (C $\equiv$ C), 93.4 (C $\equiv$ C), 105.7, 114.6, 114.8, 116.4, 118.5, 119.5, 125.1, 127.4, 128.3, 128.5, 129.3, 130.5, 131.7, 132.4, 133.4, 150.3, 154.0 (C=O), 154.6 (C=O), 165.9 (C=O).

*N*-(6-((3-aminophenyl)ethynyl)-2,3-dioxo-3,4-dihydroquinoxalin-1(2H)-yl)benzamide (**22**)

Yield: 64%, mp. 274-275°C Anal. for  $\text{C}_{23}\text{H}_{16}\text{N}_4\text{O}_3 \times 0.5 \text{ H}_2\text{O}$ : Calc.: C, 72.21; H, 5.13; N, 9.72. Found: C, 72.21; H, 5.10; N, 9.66. **LC/MS**: purity 100%,  $t_{\text{ret}} = 4.76$  min,  $m/z$  397.24 [ $\text{M}^+ + 1$ ].  $^1\text{H}$  NMR (500 MHz, DMSO- $d_6$ )  $\delta$  5.20 (br. s, 2H, NH $_2$ ), 6.57 (d,  $J = 7.9$  Hz, 1H, Ar), 6.64 (d,  $J = 7.5$  Hz, 1H, Ar), 6.70 (s, 1H, Ar), 7.02 (t,  $J = 7.8$  Hz, 1H, Ar), 7.22 – 7.35 (m, 3H, Ar), 7.57 (t,  $J = 7.6$  Hz, 2H, Ar), 7.66 (t,  $J = 7.4$  Hz, 1H, Ar), 8.01 (d,  $J = 7.2$  Hz, 2H, Ar), 11.73 (s, 1H, NH), 12.42 (s, 1H, NH).  $^{13}\text{C}$  NMR (126 MHz, DMSO- $d_6$ )  $\delta$  87.5 (C $\equiv$ C), 91.0 (C $\equiv$ C), 114.9, 115.4, 116.8, 118.6, 118.9, 119.4, 122.6, 125.2, 127.3, 128.5, 128.6, 129.3, 129.8, 131.6, 133.4, 154.0 (C=O), 154.6 (C=O), 165.8 (C=O).

*N*-(6-((4-aminophenyl)ethynyl)-2,3-dioxo-3,4-dihydroquinoxalin-1(2H)-yl)benzamide (**23**)

Yield: 65%, mp. 312-314°C Anal. for  $\text{C}_{23}\text{H}_{16}\text{N}_4\text{O}_3 \times 1 \text{ H}_2\text{O}$ : Calc.: C, 66.66; H, 4.38; N, 13.52. Found: C, 66.54; H, 4.49; N, 13.31. **LC/MS**: purity 100%,  $t_{\text{ret}} = 4.93$  min,  $m/z$  396.85 [ $\text{M}^+ + 1$ ].  $^1\text{H}$  NMR (300 MHz, DMSO- $d_6$ )  $\delta$  5.57 (s, 2H, NH $_2$ ), 6.54 (dt,  $J = 8.6, 2.0$  Hz, 2H, Ar), 7.19 (dt,  $J = 8.6, 1.9$  Hz, 2H, Ar), 7.22 – 7.32 (m, 3H, Ar), 7.59 (tt,  $J = 8.3, 1.3$  Hz, 2H, Ar), 7.68 (tt,  $J = 7.4, 1.3$  Hz, 1H, Ar), 7.98 – 8.08 (m, 2H, Ar), 11.70 (s, 1H, NH), 12.38 (s, 1H, NH).  $^{13}\text{C}$  NMR (126 MHz, DMSO- $D_6$ )  $\delta$  86.1 (C $\equiv$ C), 92.1 (C $\equiv$ C), 108.2, 114.2, 114.9, 118.0, 119.9, 125.2, 126.9, 128.0, 128.5, 129.3, 131.7, 133.2, 133.4, 150.2, 154.0 (C=O), 154.6 (C=O), 165.8 (C=O).

*N*-(6-((4-(dimethylamino)phenyl)ethynyl)-2,3-dioxo-3,4-dihydroquinoxalin-1(2H)-yl)benzamide (**24**)

Yield: 71%, mp. 273-275°C Anal. for  $\text{C}_{19}\text{H}_{16}\text{N}_4\text{O}_3 \times 0.5 \text{ H}_2\text{O}$ : Calc.: C, 69.27; H, 4.88; N, 12.93. Found: C, 69.54; H, 4.67; N, 13.04. **LC/MS**: purity 100%,  $t_{\text{ret}} = 6.57$  min,  $m/z$  425.29 [ $\text{M}^+ + 1$ ].  $^1\text{H}$  NMR (500 MHz, DMSO- $d_6$ )  $\delta$  2.91 (s, 6H, CH $_3$ ), 6.67 (d,  $J = 9.0$  Hz, 2H, Ar), 7.20 – 7.31 (m, 3H, Ar), 7.33 (dt,  $J = 8.9, 1.9$  Hz, 2H, Ar), 7.57 (t,  $J = 7.3$  Hz, 2H, Ar), 7.66 (tt,  $J = 7.5, 1.2$  Hz, 1H, Ar), 8.01 (dd,  $J = 7.1, 1.4$  Hz, 2H, Ar), 11.71 (br. s, 1H, NH), 12.39 (br. s, 1H, NH).

**<sup>13</sup>C NMR** (126 MHz, DMSO-*d*<sub>6</sub>) δ 86.8 (C≡C), 91.7 (C≡C), 108.5, 112.0, 112.4, 114.9, 118.1, 119.7, 125.2, 126.9, 128.1, 128.5, 129.3, 131.7, 133.0, 133.2, 133.4, 150.8, 153.9 (C=O), 154.6 (C=O), 165.8 (C=O).

*N*-(2,3-dioxo-6-(pyridin-4-ylethynyl)-3,4-dihydroquinoxalin-1(2H)-yl)benzamide (**25**)

Yield: 77%, mp. 239-241°C Anal. for C<sub>22</sub>H<sub>14</sub>N<sub>4</sub>O<sub>3</sub> x 0.5 H<sub>2</sub>O: Calc.: C, 67.51; H, 3.86; N, 14.32.

Found: C, 67.67; H, 4.02; N, 14.11. **LC/MS**: purity 100%, *t*<sub>ret</sub> = 3.59 min, *m/z* 383.20 [M<sup>+</sup>+1].

**<sup>1</sup>H NMR** (500 MHz, DMSO-*d*<sub>6</sub>) δ 7.34 – 7.42 (m, 3H, Ar), 7.52 (d, *J* = 5.0 Hz, 2H, Ar), 7.57 (t, *J* = 7.6 Hz, 2H, Ar), 7.66 (t, *J* = 7.4 Hz, 1H, Ar), 8.01 (d, *J* = 7.6 Hz, 2H, Ar), 8.60 (d, *J* = 5.2 Hz, 2H, Ar), 11.81 (br. s, 1H, NH), 12.42 (br. s, 1H, NH). **<sup>13</sup>C NMR** (126 MHz, DMSO-*d*<sub>6</sub>) δ 87.4 (C≡C), 93.1 (C≡C), 115.1, 117.4, 119.0, 125.3, 125.9, 127.8, 128.5, 129.3, 129.5, 130.5, 131.6, 133.4, 150.5, 154.0 (C=O), 154.5 (C=O), 165.9 (C=O).

*N*-(6-((6-hydroxypyridin-3-yl)ethynyl)-2,3-dioxo-3,4-dihydroquinoxalin-1(2H)-yl)benzamide (**26**)

Yield: 64%, mp. 273-275°C Anal. for C<sub>22</sub>H<sub>14</sub>N<sub>4</sub>O<sub>4</sub> x 1 H<sub>2</sub>O: Calc.: C, 63.46; H, 3.87; N, 13.46.

Found: C, 63.54; H, 4.02; N, 13.67. **LC/MS**: purity 96.11%, *t*<sub>ret</sub> = 3.85 min, *m/z* 399.15 [M<sup>+</sup>+1].

**<sup>1</sup>H NMR** (500 MHz, DMSO-*d*<sub>6</sub>) δ 6.33 (d, *J* = 9.5 Hz, 1H, Ar), 7.23 – 7.33 (m, 3H, Ar), 7.51 (dd, *J* = 9.5, 2.6 Hz, 1H, Ar), 7.56 (t, *J* = 7.6 Hz, 2H, Ar), 7.66 (t, *J* = 7.4 Hz, 1H, Ar), 7.76 (d, *J* = 2.6 Hz, 1H, Ar), 8.00 (d, *J* = 7.1 Hz, 2H, Ar), 11.71 (s, 1H, NH), 11.97 (br. s, 1H, OH), 12.43 (s, 1H, NH). **<sup>13</sup>C NMR** (126 MHz, DMSO-*d*<sub>6</sub>) δ 86.7 (C≡C), 88.5 (C≡C), 100.6, 115.0, 118.3, 118.8, 120.7, 125.2, 127.1, 128.5, 128.5, 129.3, 131.6, 133.4, 140.6, 142.9, 143.1, 153.9 (C=O), 154.6 (C=O), 161.7 (C<sub>Ar</sub>-OH), 165.8 (C=O).

*N*-(2,3-dioxo-6-(pyrimidin-5-ylethynyl)-3,4-dihydroquinoxalin-1(2H)-yl)benzamide (**27**)

Yield: 74%, mp. 318-320°C Anal. for C<sub>21</sub>H<sub>13</sub>N<sub>5</sub>O<sub>3</sub> x 1.5 H<sub>2</sub>O: Calc.: C, 61.46; H, 3.93; N, 17.07.

Found: C, 61.68; H, 3.73; N, 17.21. **LC/MS**: purity 100%, *t*<sub>ret</sub> = 4.40 min, *m/z* 384.20 [M<sup>+</sup>+1].

**<sup>1</sup>H NMR** (500 MHz, DMSO-*d*<sub>6</sub>) δ 7.32 – 7.41 (m, 2H, Ar), 7.48 (d, *J* = 1.1 Hz, 1H, Ar), 7.55 (t, *J* = 7.4 Hz, 2H, Ar), 7.65 (tt, *J* = 7.4, 1.1 Hz, 1H, Ar), 8.04 (dd, *J* = 7.0, 1.5 Hz, 2H, Ar), 9.01 (s, 2H, Ar), 9.16 (s, 1H, Ar). **<sup>13</sup>C NMR** (126 MHz, DMSO-*d*<sub>6</sub>) δ 83.6 (C≡C), 95.1 (C≡C), 115.1, 117.4, 118.8, 125.3, 127.6, 128.5, 129.3, 129.4, 131.6, 133.4, 154.0 (C=O), 154.5 (C=O), 157.5, 159.3, 165.9 (C=O).



*N*-(6-(imidazo[1,2-*b*]pyridazin-3-ylethynyl)-2,3-dioxo-3,4-dihydroquinoxalin-1(2*H*)-yl)benzamide (**28**)

Yield: 79%, mp. 314-315°C Anal. for C<sub>23</sub>H<sub>14</sub>N<sub>6</sub>O<sub>3</sub> x 1 H<sub>2</sub>O: Calc.: C, 62.73; H, 3.66; N, 19.08. Found: C, 62.94; H, 3.84; N, 18.98. **LC/MS**: purity 100%, *t*<sub>ret</sub>= 4.40 min, *m/z* 423.08 [M<sup>+</sup>+1]. **<sup>1</sup>H NMR** (500 MHz, DMSO-*d*<sub>6</sub>) δ 7.33 – 7.39 (m, 3H, Ar), 7.41 (s, 1H, Ar), 7.57 (t, *J* = 7.6 Hz, 2H, Ar), 7.67 (t, *J* = 7.4 Hz, 1H, Ar), 8.01 (d, *J* = 7.2 Hz, 2H, Ar), 8.22 (d, *J* = 9.2 Hz, 2H, Ar), 8.67 (d, *J* = 4.4 Hz, 1H, Ar), 11.75 (s, 1H, NH), 12.45 (s, 1H, NH). **<sup>13</sup>C NMR** (126 MHz, DMSO-*d*<sub>6</sub>) δ 77.4 (C≡C), 97.7 (C≡C), 112.1, 115.1, 118.0, 118.4, 119.6, 125.4, 126.6, 127.1, 128.5, 129.1, 129.3, 131.6, 133.4, 139.0, 140.1, 145.5, 154.0 (C=O), 154.5 (C=O), 165.9 (C=O).

*N*-(6-((1*H*-pyrazolo[4,3-*b*]pyridin-5-yl)ethynyl)-2,3-dioxo-3,4-dihydroquinoxalin-1(2*H*)-yl)benzamide (**29**)

Yield: 65%, mp. Over 350°C Anal. for C<sub>23</sub>H<sub>14</sub>N<sub>6</sub>O<sub>3</sub> x 0.5 H<sub>2</sub>O: Calc.: C, 64.03; H, 3.50; N, 19.48. Found: C, 63.96; H, 3.51; N, 19.38. **LC/MS**: purity 100%, *t*<sub>ret</sub>= 4.31 min, *m/z* 423.14 [M<sup>+</sup>+1]. **<sup>1</sup>H NMR** (500 MHz, DMSO-*d*<sub>6</sub>) δ 7.34 – 7.44 (m, 3H, Ar), 7.54 – 7.62 (m, 3H, Ar), 7.67 (tt, *J* = 7.5, 1.2 Hz, 1H, Ar), 7.99 – 8.07 (m, 3H, Ar), 8.29 (s, 1H, Ar), 11.75 (s, 1H, NH), 12.48 (s, 1H, NH), 13.50 (s, 1H, NH). **<sup>13</sup>C NMR** (126 MHz, DMSO-*d*<sub>6</sub>) δ 86.8 (C≡C), 90.3 (C≡C), 115.1 (C≡C), 117.8, 118.9, 119.6, 124.9, 125.3, 127.7, 128.5, 129.2, 129.3, 131.6, 131.8, 133.4, 134.6, 137.7, 141.7, 150.5, 154.0 (C=O), 154.5 (C=O), 165.9 (C=O).

## Supplementary Figures

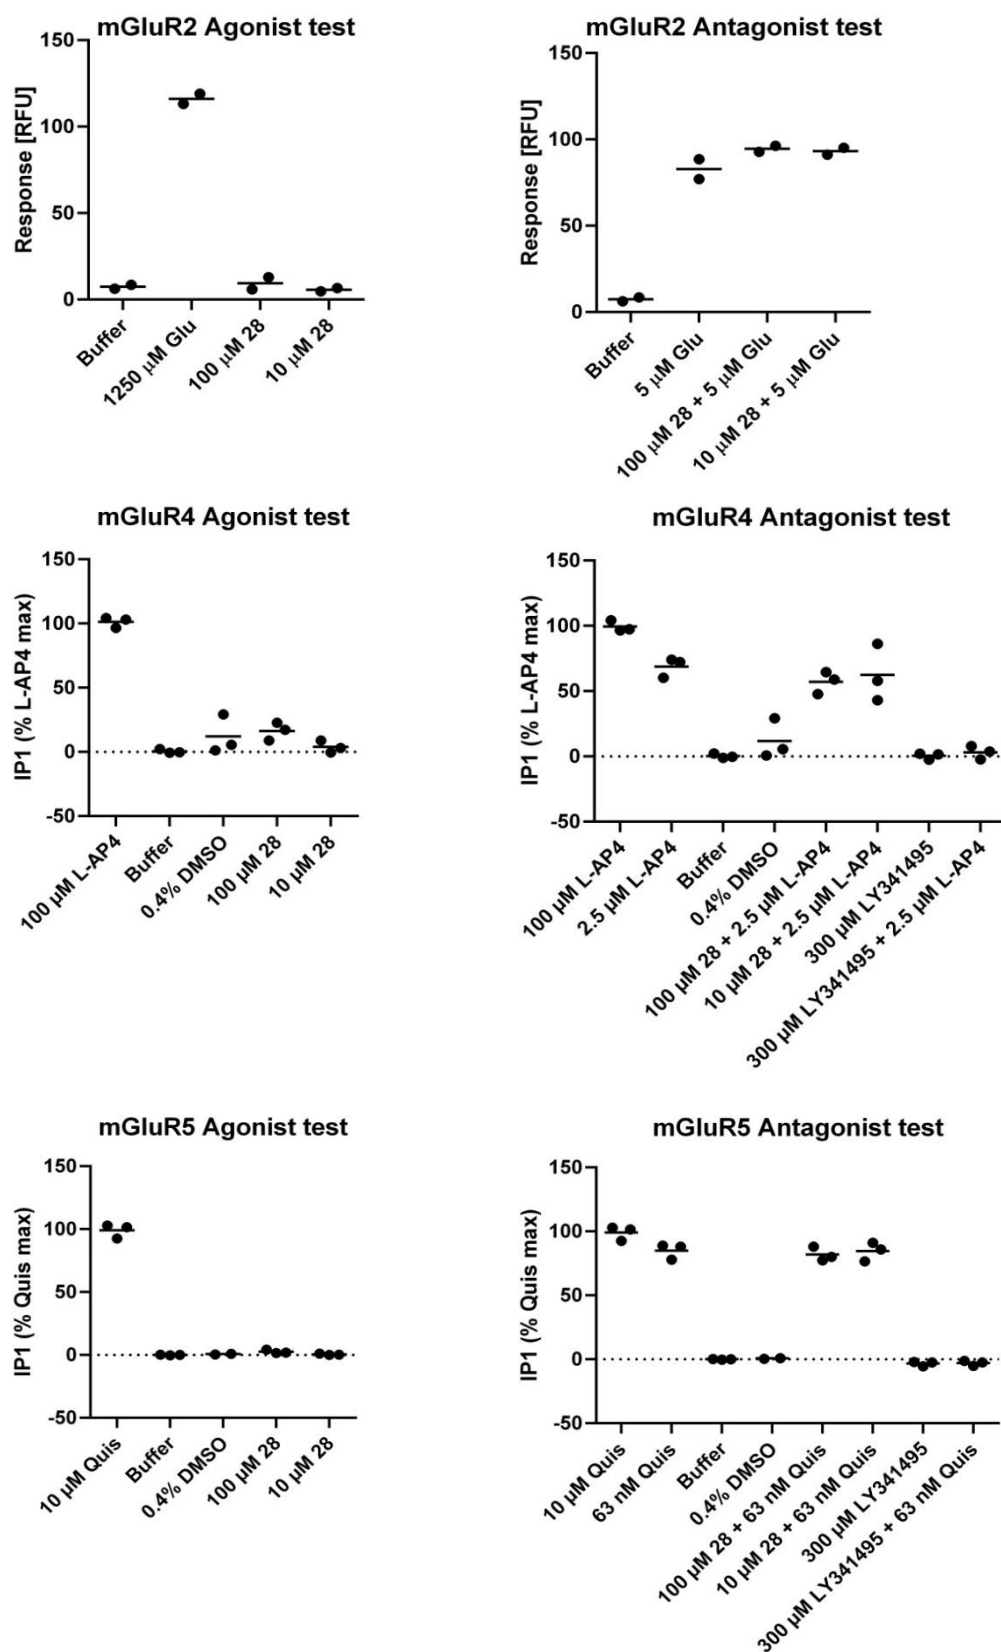

**Figure S1.** Functional testing of compound **28** at mGluR2,4,5. **28** exhibited neither agonistic nor antagonistic effects at the tested mGluR subtypes. Quis = quisqualic acid; Glu = L-glutamate.

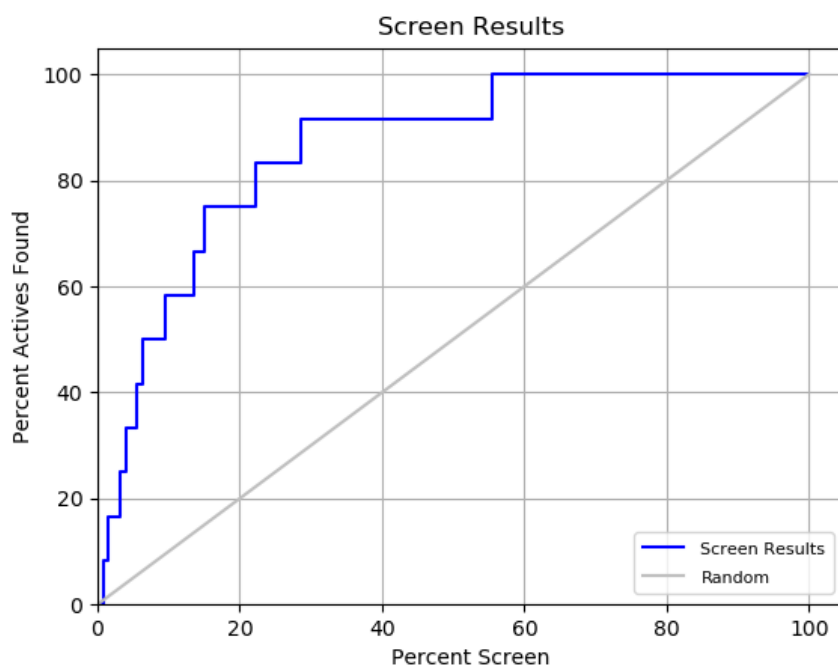

**Figure S2.** Enrichment plot for the GluK3-LBD homology mode built with the Modeller program, using the 6SBT crystal structure as a template.

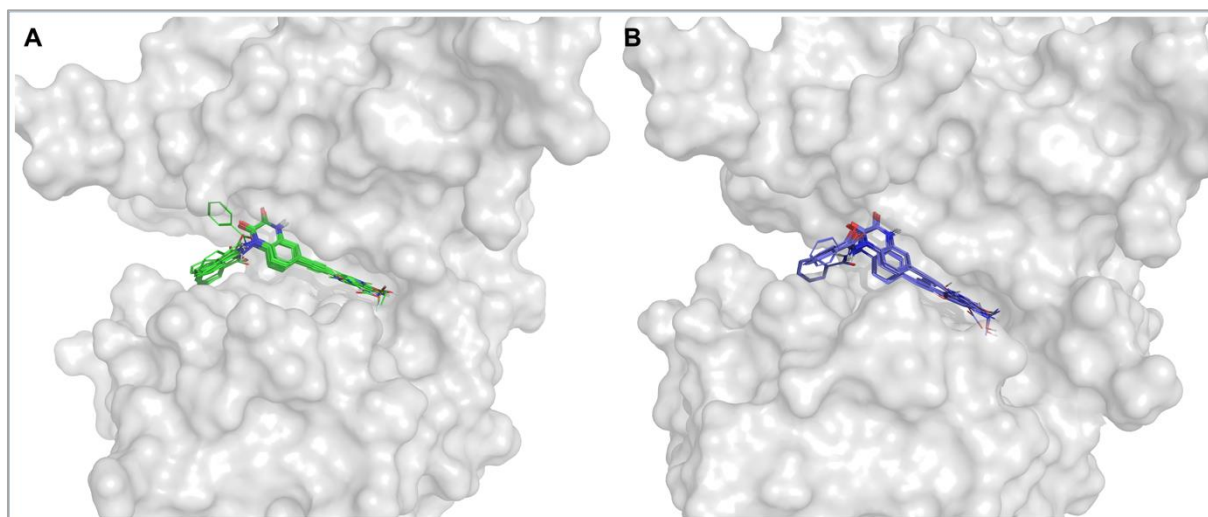

**Figure S3.** Comparison of the binding modes for the top-ranked docking poses of **5-29** in the GluK1-LBD X-ray structure (PDB code: 6SBT) (**A**) and the GluK3-LBD homology model (**B**).

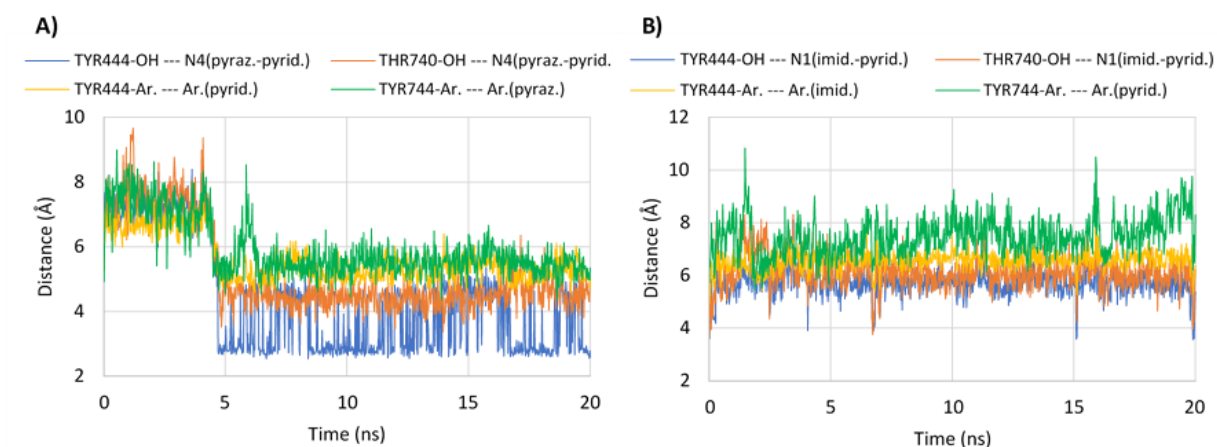

**Figure S4.** Distance changes between amino acid residues of the GluK1-LBD and nitrogen atoms/aromatic rings of the substituent at position 6 of compound **29** (A) and **28** (B), engaged in key interactions, during 20 ns molecular dynamics simulation. The distances between aromatic fragments were measured between the centroids of the indicated rings.

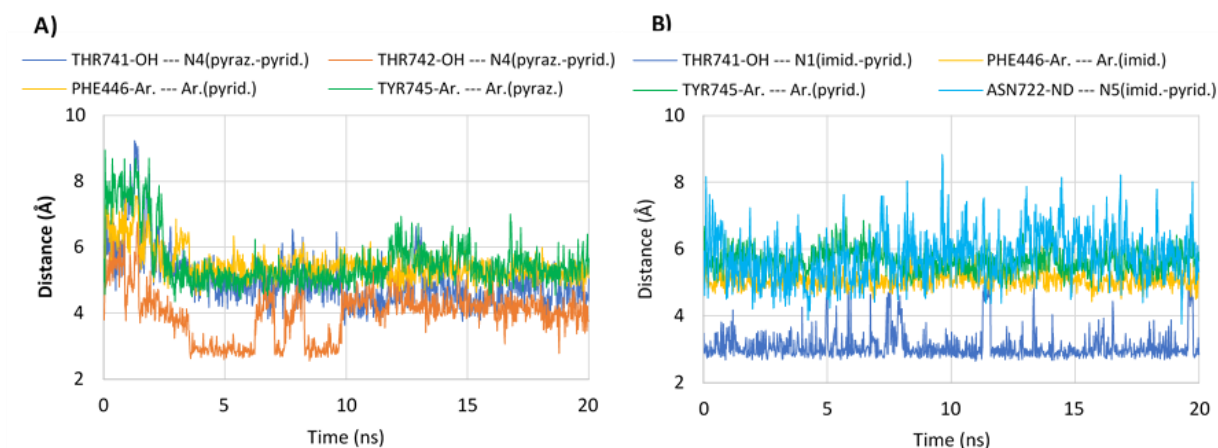

**Figure S5.** Changes in distance between amino acid residues of GluK3-LBD and nitrogen atoms/aromatic rings of the substituent at position 6 of compound **29** (A) and **28** (B), engaged in key interactions, during a 20 ns molecular dynamics simulation. The distances between aromatic fragments were measured between the centroids of the indicated rings.

## NMR Spectra

*N*-(2,3-dioxo-6-(*m*-tolylethynyl)-3,4-dihydroquinoxalin-1(2*H*)-yl)benzamide (**5**)

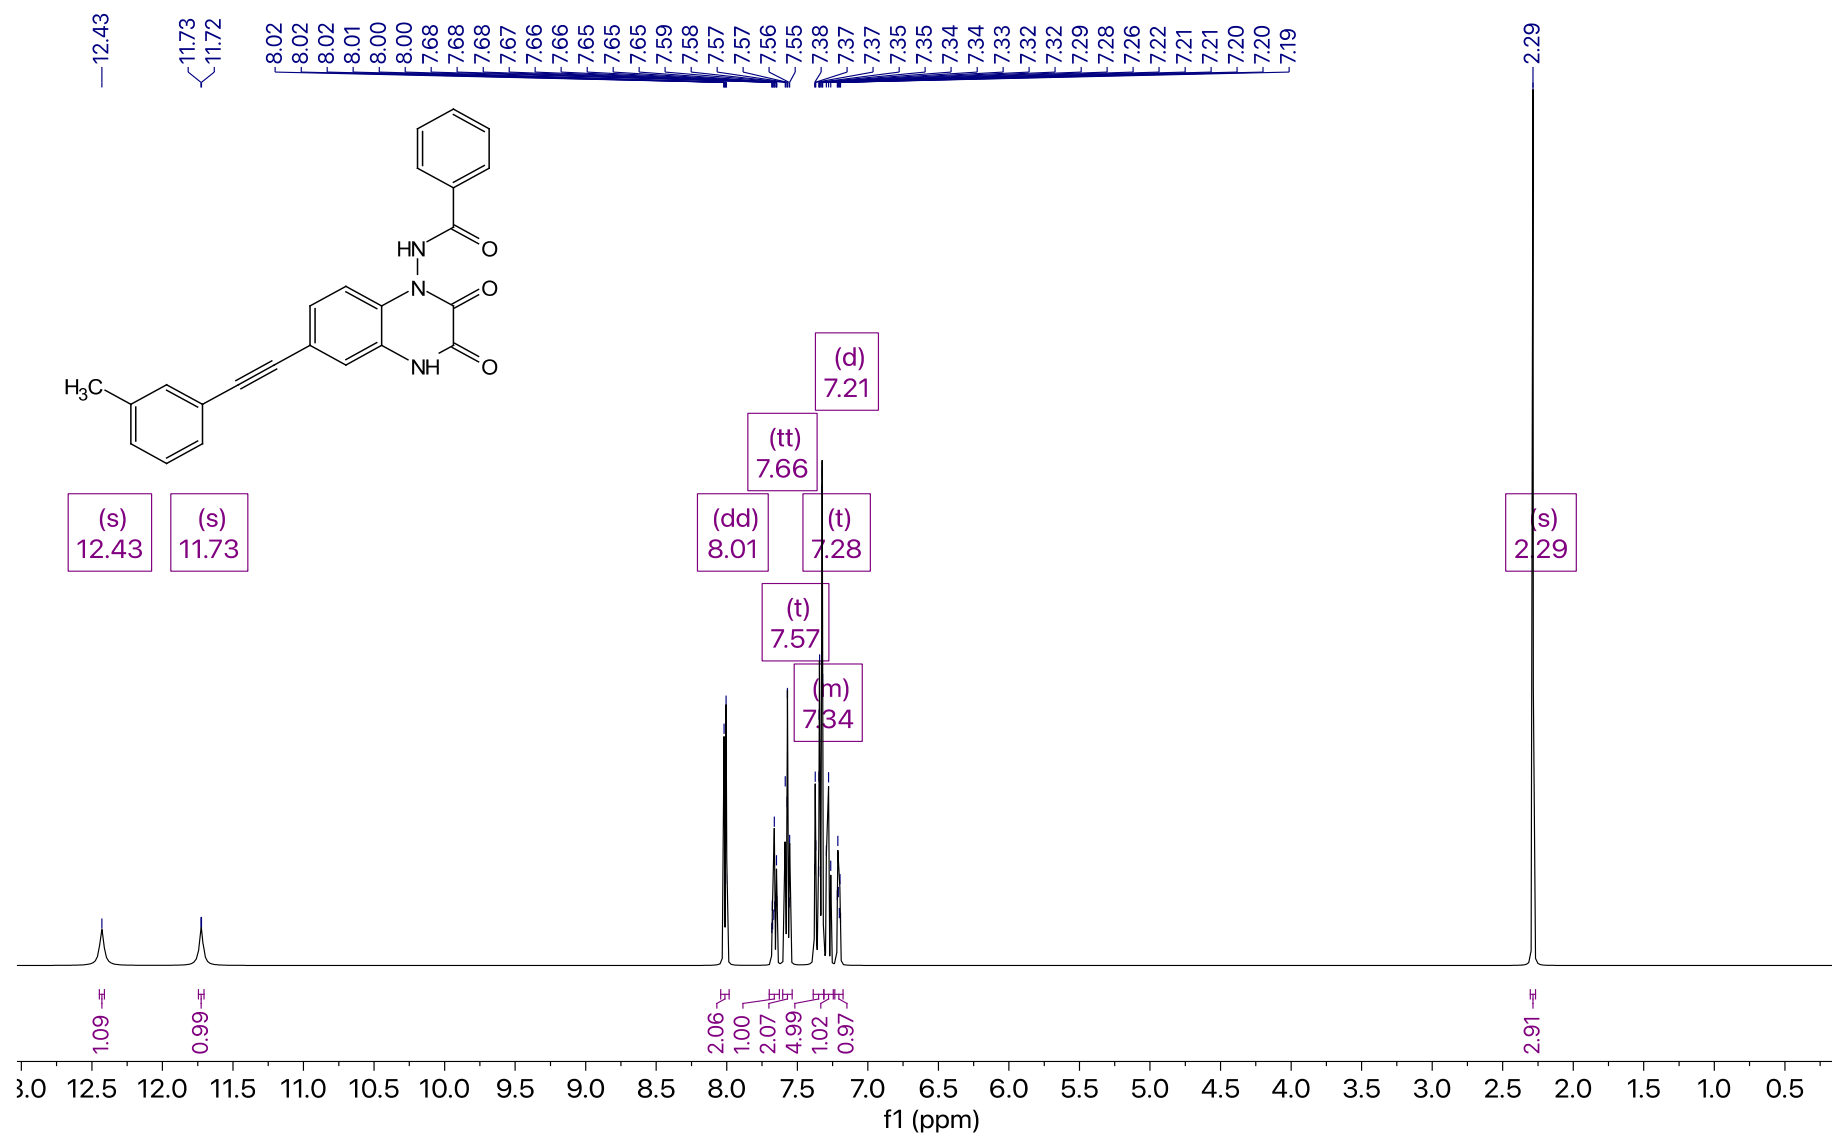

*N*-(2,3-dioxo-6-(*m*-tolylethynyl)-3,4-dihydroquinoxalin-1(2*H*)-yl)benzamide (**5**)

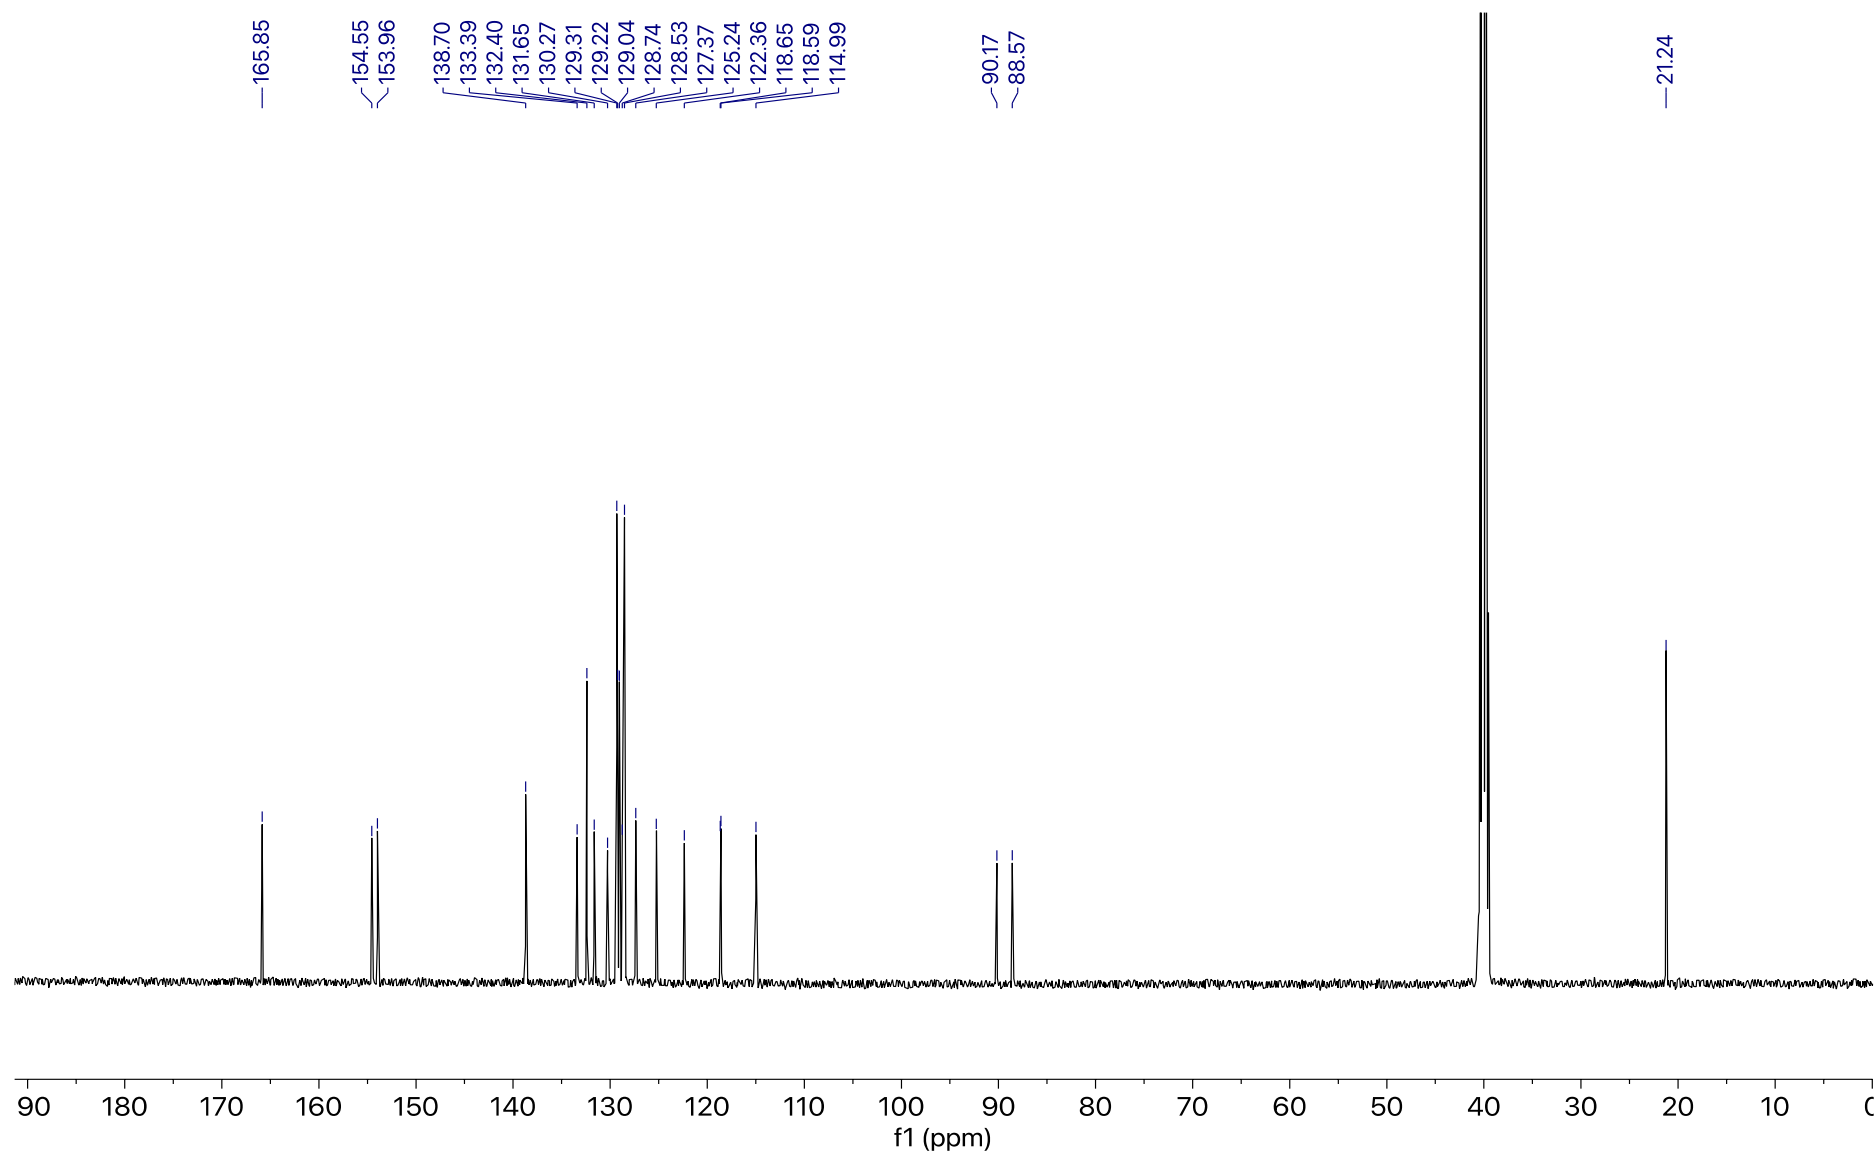

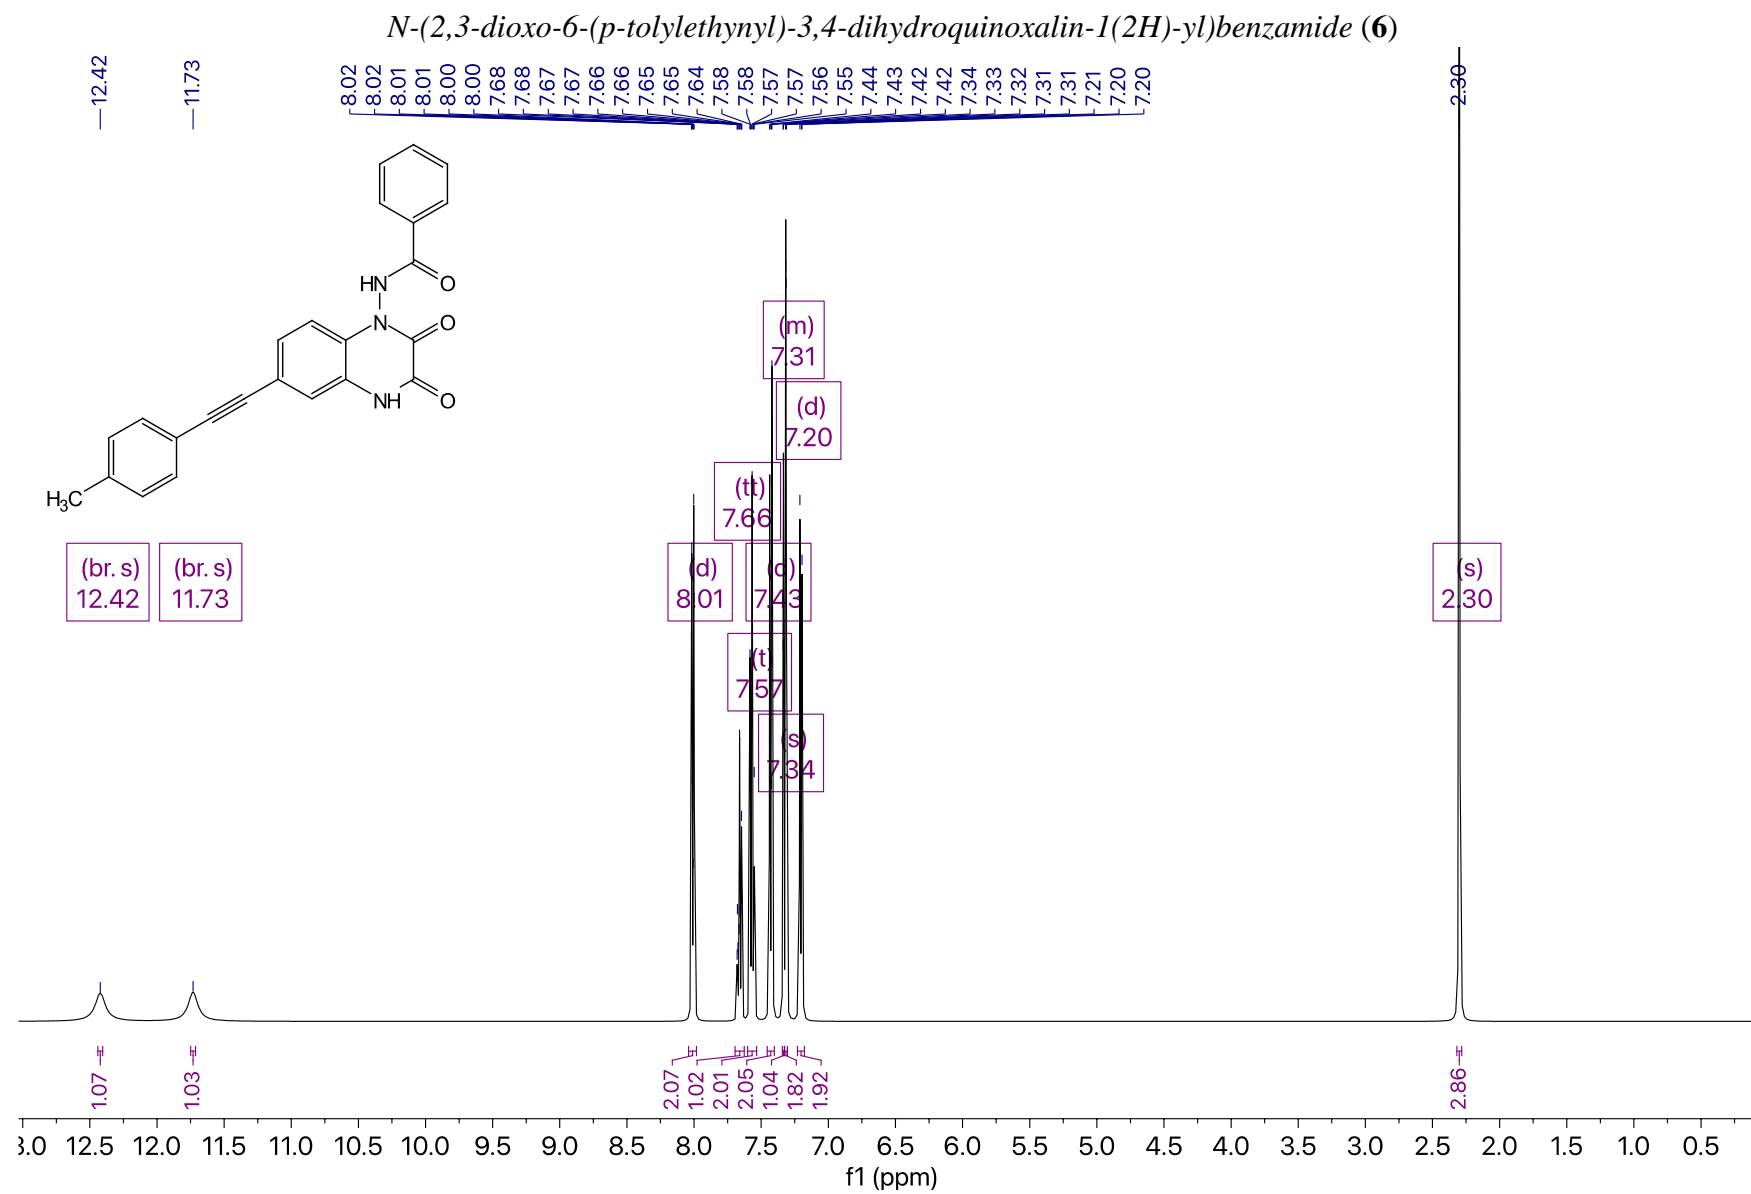



*N*-(2,3-dioxo-6-(*p*-tolylethynyl)-3,4-dihydroquinoxalin-1(2*H*)-yl)benzamide (**6**)

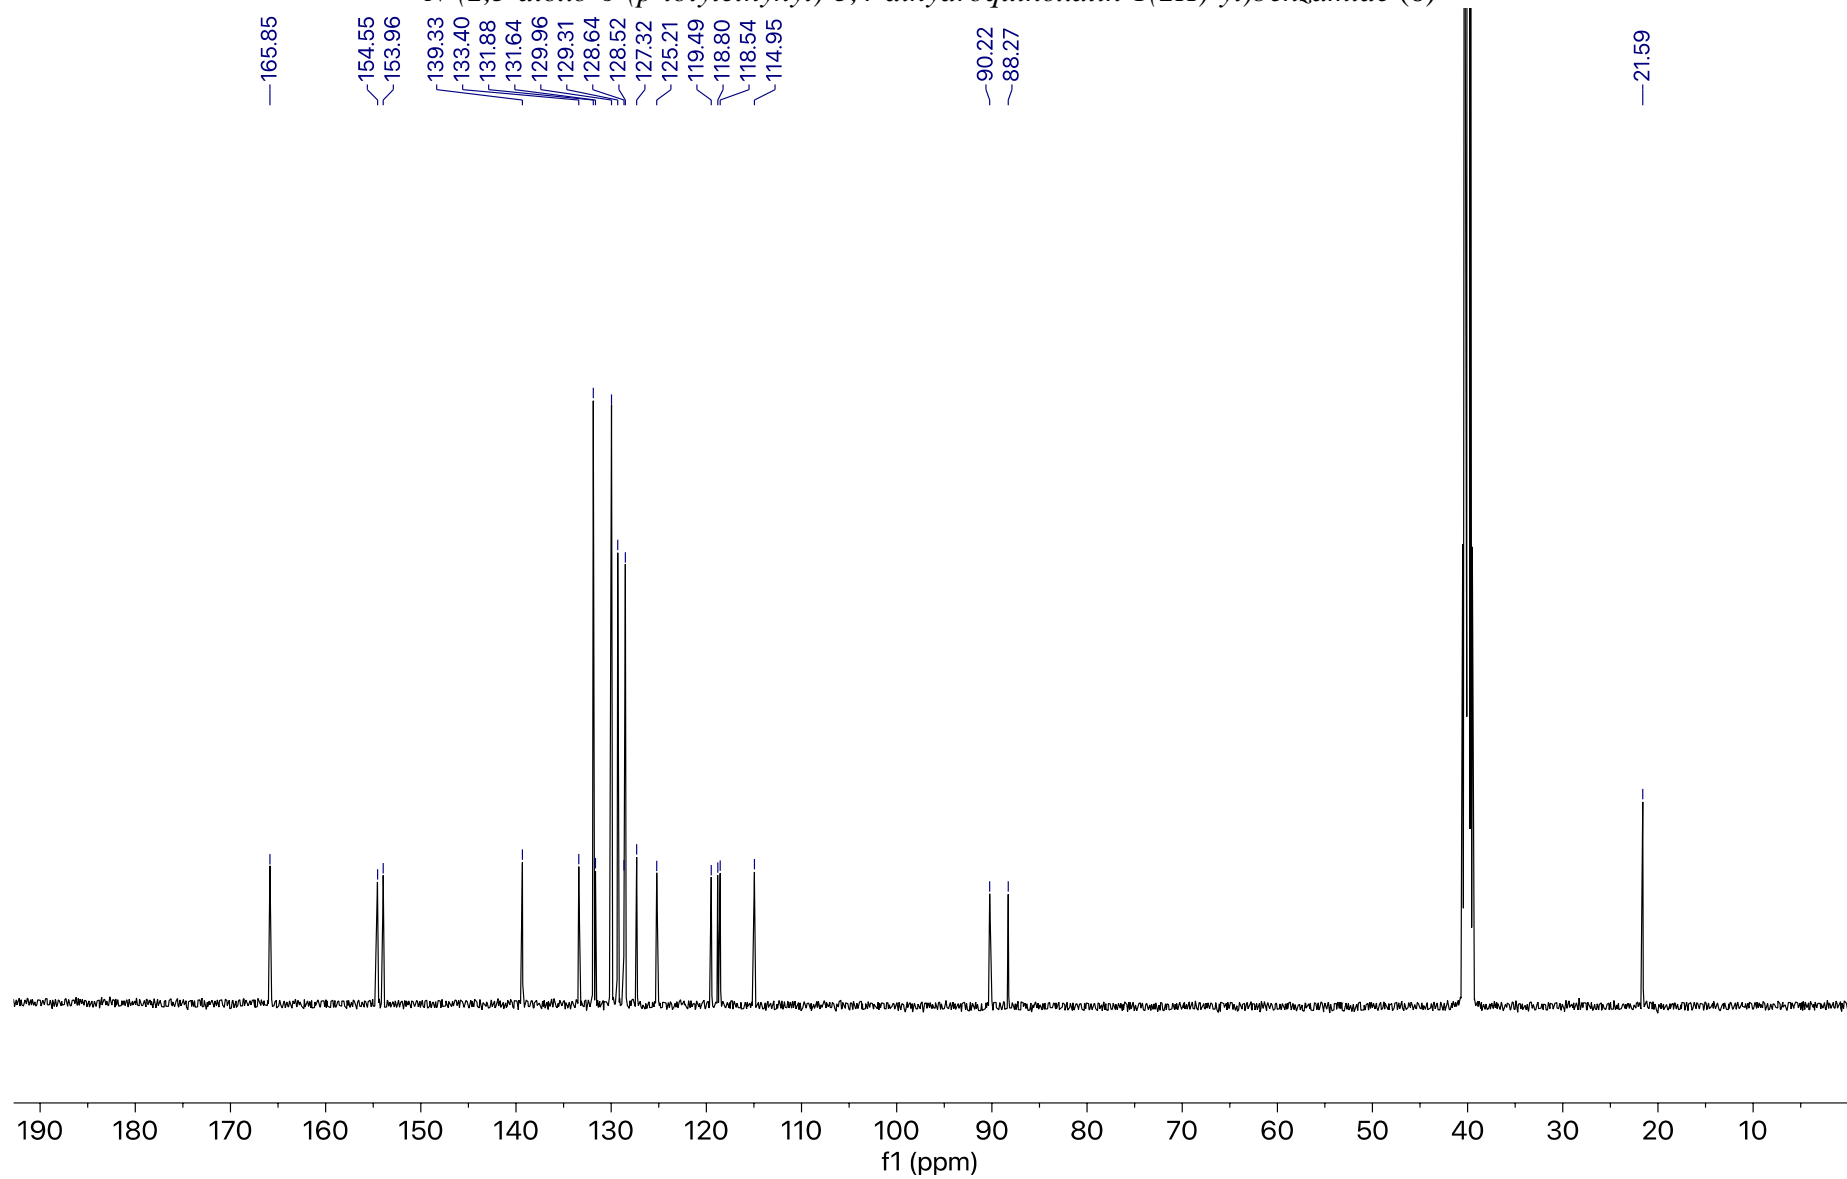

*N*-(6-((4-ethylphenyl)ethynyl)-2,3-dioxo-3,4-dihydroquinoxalin-1(2*H*)-yl)benzamide (**7**)

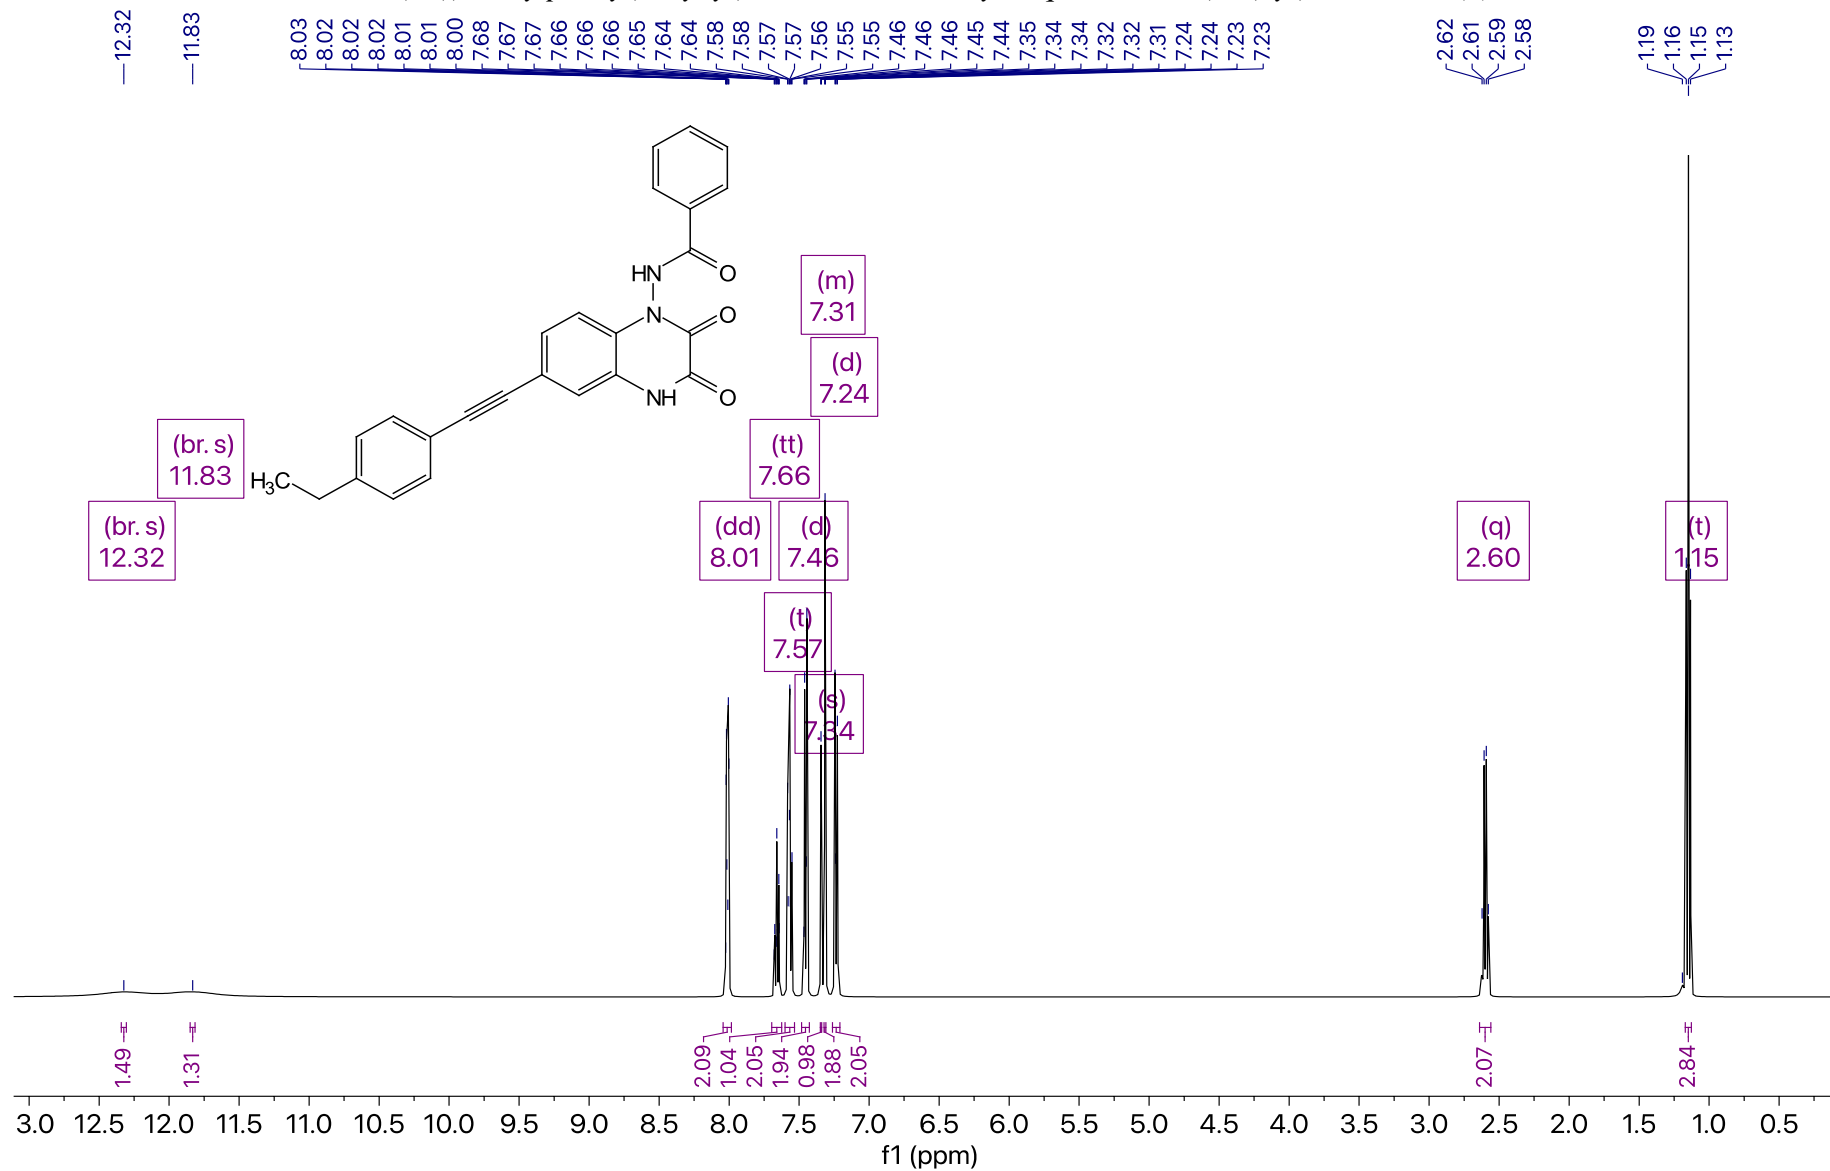

*N*-(6-((4-ethylphenyl)ethynyl)-2,3-dioxo-3,4-dihydroquinoxalin-1(2*H*)-yl)benzamide (**7**)

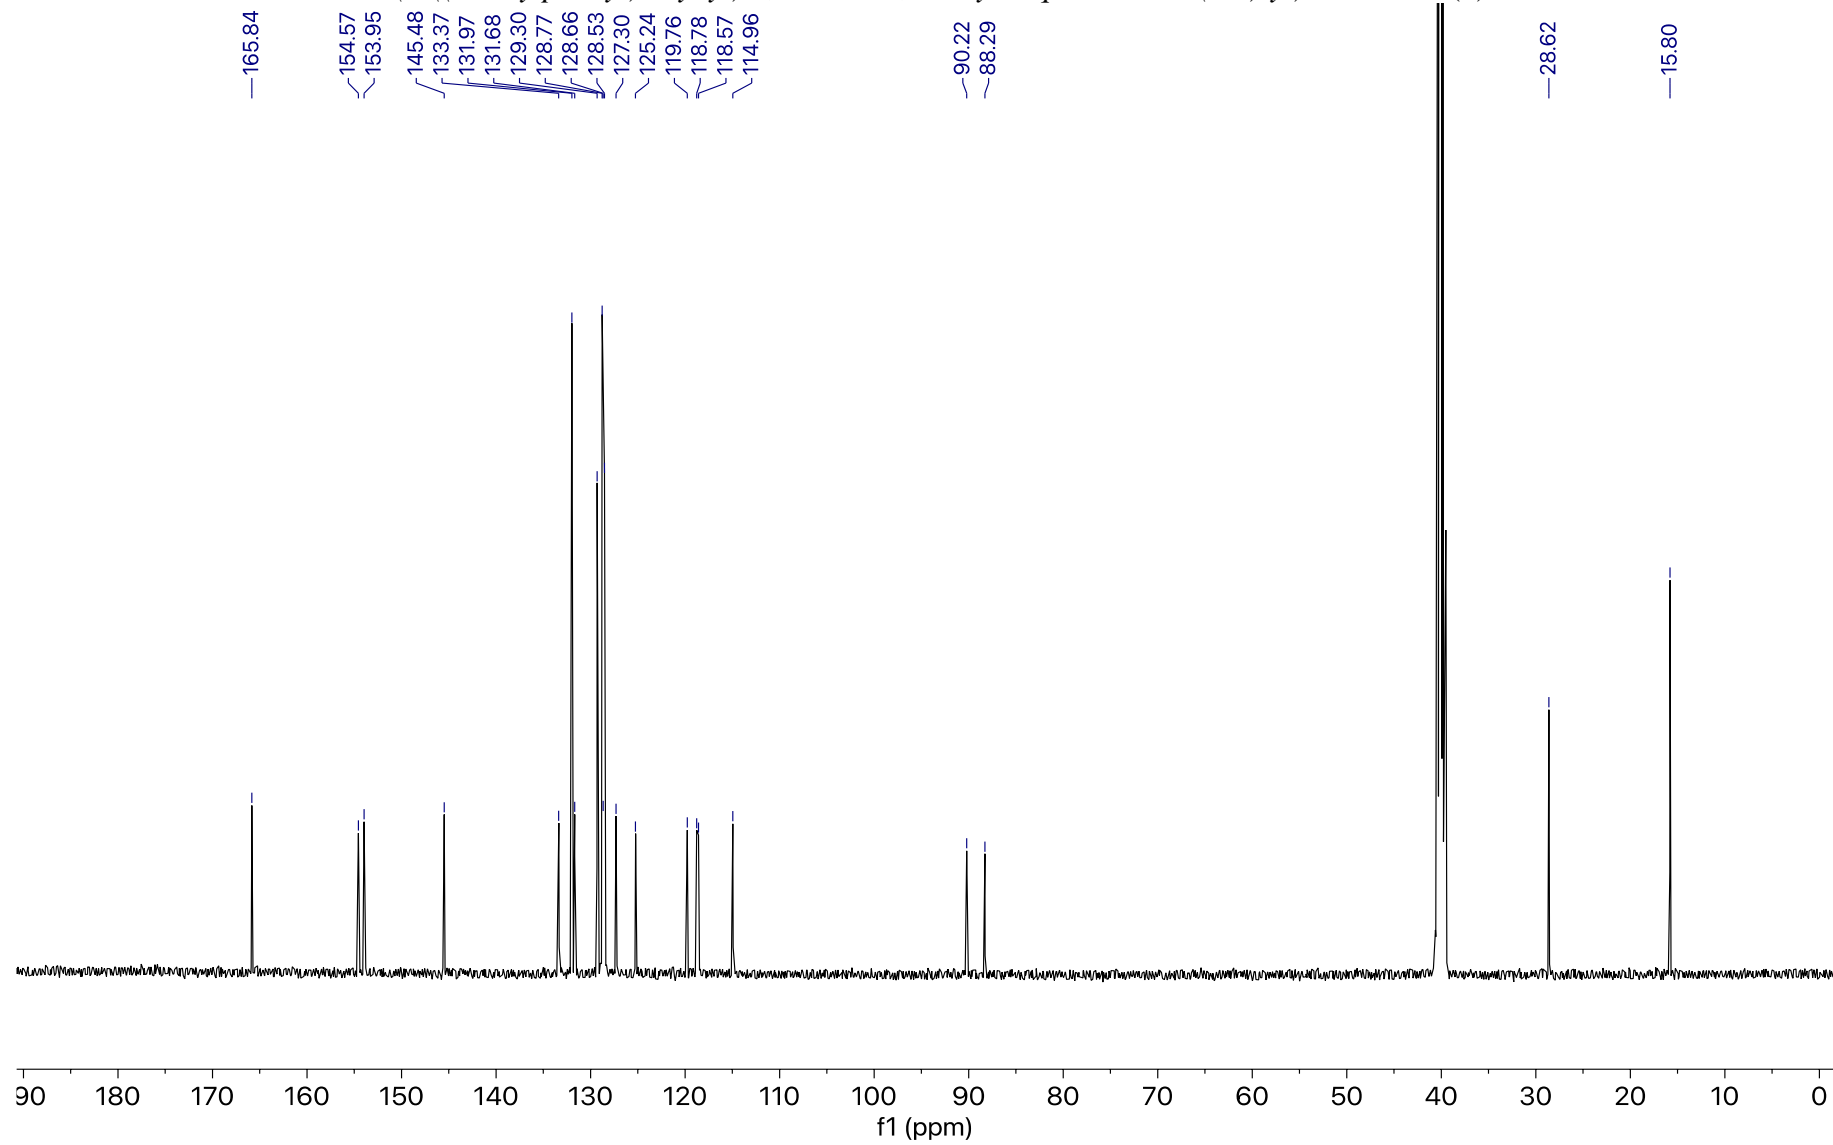

*N*-(2,3-dioxo-6-((4-propylphenyl)ethynyl)-3,4-dihydroquinoxalin-1(2*H*)-yl)benzamide (**8**)

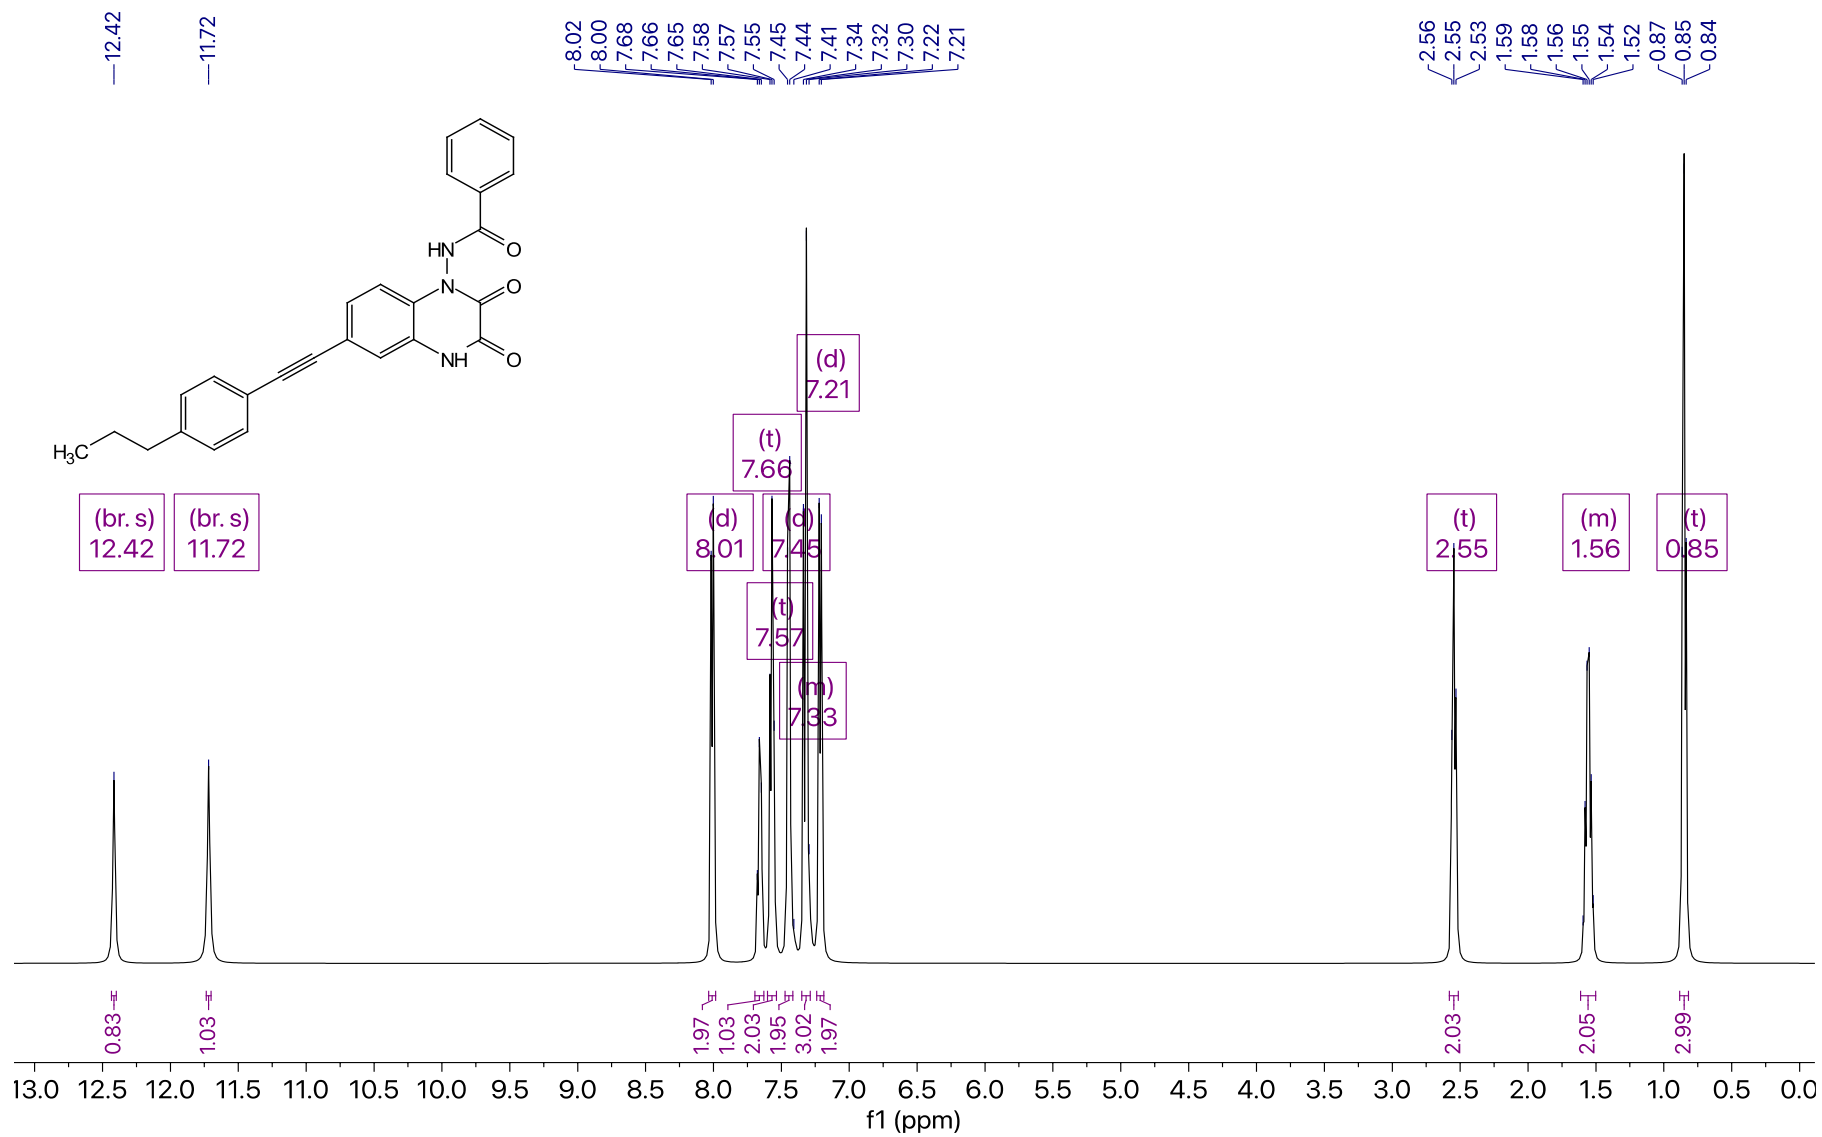

*N*-(2,3-dioxo-6-((4-propylphenyl)ethynyl)-3,4-dihydroquinoxalin-1(2*H*)-yl)benzamide (**8**)

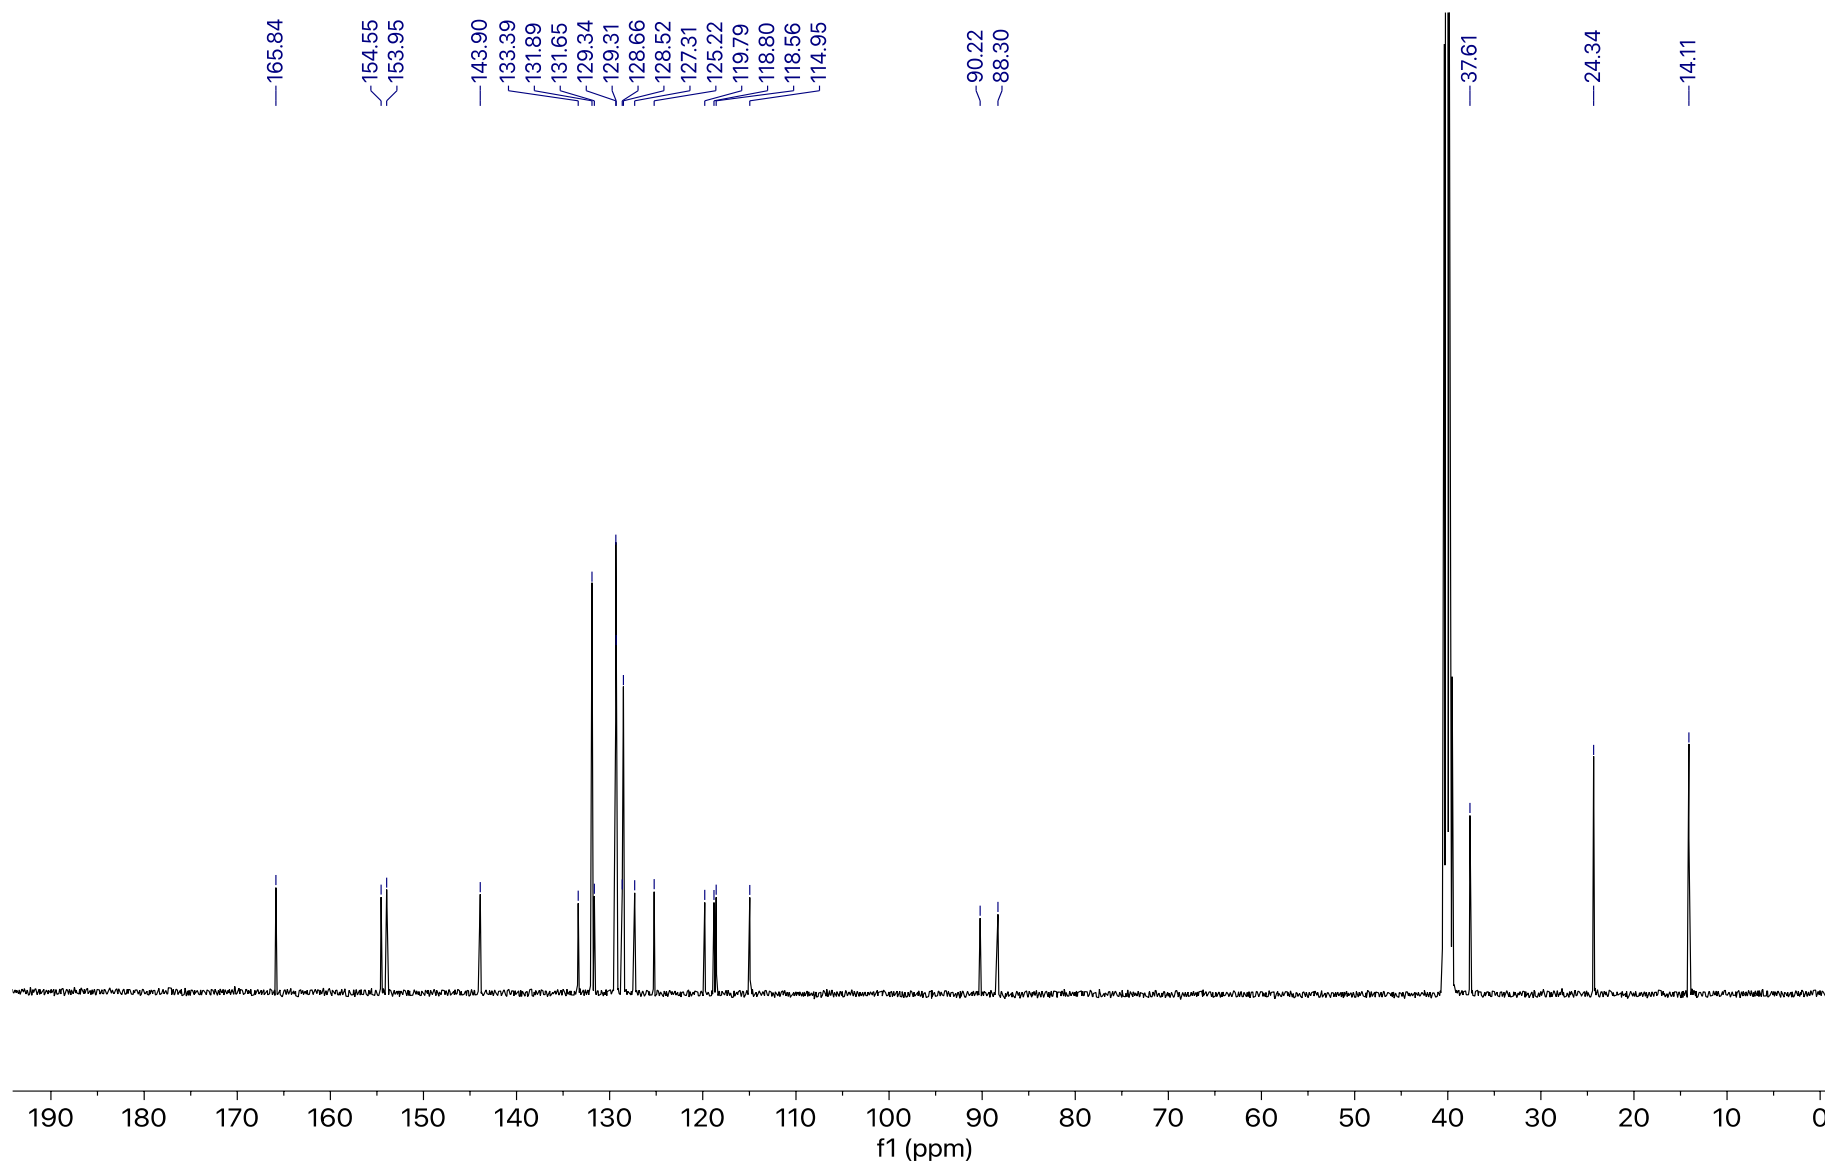

*N*-(6-((4-isopropylphenyl)ethynyl)-2,3-dioxo-3,4-dihydroquinoxalin-1(2*H*)-yl)benzamide (**9**)

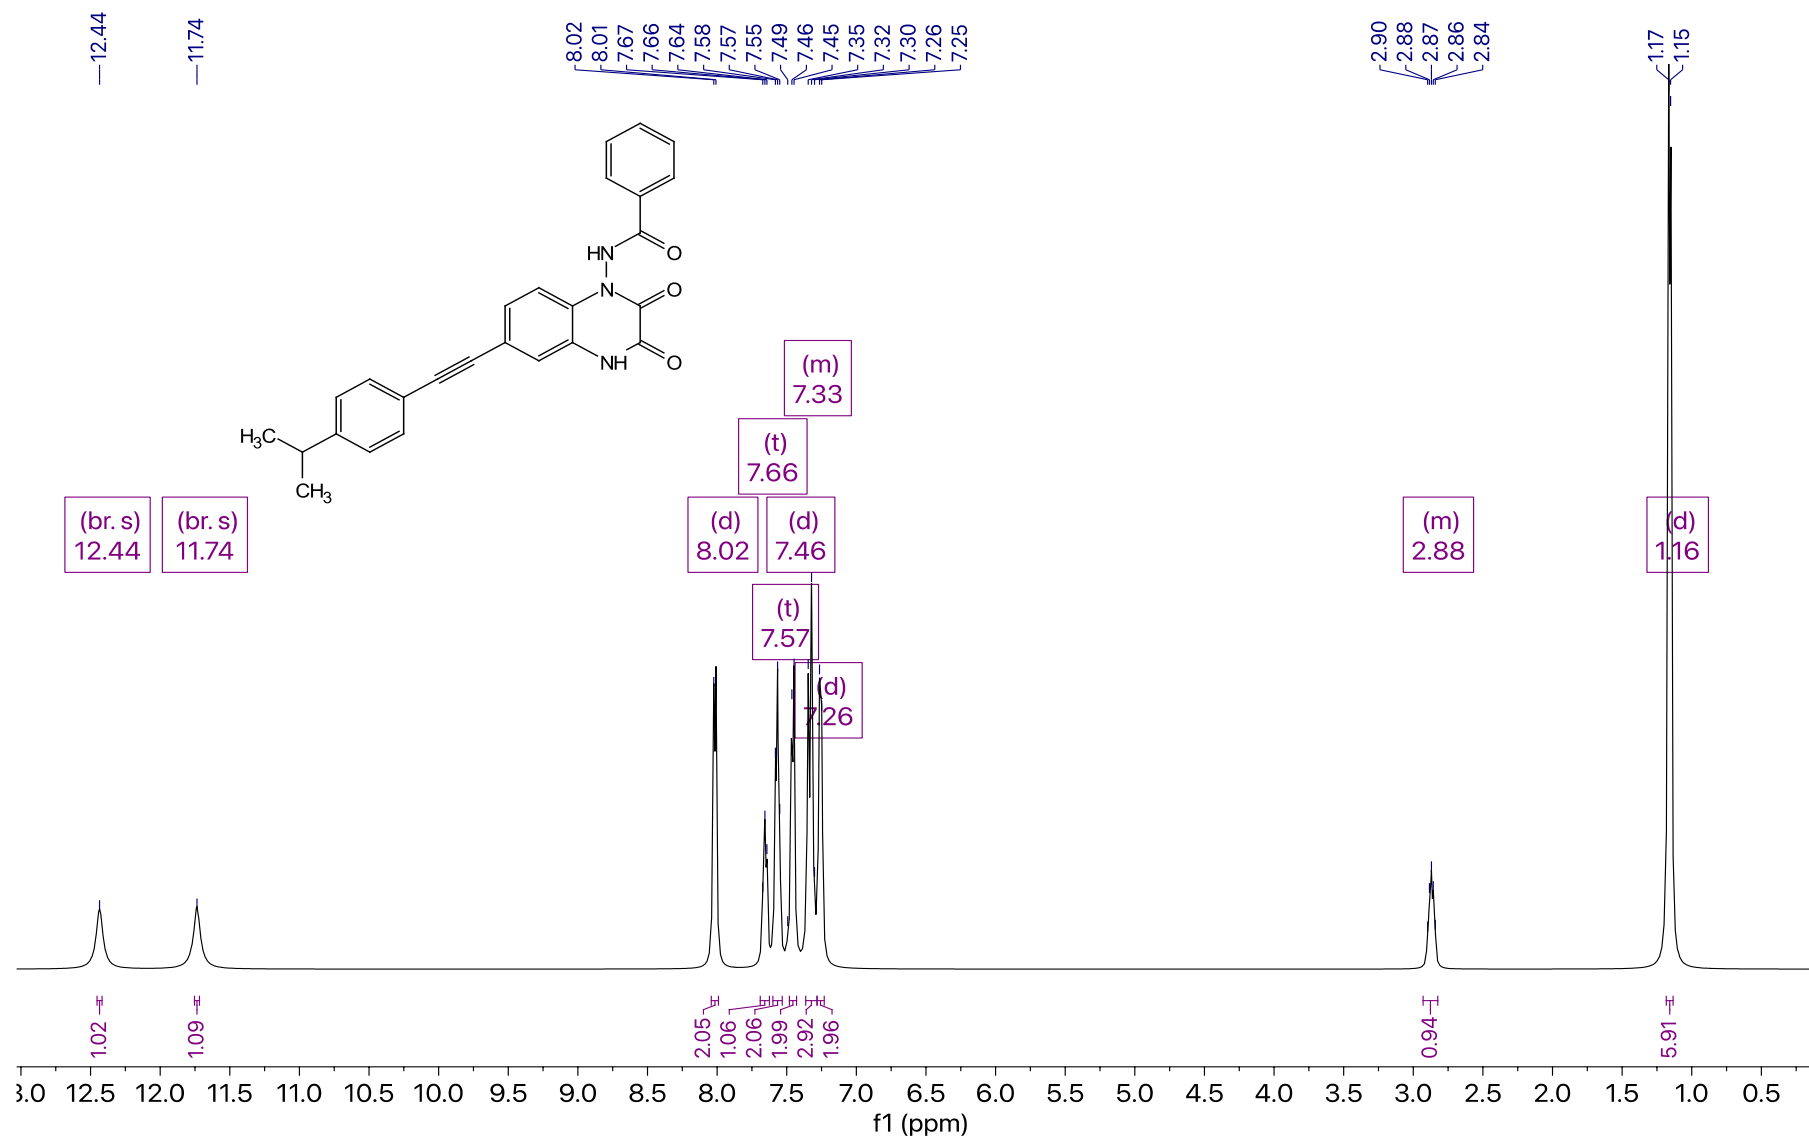

*N*-(6-((4-isopropylphenyl)ethynyl)-2,3-dioxo-3,4-dihydroquinoxalin-1(2*H*)-yl)benzamide (**9**)

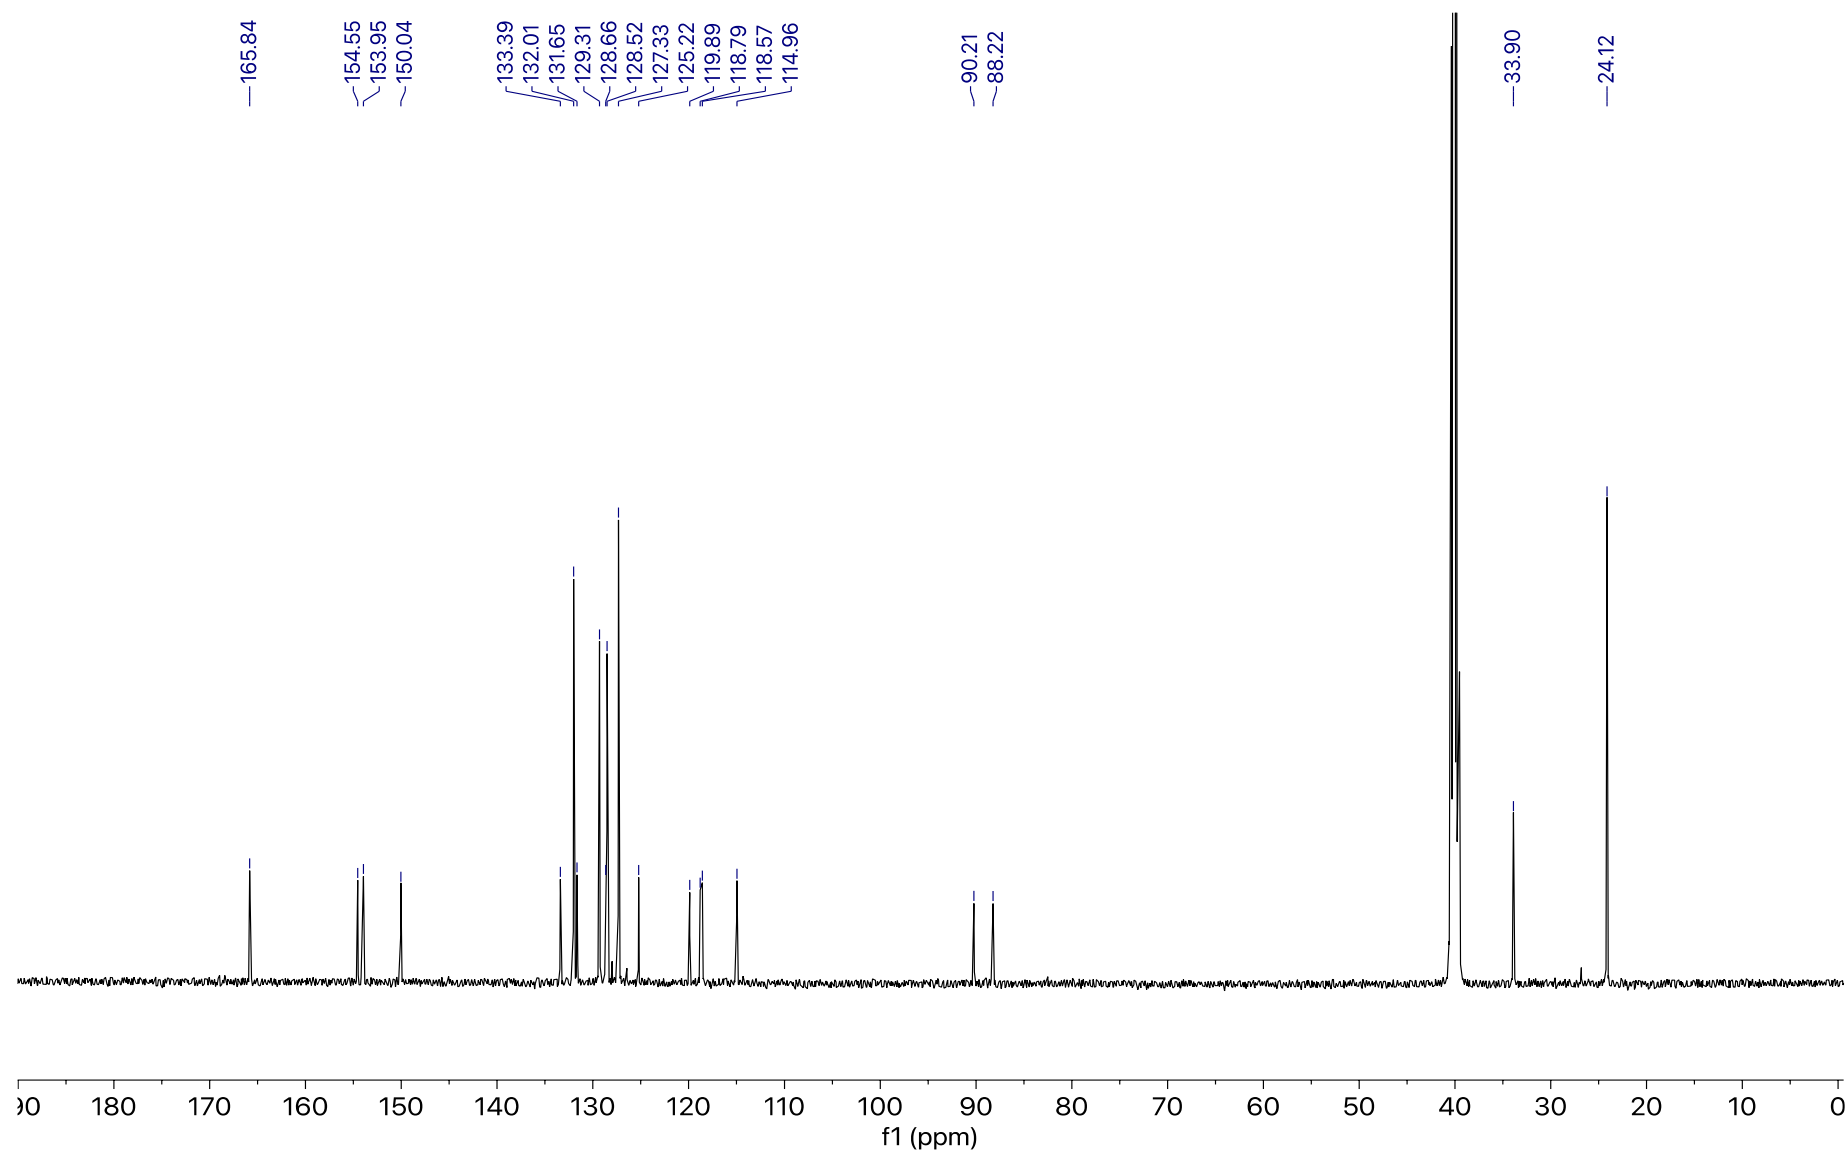

*N*-(6-((4-chlorophenyl)ethynyl)-2,3-dioxo-3,4-dihydroquinoxalin-1(2*H*)-yl)benzamide (**10**)

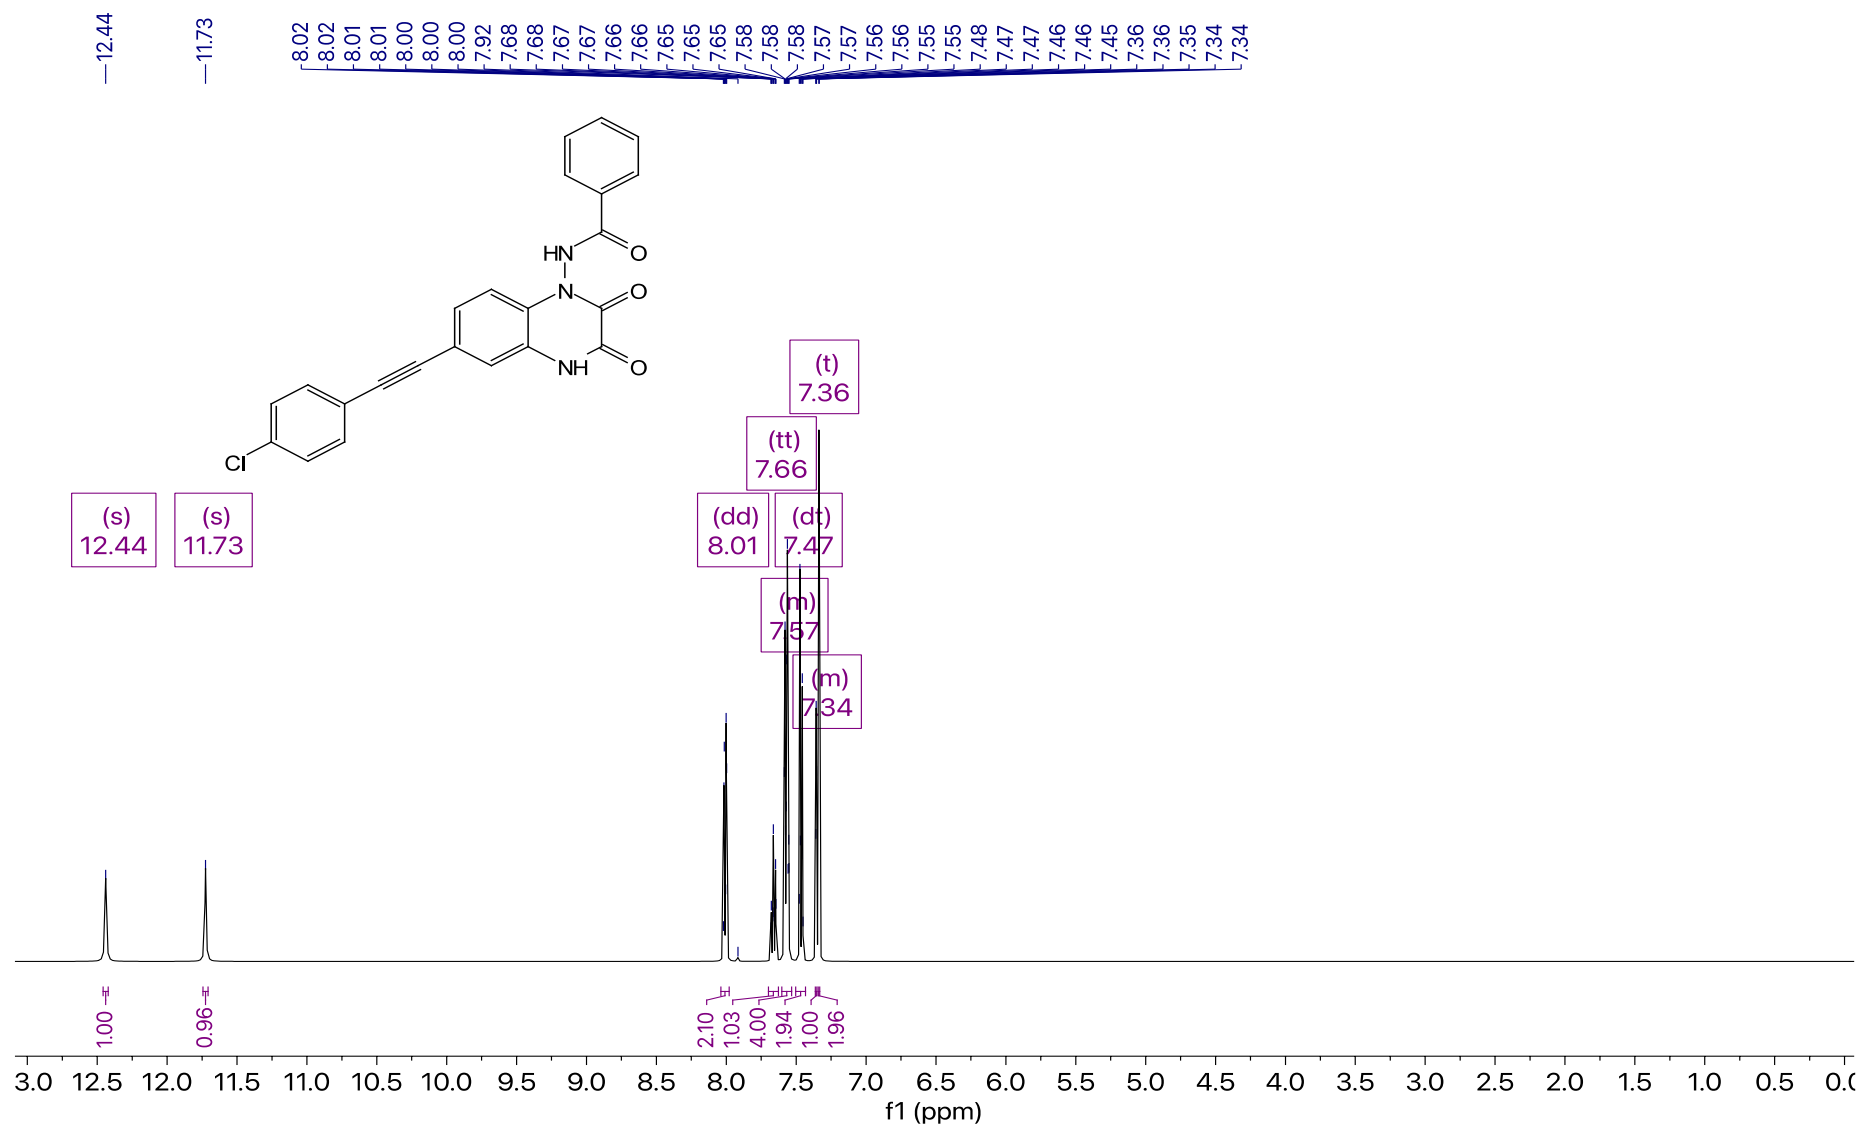



*N*-(6-((4-chlorophenyl)ethynyl)-2,3-dioxo-3,4-dihydroquinoxalin-1(2*H*)-yl)benzamide (**10**)

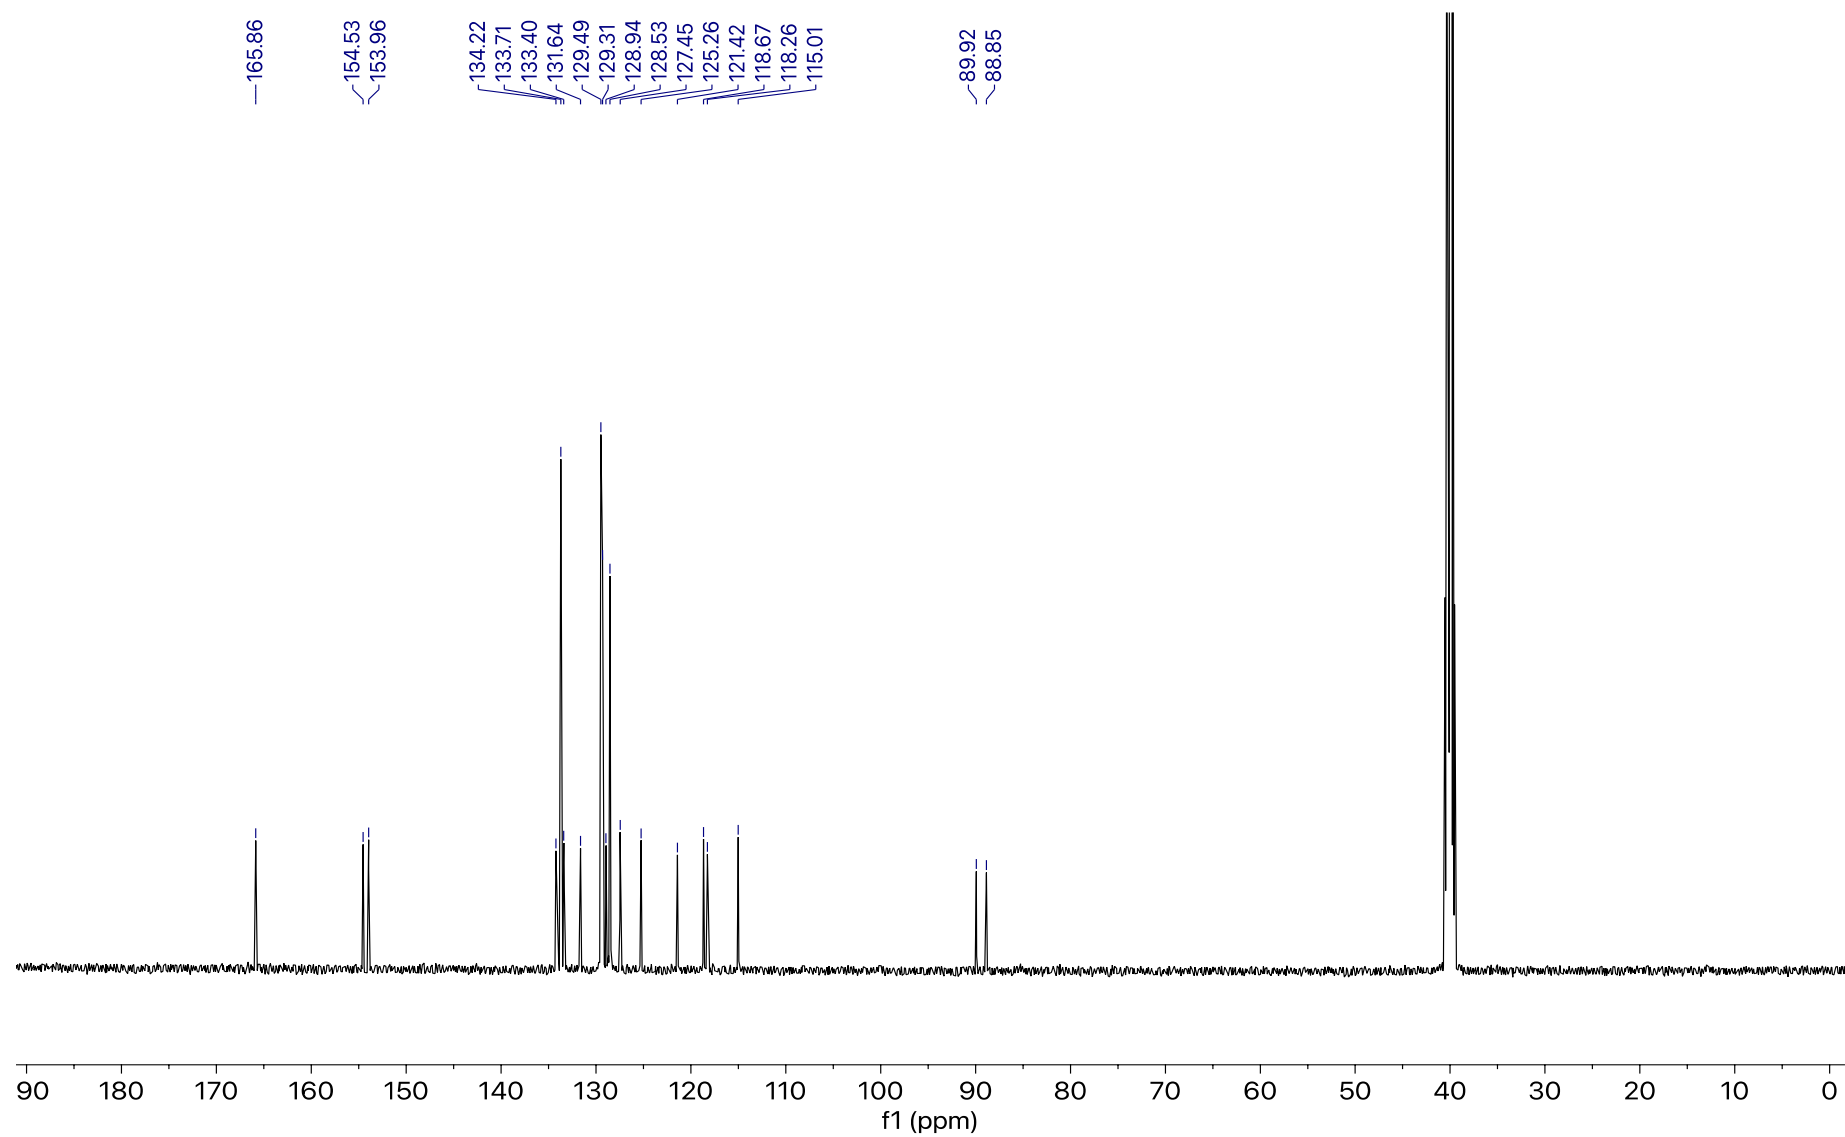

*N*-(2,3-dioxo-6-((4-(trifluoromethyl)phenyl)ethynyl)-3,4-dihydroquinoxalin-1(2*H*)-yl)benzamide (**11**)

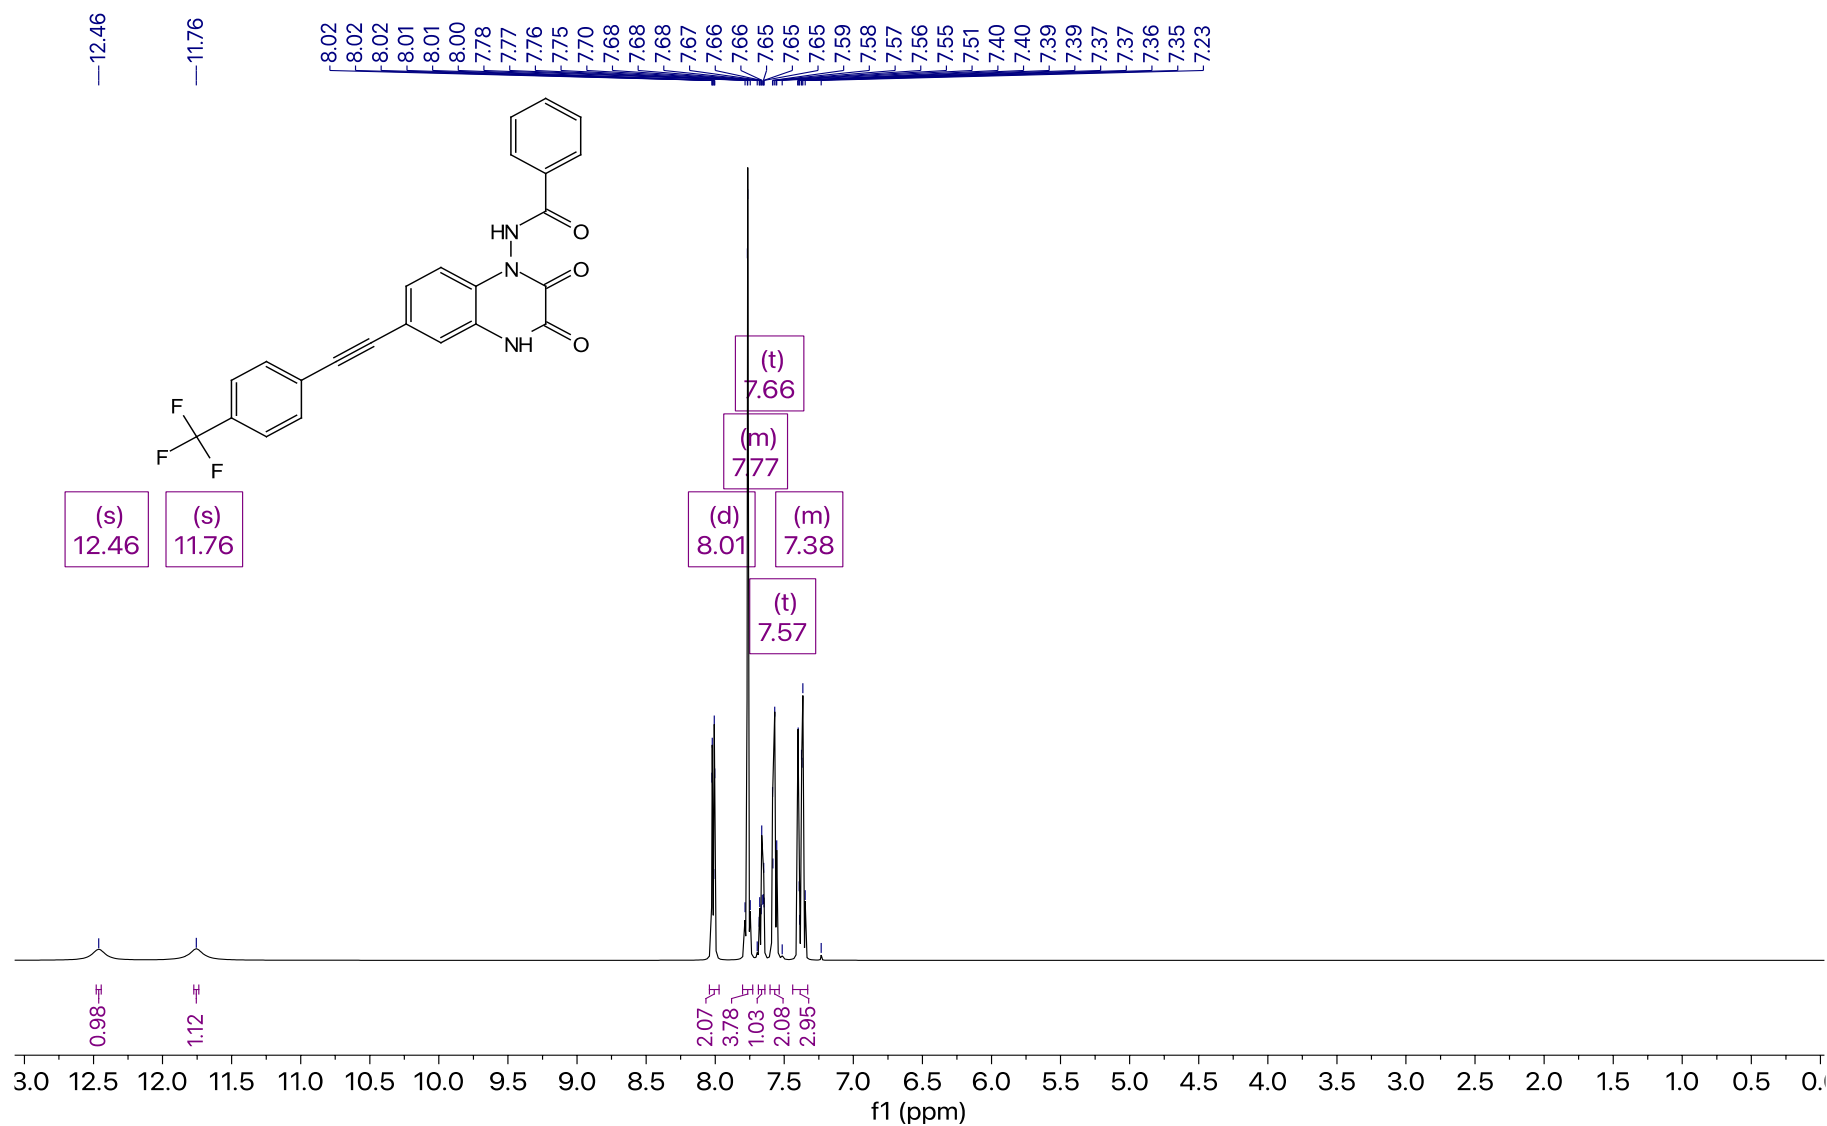

*N*-(2,3-dioxo-6-((4-(trifluoromethyl)phenyl)ethynyl)-3,4-dihydroquinoxalin-1(2*H*)-yl)benzamide (**11**)

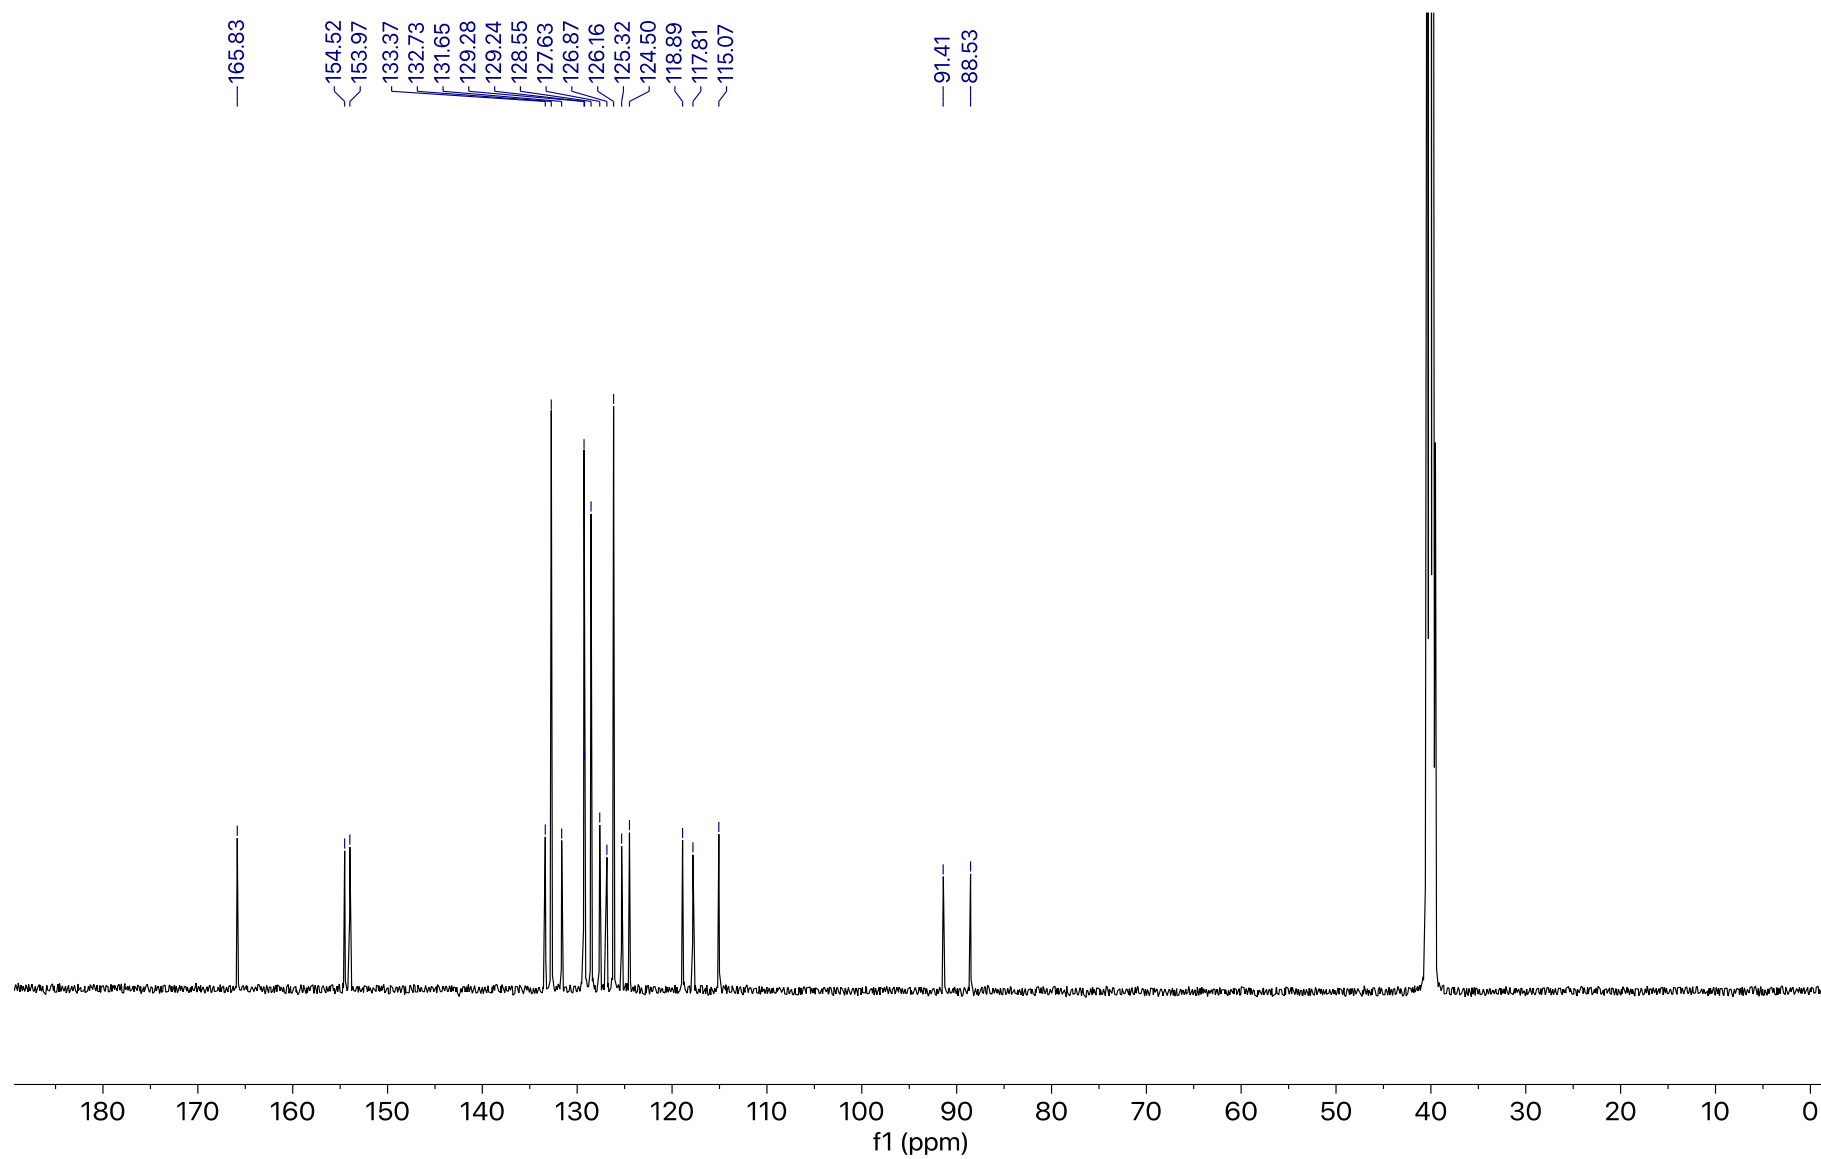

*N*-(6-((4-methoxyphenyl)ethynyl)-2,3-dioxo-3,4-dihydroquinoxalin-1(2*H*)-yl)benzamide (**12**)

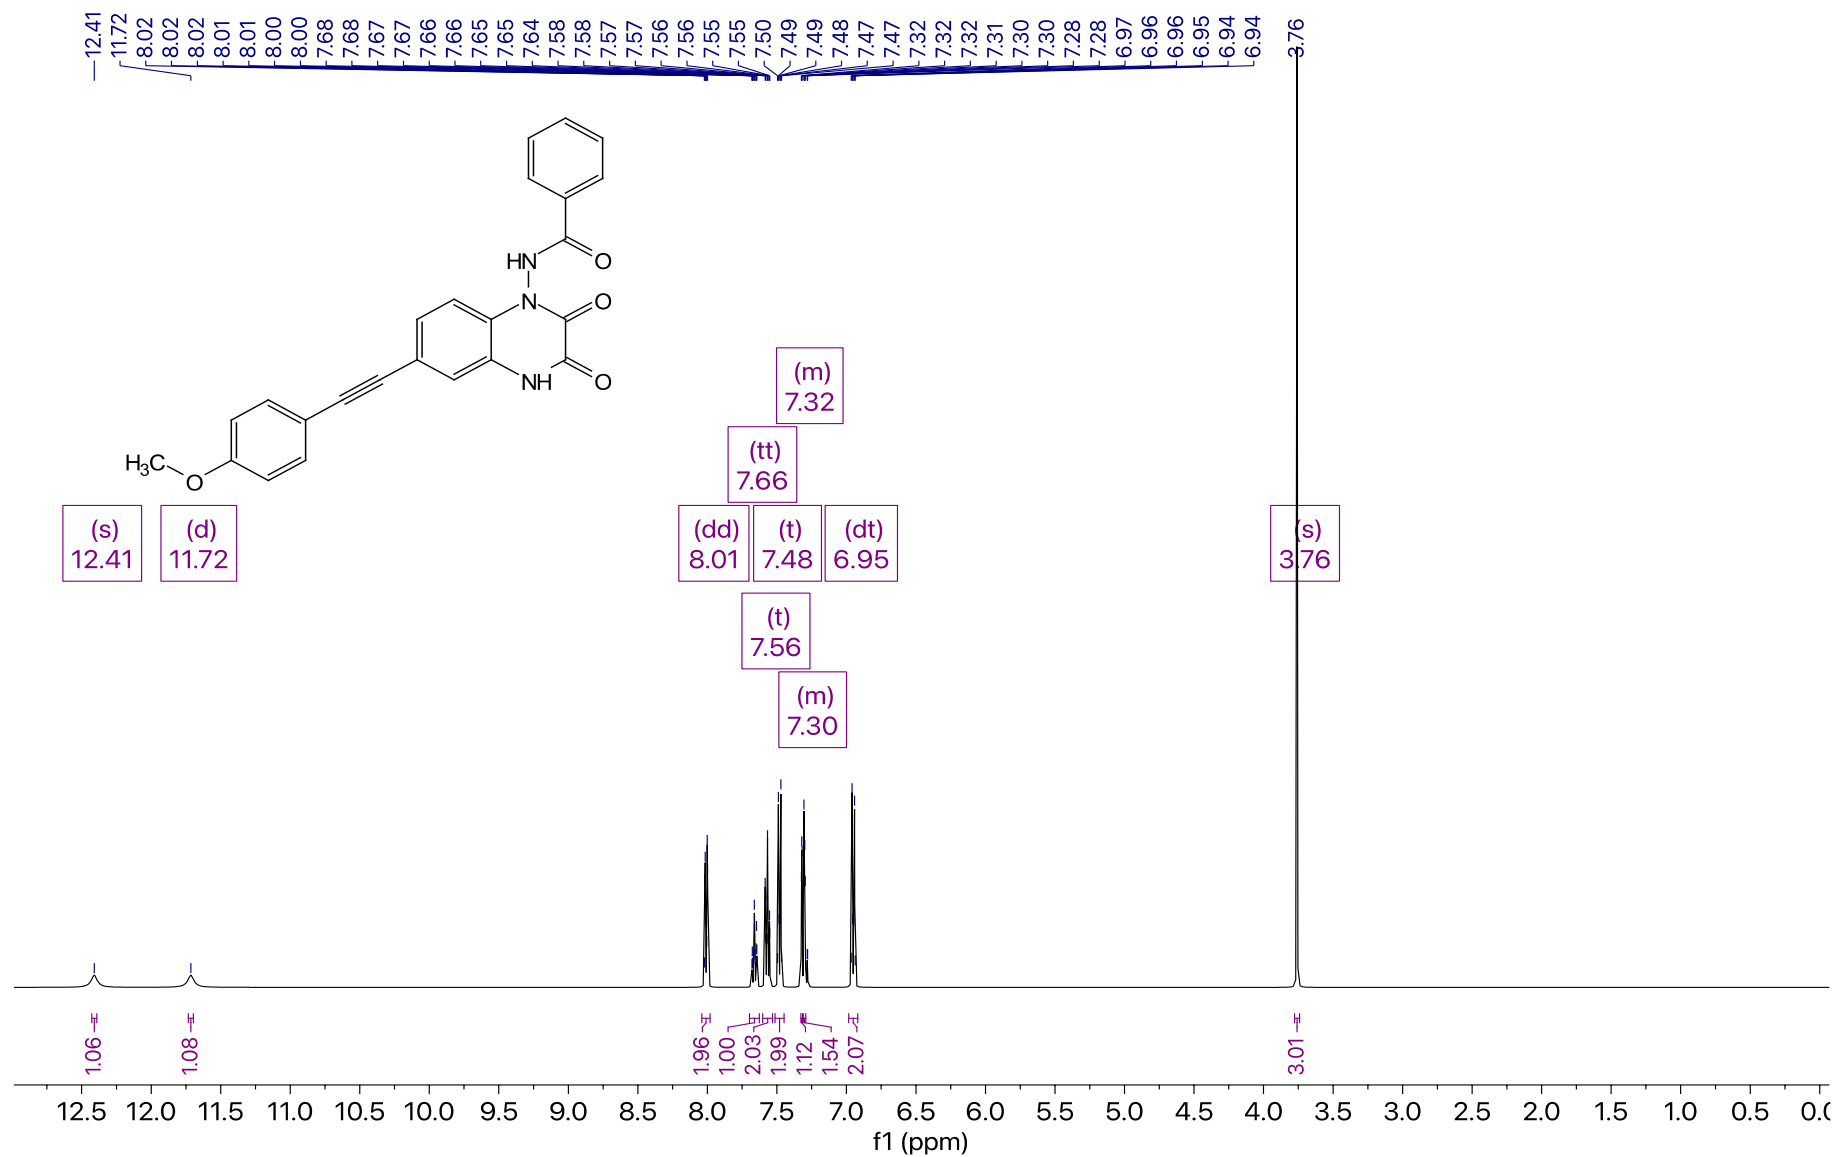

*N*-(6-((4-methoxyphenyl)ethynyl)-2,3-dioxo-3,4-dihydroquinoxalin-1(2*H*)-yl)benzamide (**12**)

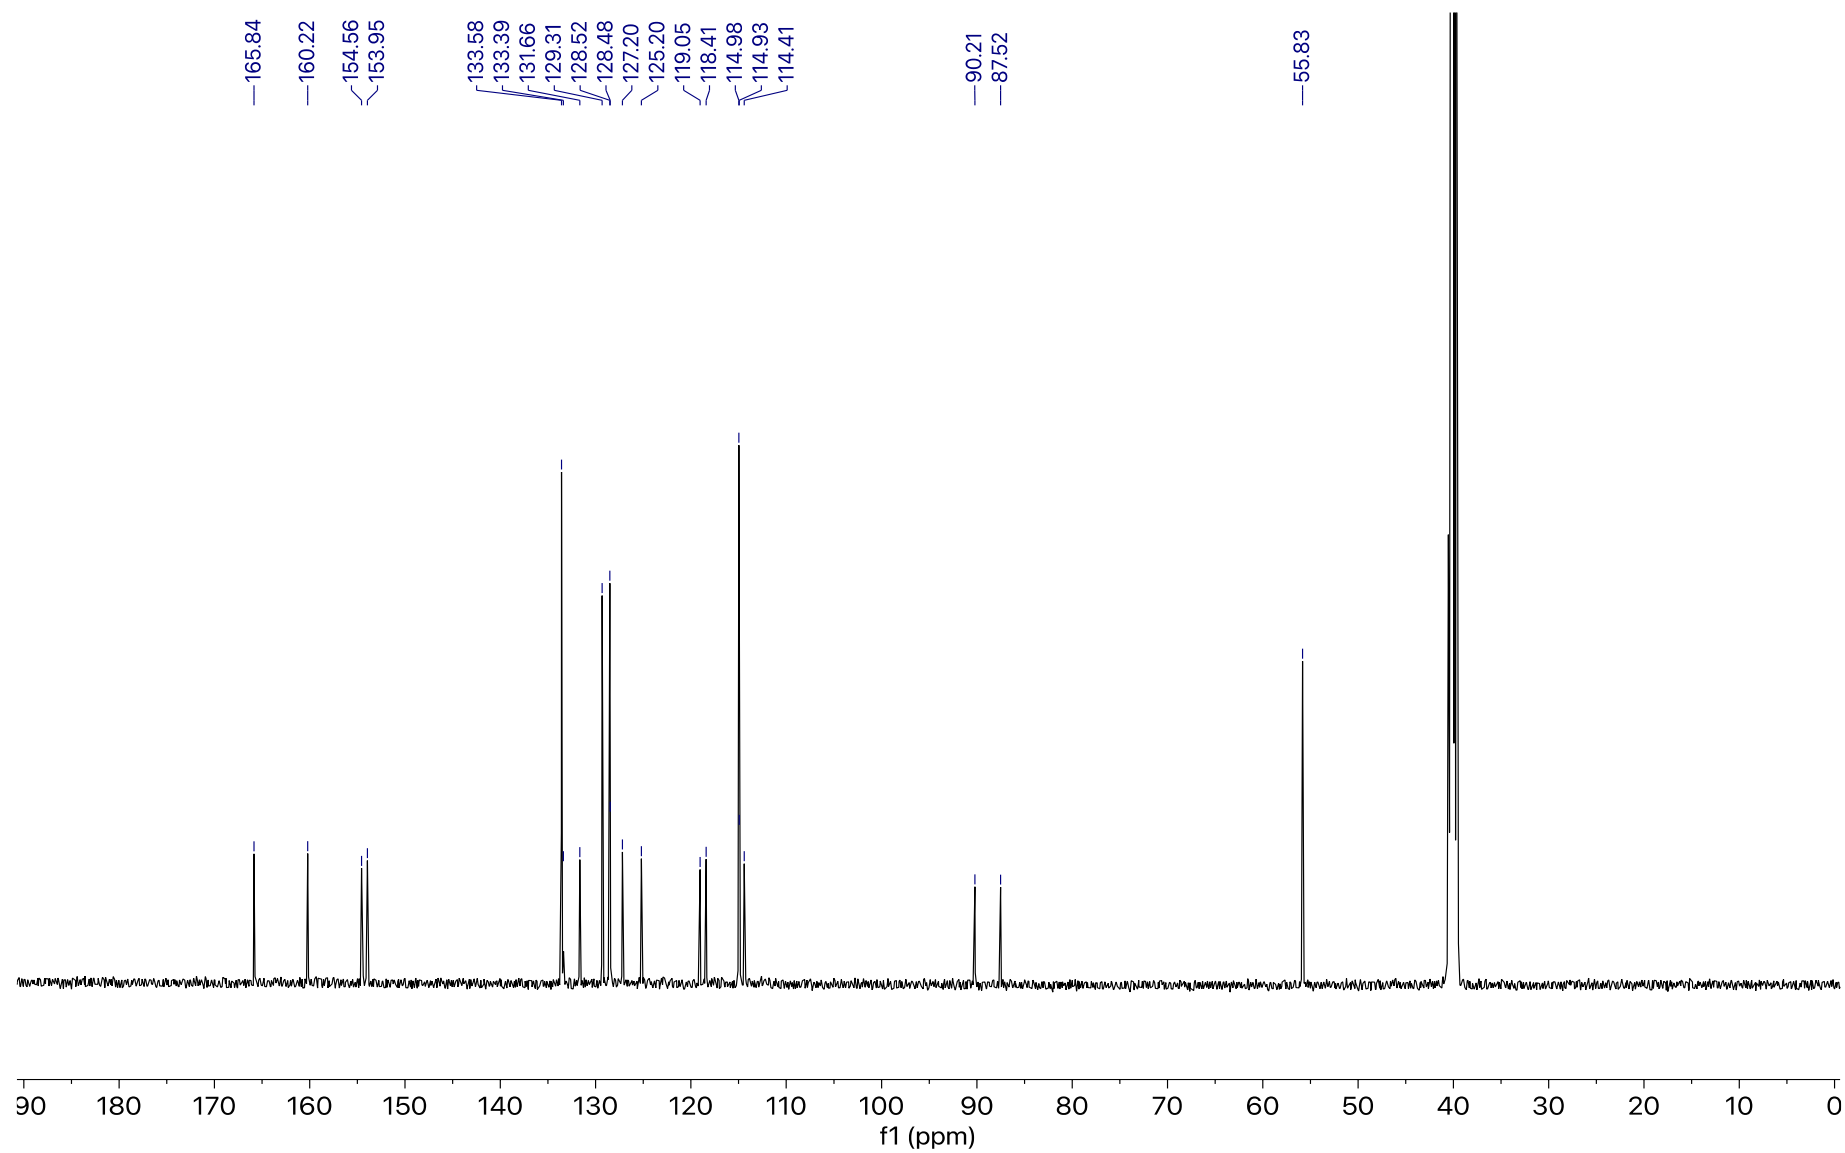

*N*-(2,3-dioxo-6-((4-phenoxyphenyl)ethynyl)-3,4-dihydroquinoxalin-1(2*H*)-yl)benzamide (**13**)

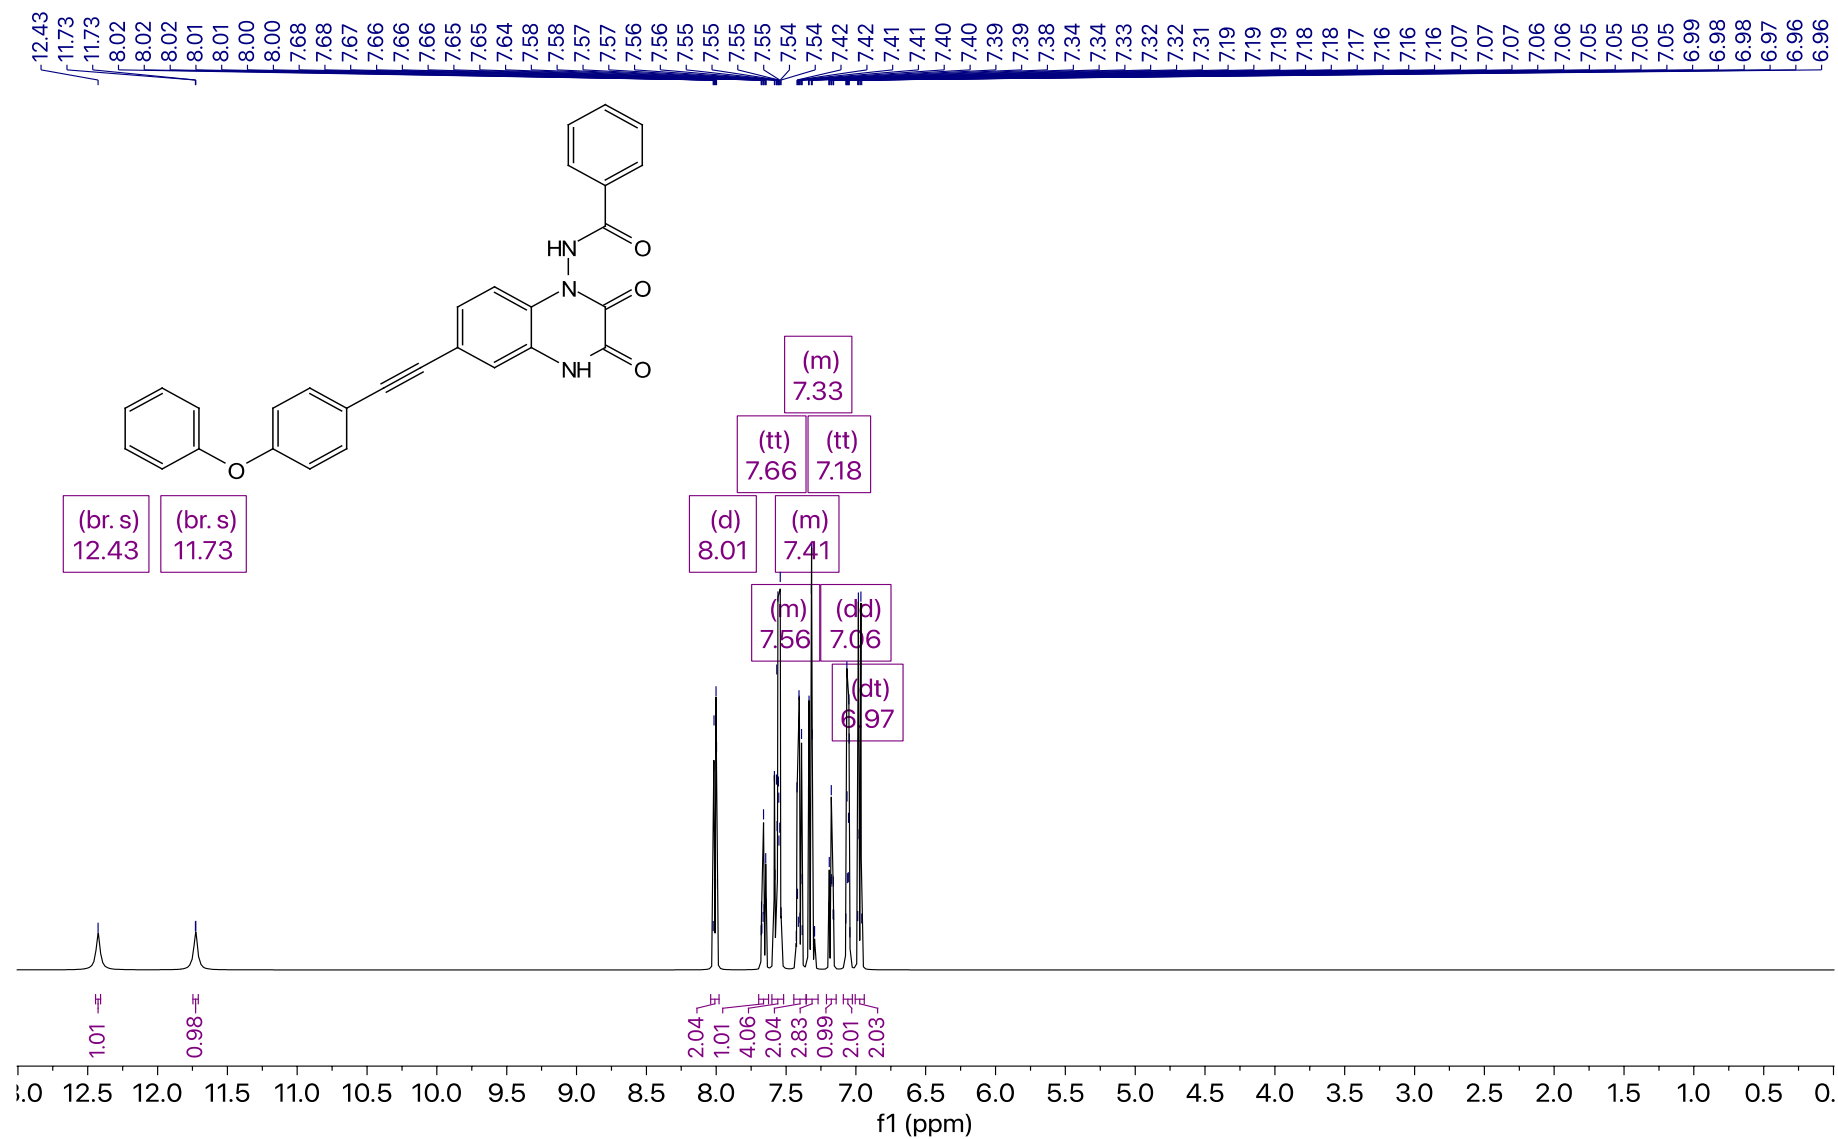

*N*-(2,3-dioxo-6-((4-phenoxyphenyl)ethynyl)-3,4-dihydroquinoxalin-1(2*H*)-yl)benzamide (**13**)

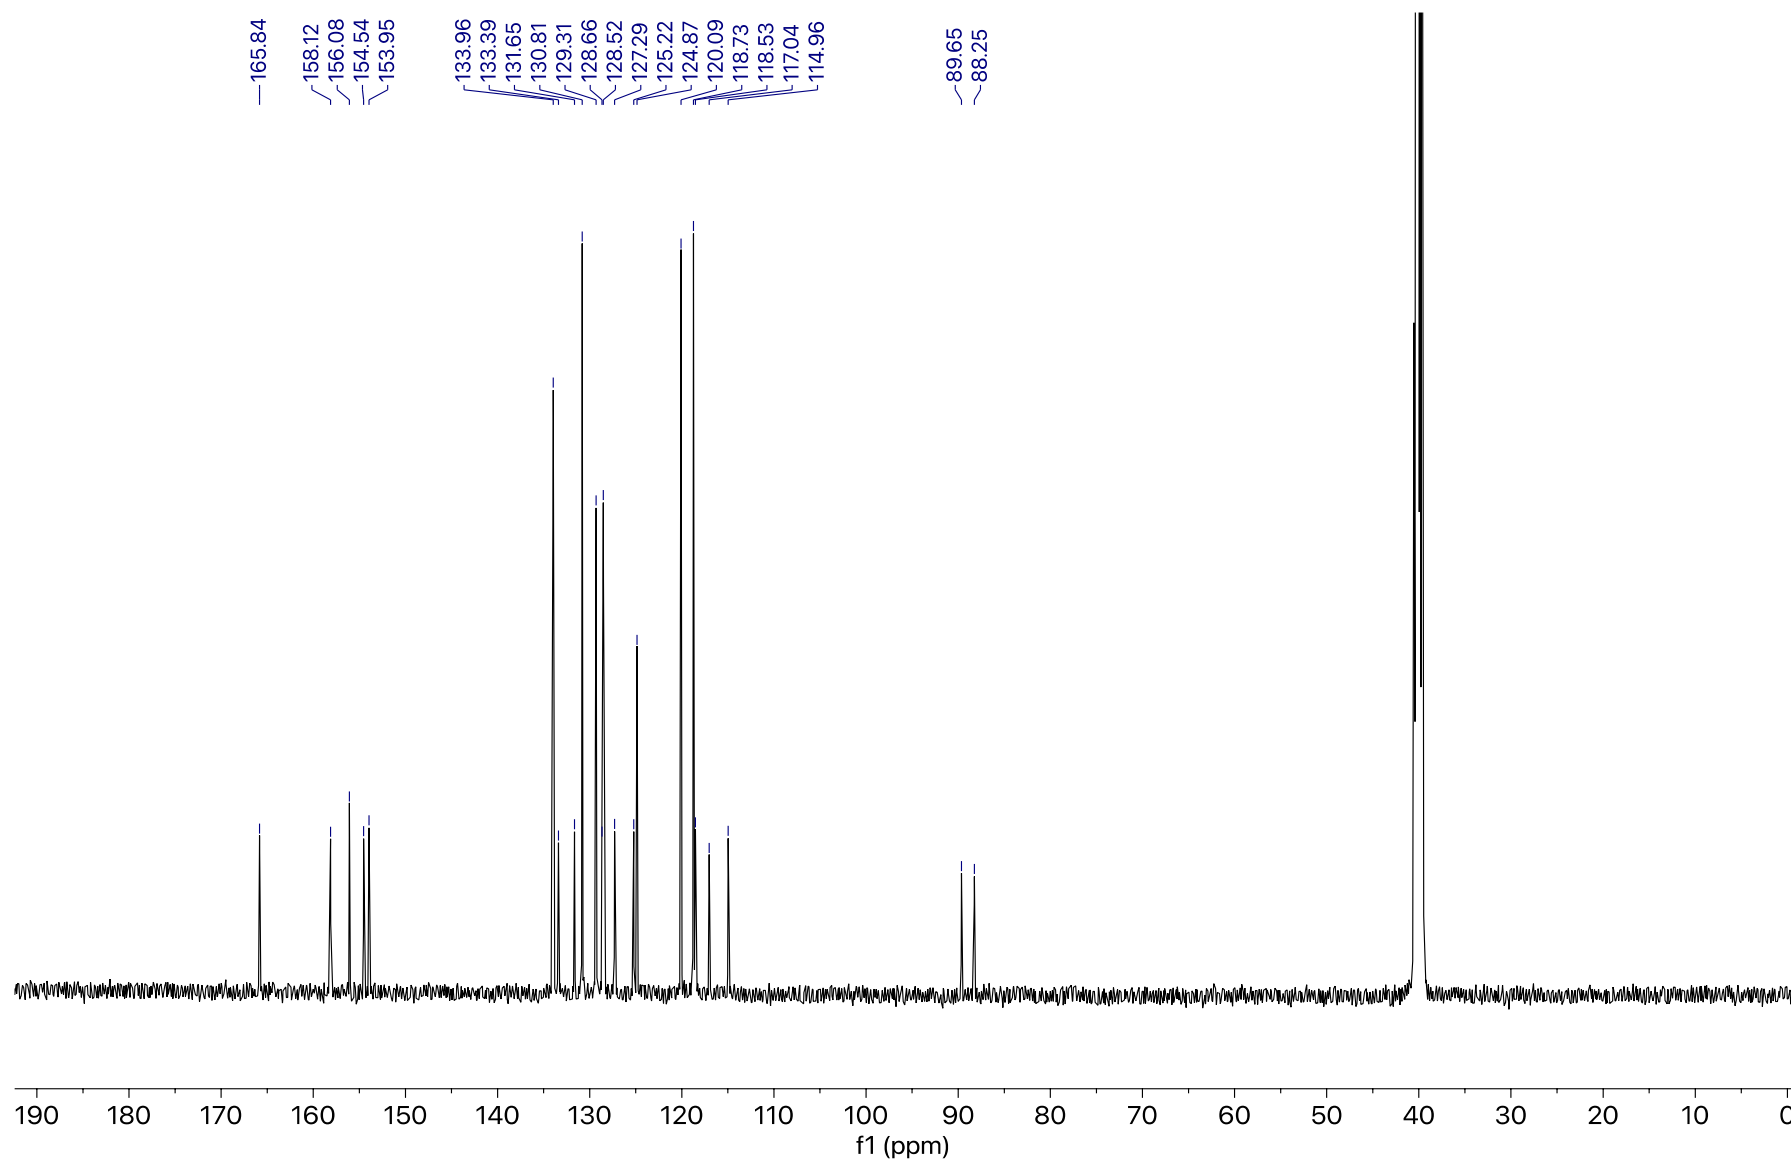

3-((1-benzamido-2,3-dioxo-1,2,3,4-tetrahydroquinoxalin-6-yl)ethynyl)benzoic acid (**14**)

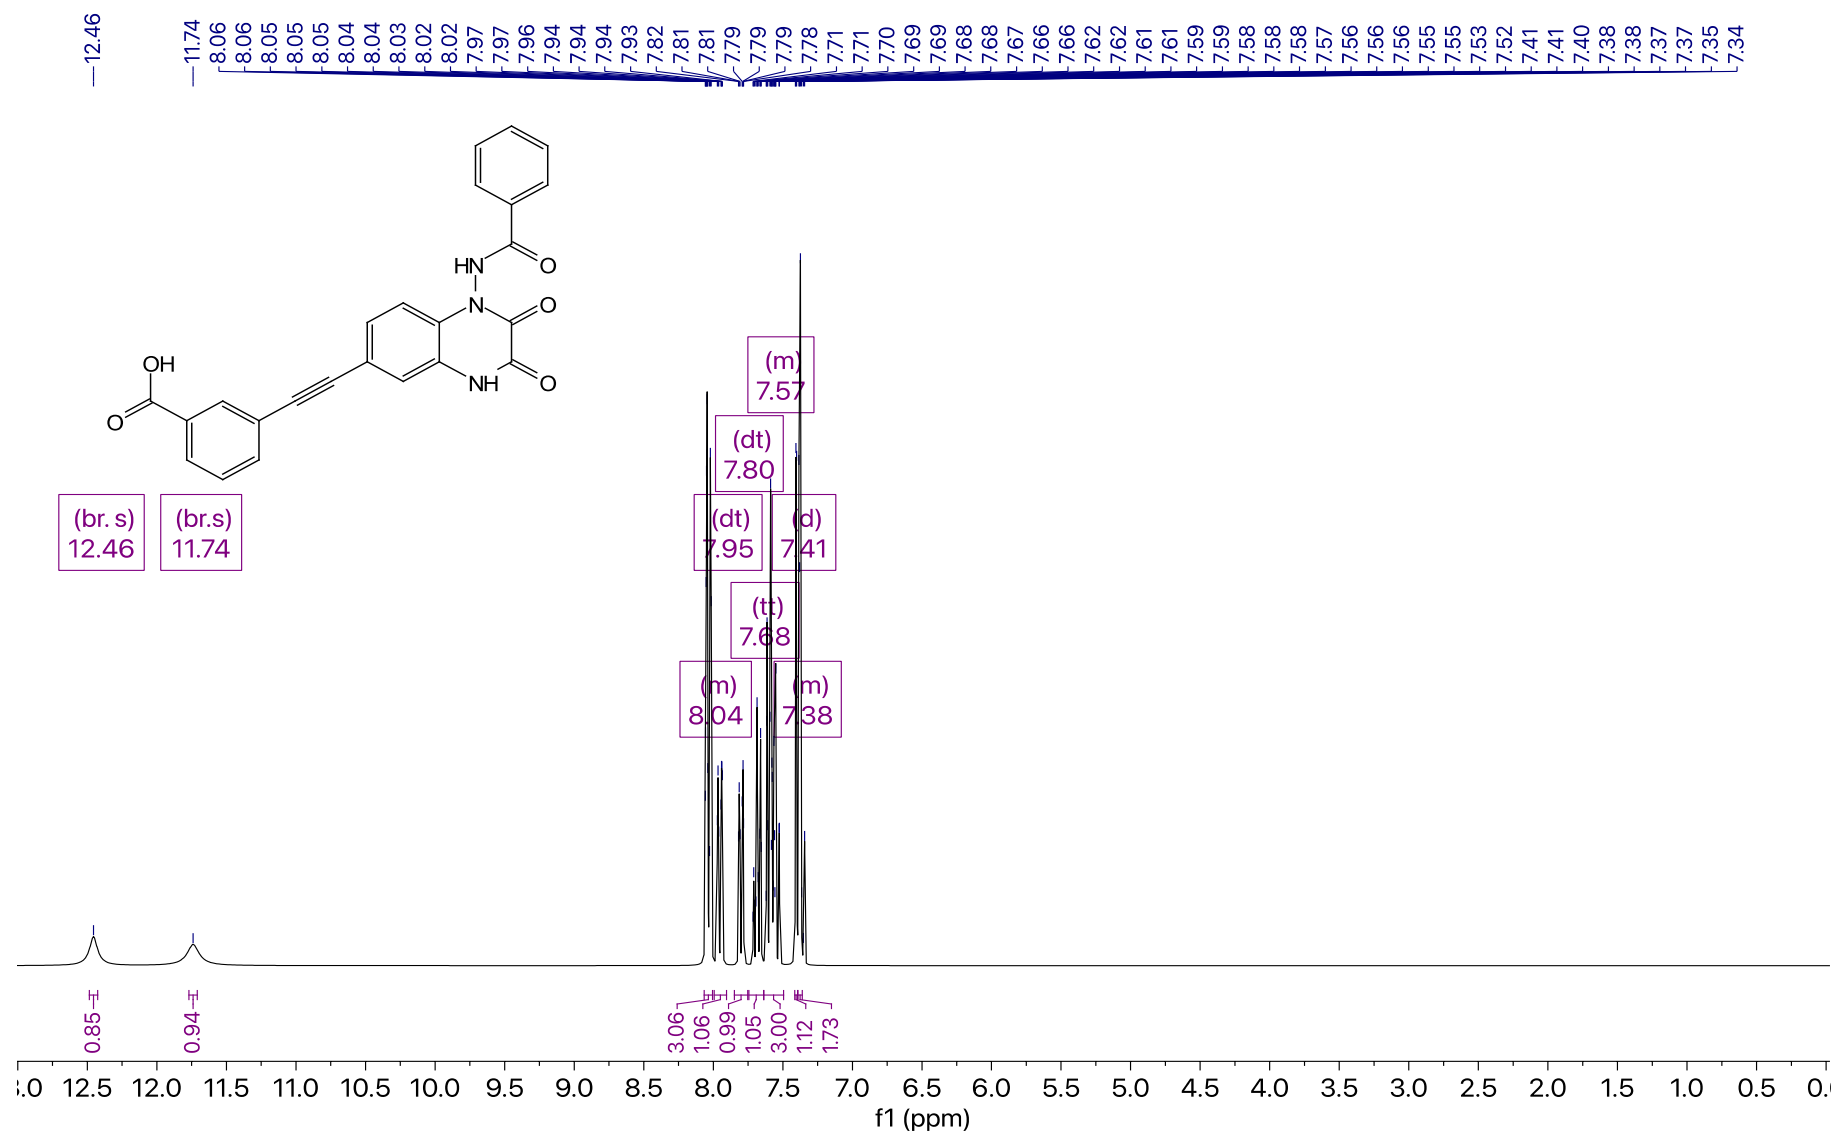



*3-((1-benzamido-2,3-dioxo-1,2,3,4-tetrahydroquinoxalin-6-yl)ethynyl)benzoic acid (14)*

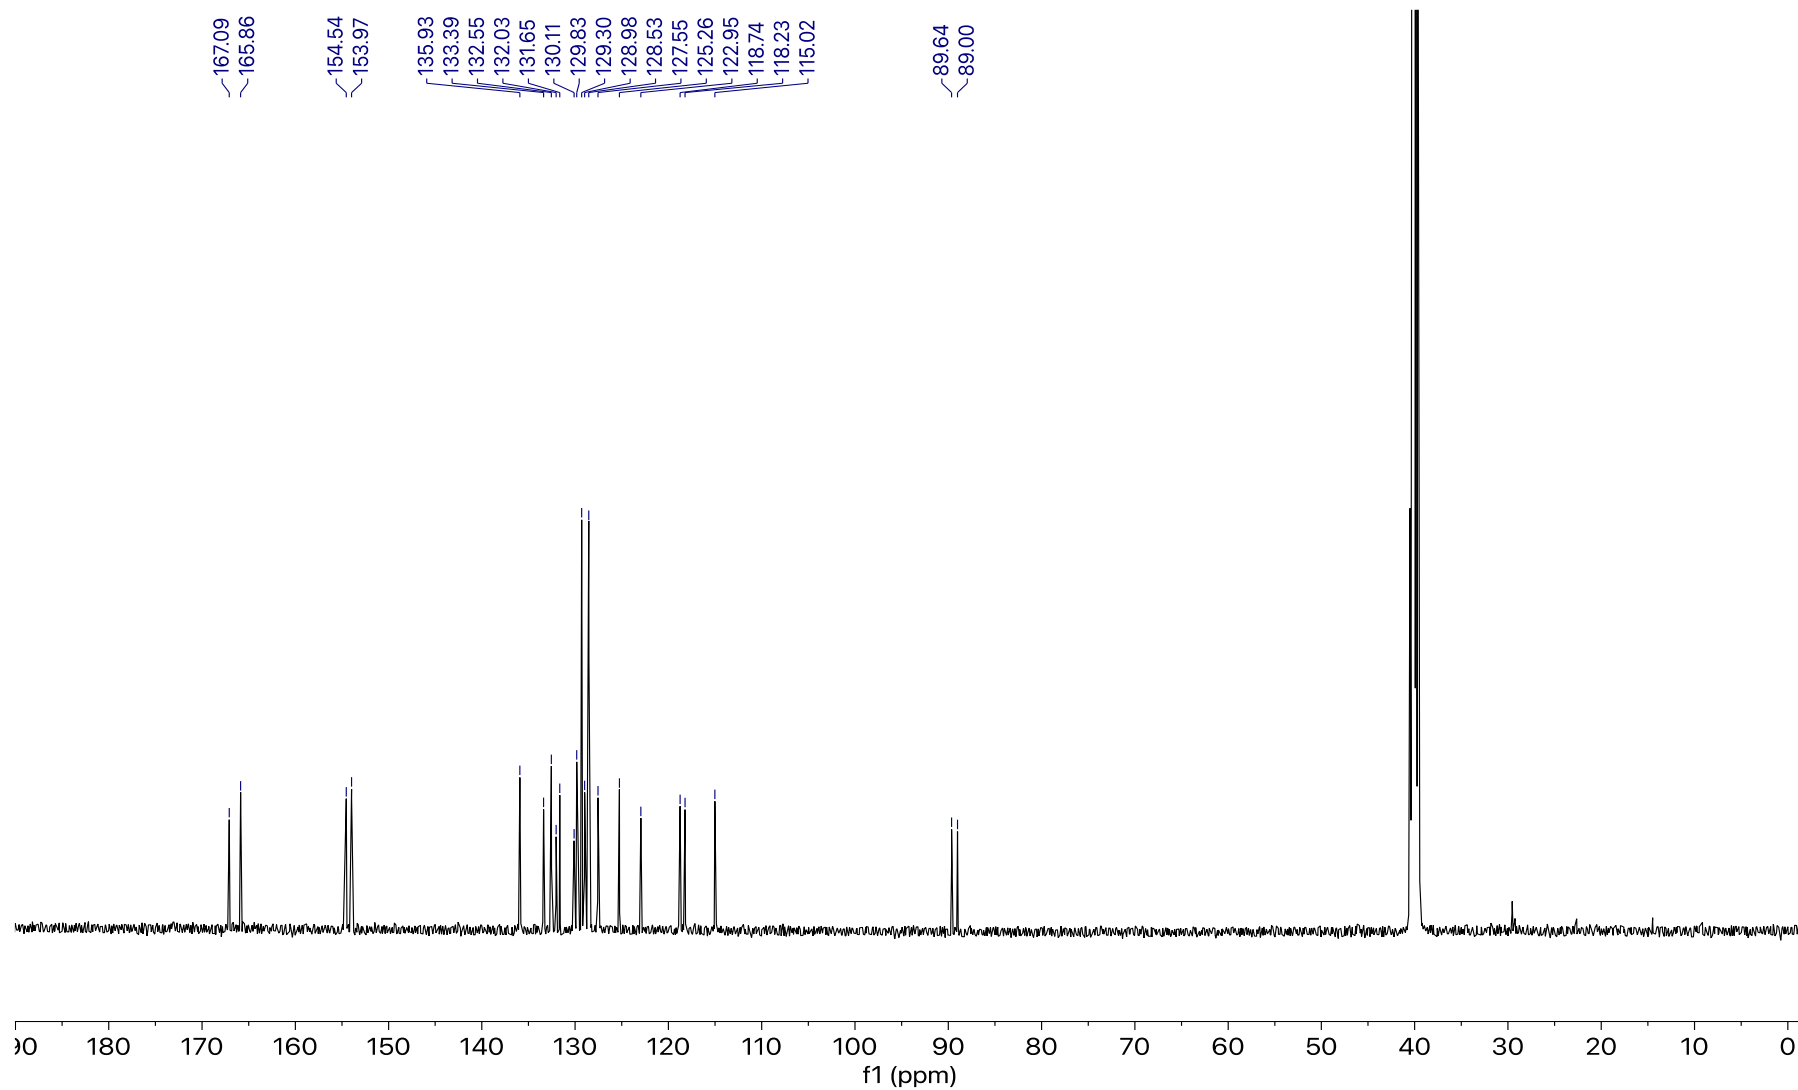

4-((1-benzamido-2,3-dioxo-1,2,3,4-tetrahydroquinoxalin-6-yl)ethynyl)benzoic acid (**15**)

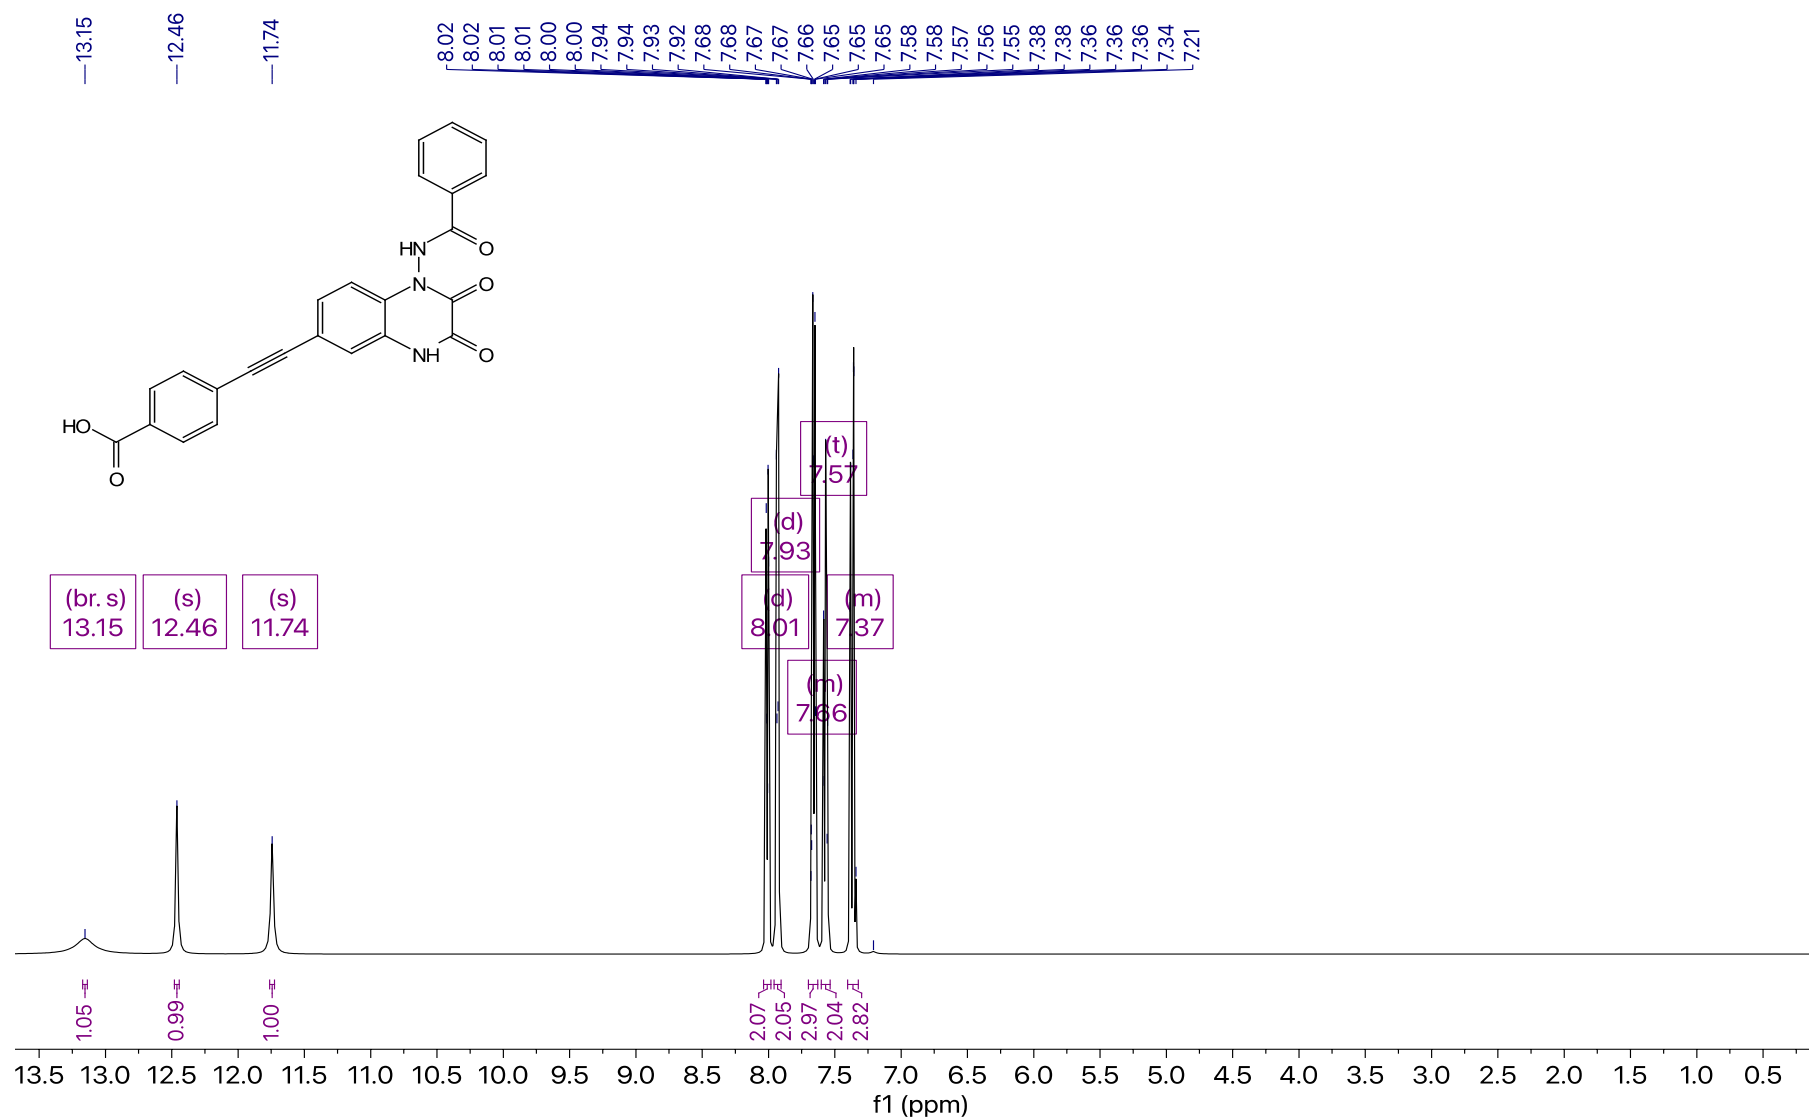

*4-((1-benzamido-2,3-dioxo-1,2,3,4-tetrahydroquinoxalin-6-yl)ethynyl)benzoic acid (15)*

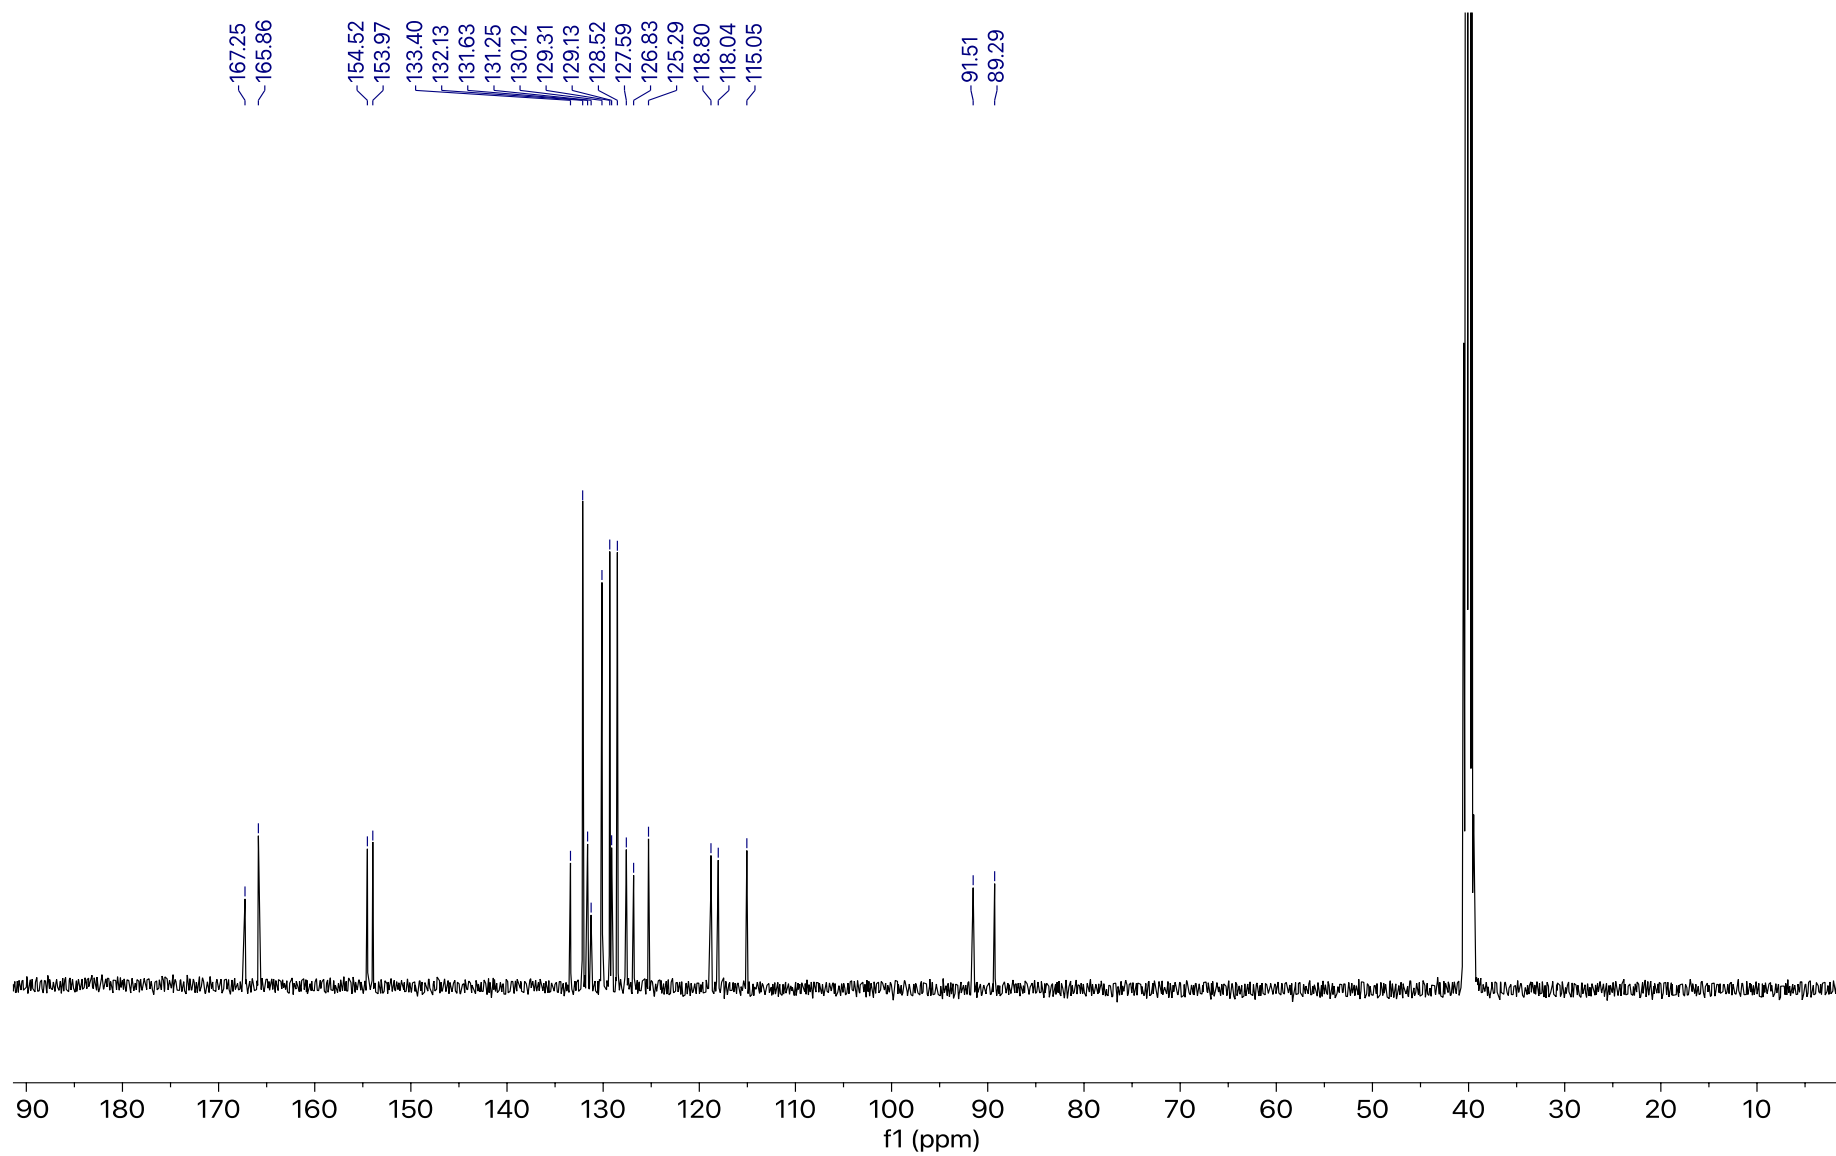

*N*-(2,3-dioxo-6-((4-sulfamoylphenyl)ethynyl)-3,4-dihydroquinoxalin-1(2*H*)-yl)benzamide (**16**)

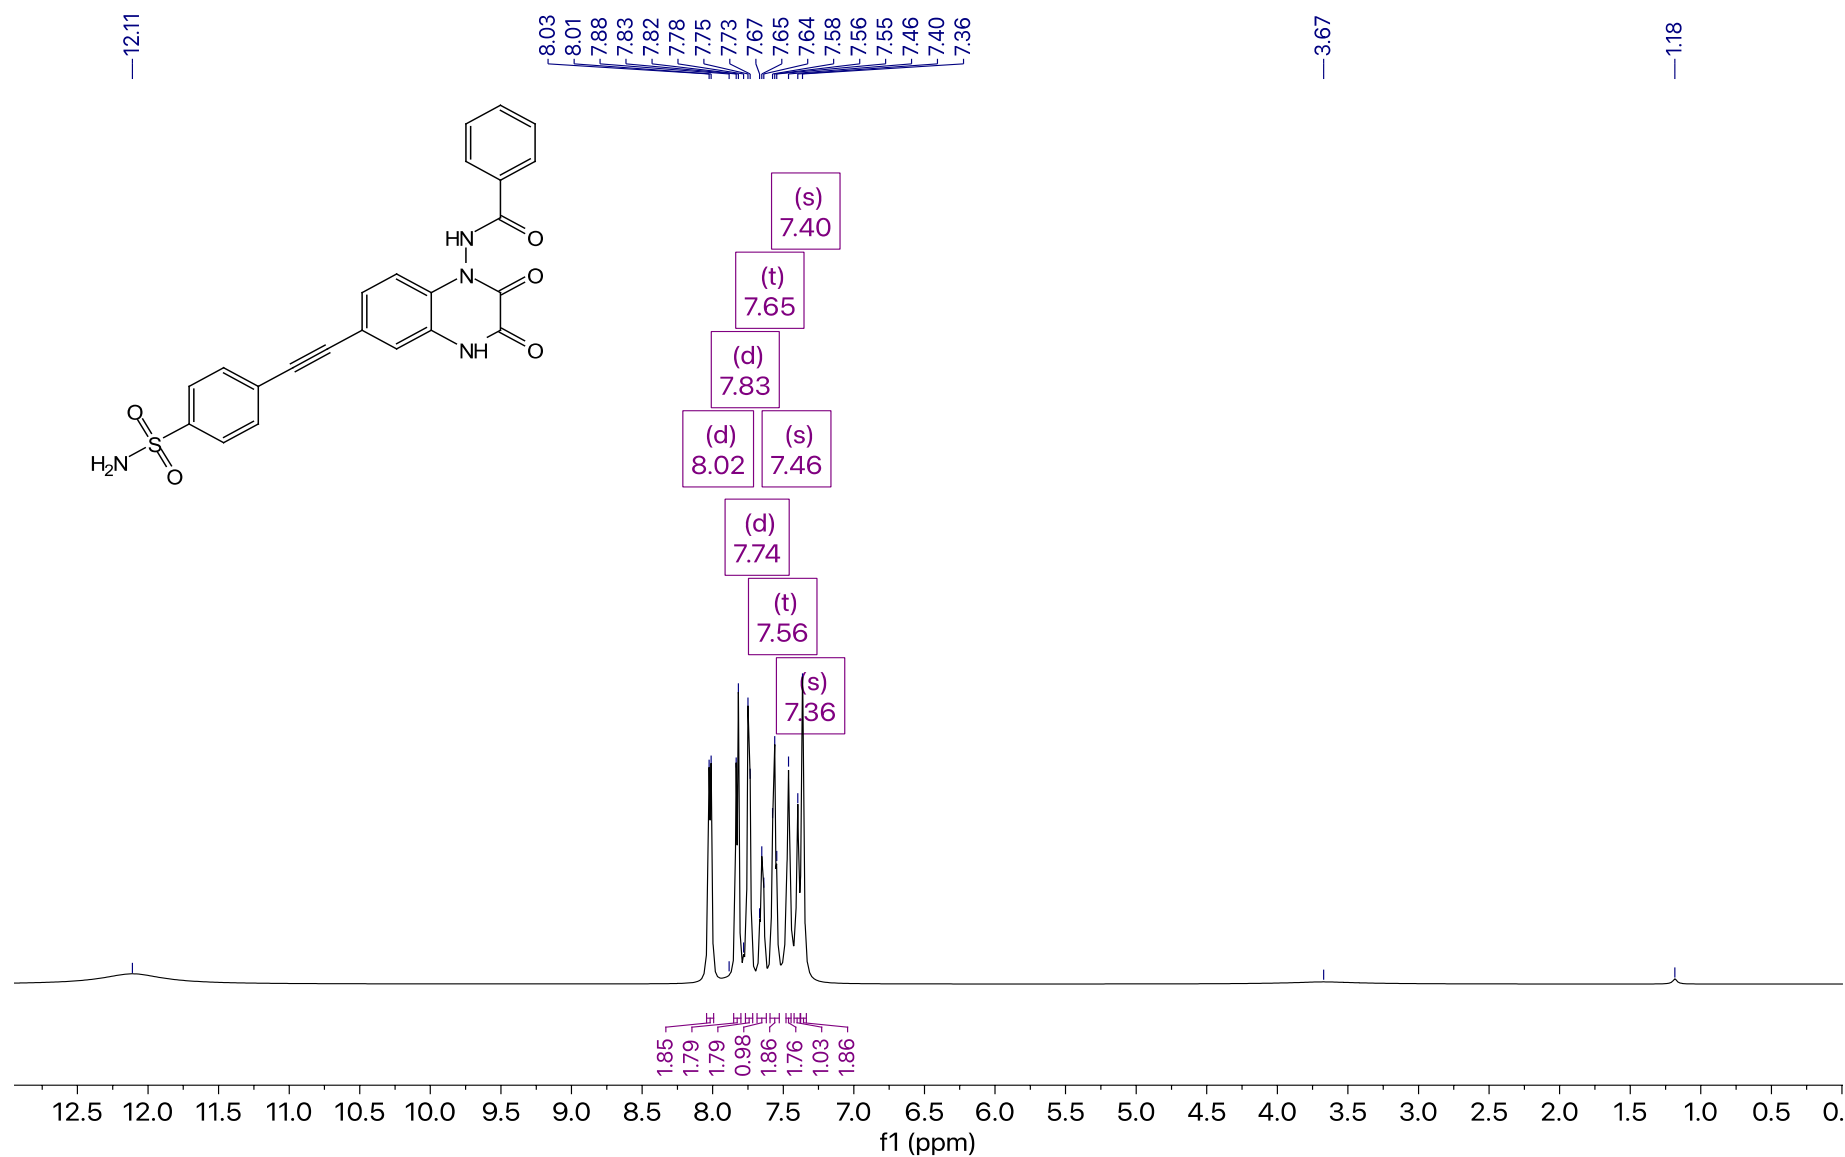

*N*-(2,3-dioxo-6-((4-sulfamoylphenyl)ethynyl)-3,4-dihydroquinoxalin-1(2*H*)-yl)benzamide (**16**)

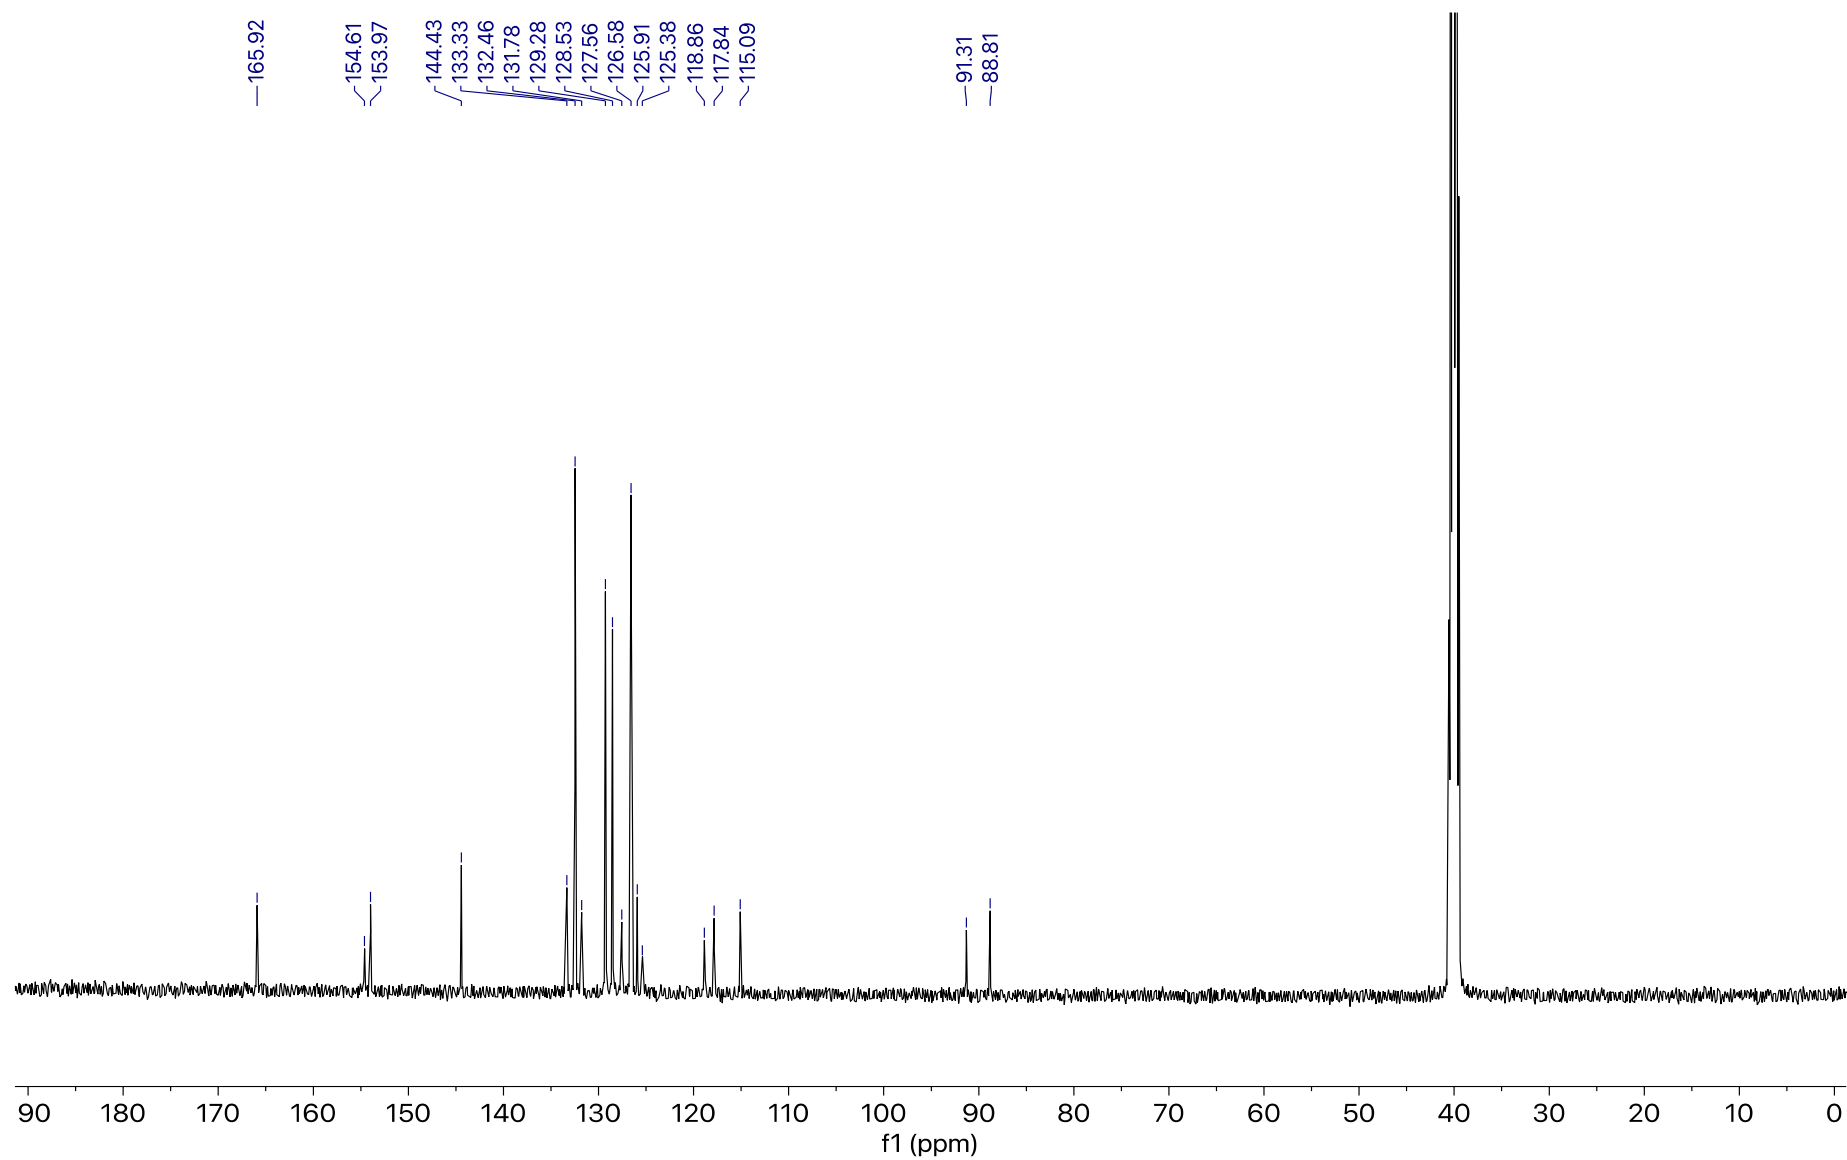

4-((1-benzamido-2,3-dioxo-1,2,3,4-tetrahydroquinoxalin-6-yl)ethynyl)benzenesulfonyl fluoride (**17**)

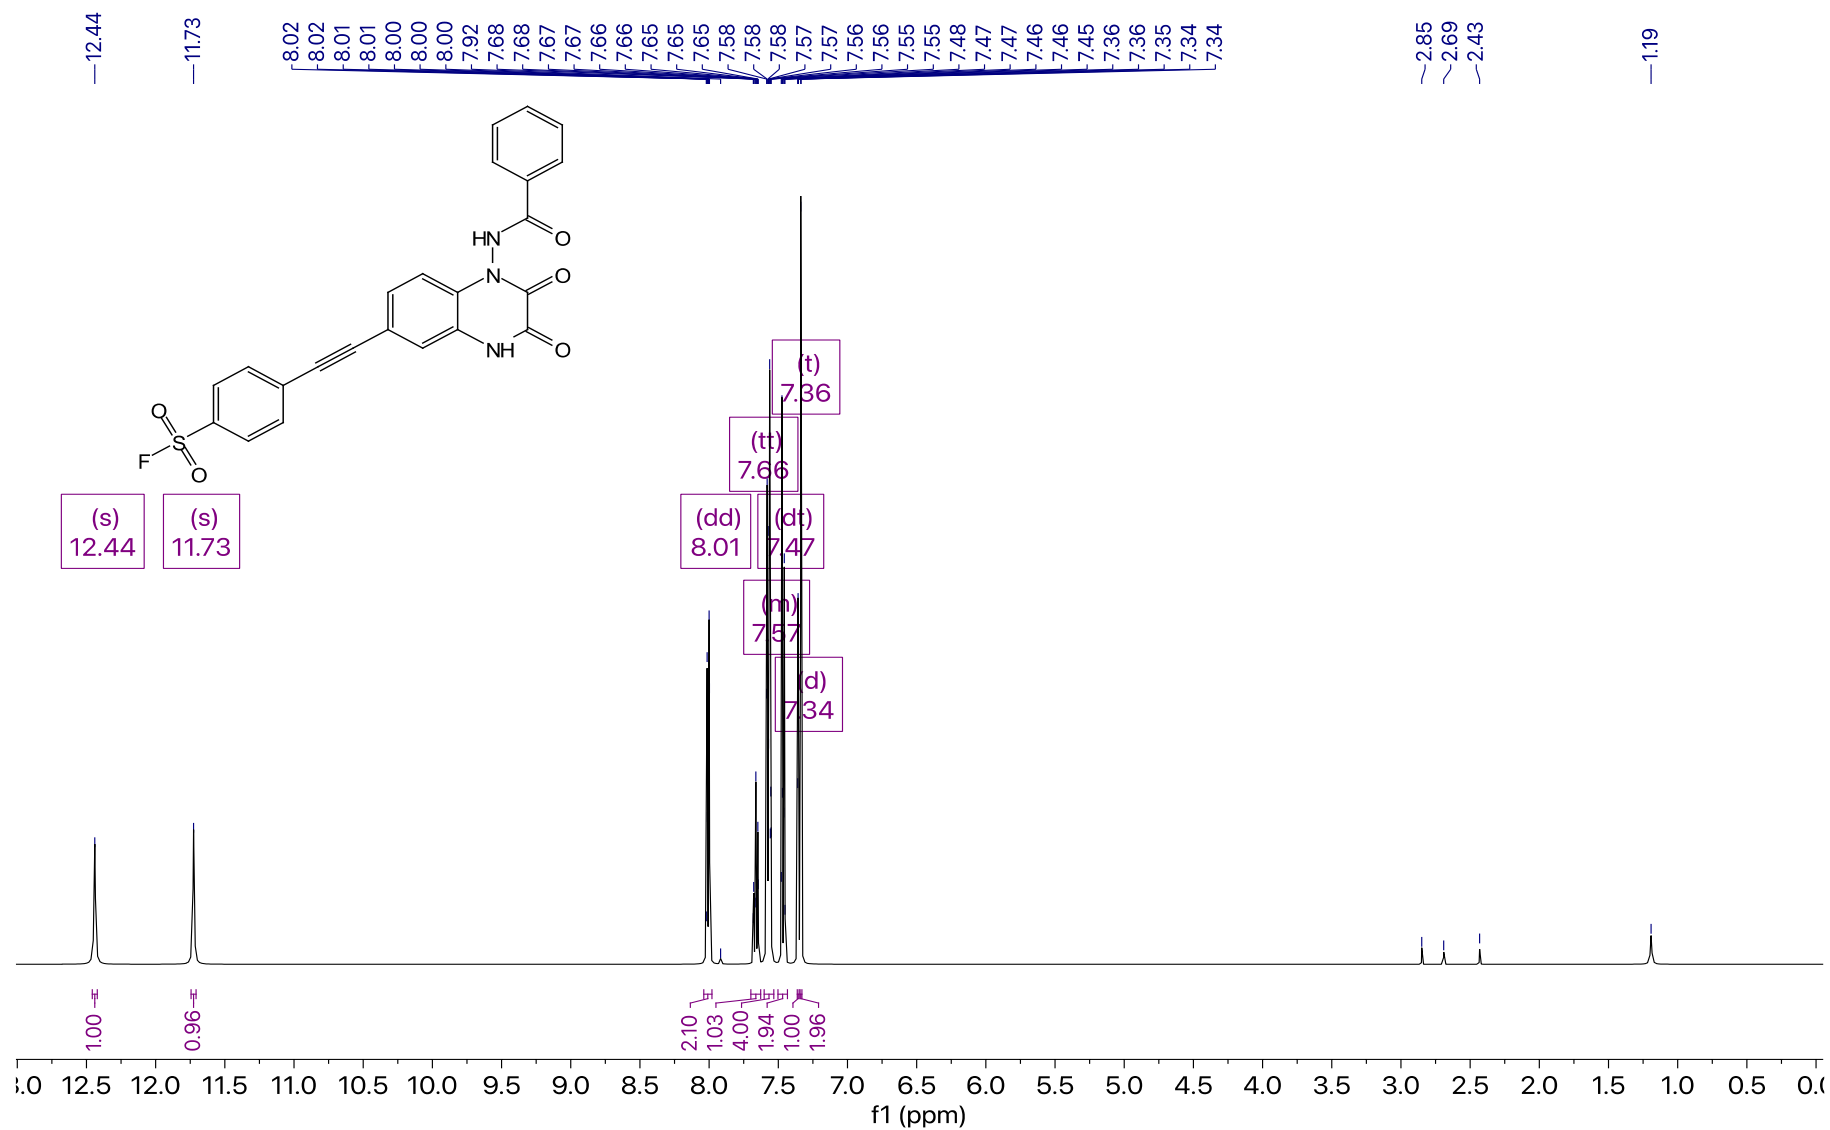

*4-((1-benzamido-2,3-dioxo-1,2,3,4-tetrahydroquinoxalin-6-yl)ethynyl)benzenesulfonyl fluoride (17)*

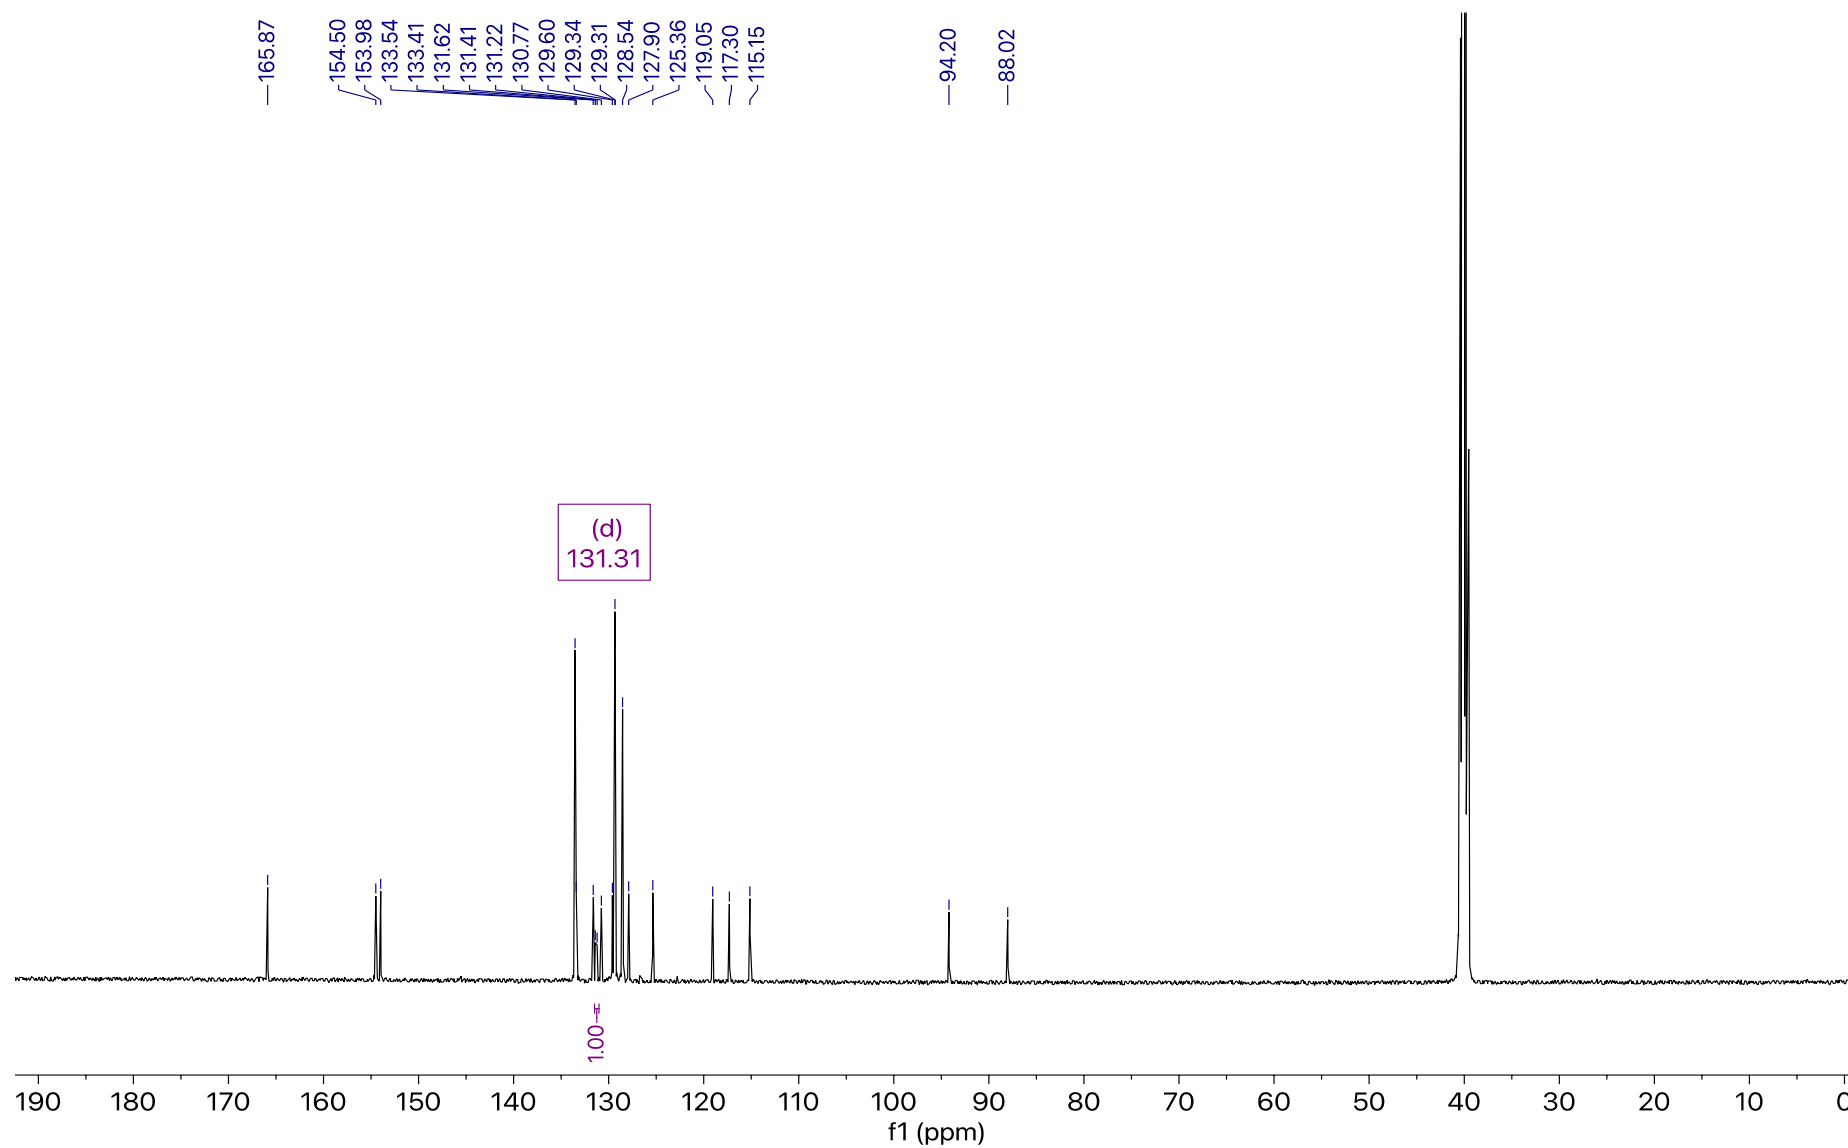

*N*-(6-((2-hydroxyphenyl)ethynyl)-2,3-dioxo-3,4-dihydroquinoxalin-1(2*H*)-yl)benzamide (**18**)

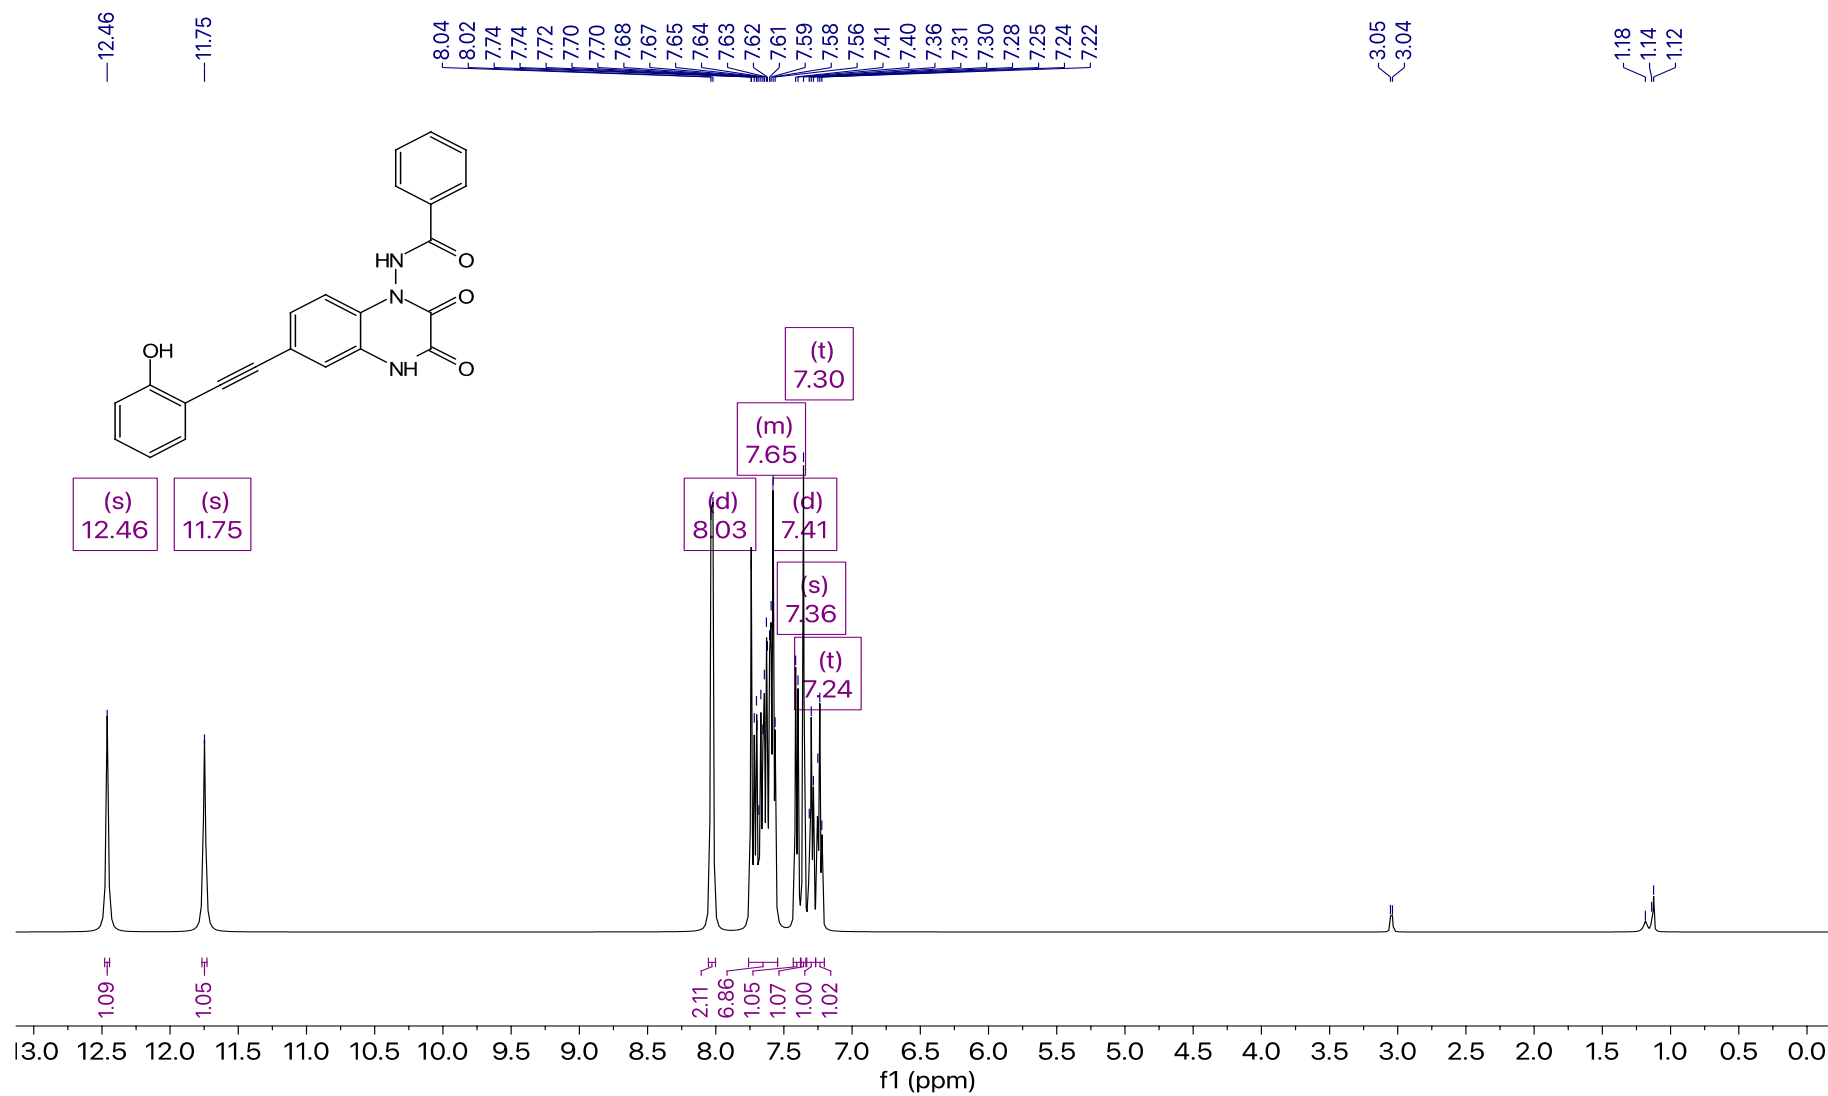

*N*-(6-((2-hydroxyphenyl)ethynyl)-2,3-dioxo-3,4-dihydroquinoxalin-1(2*H*)-yl)benzamide (**18**)



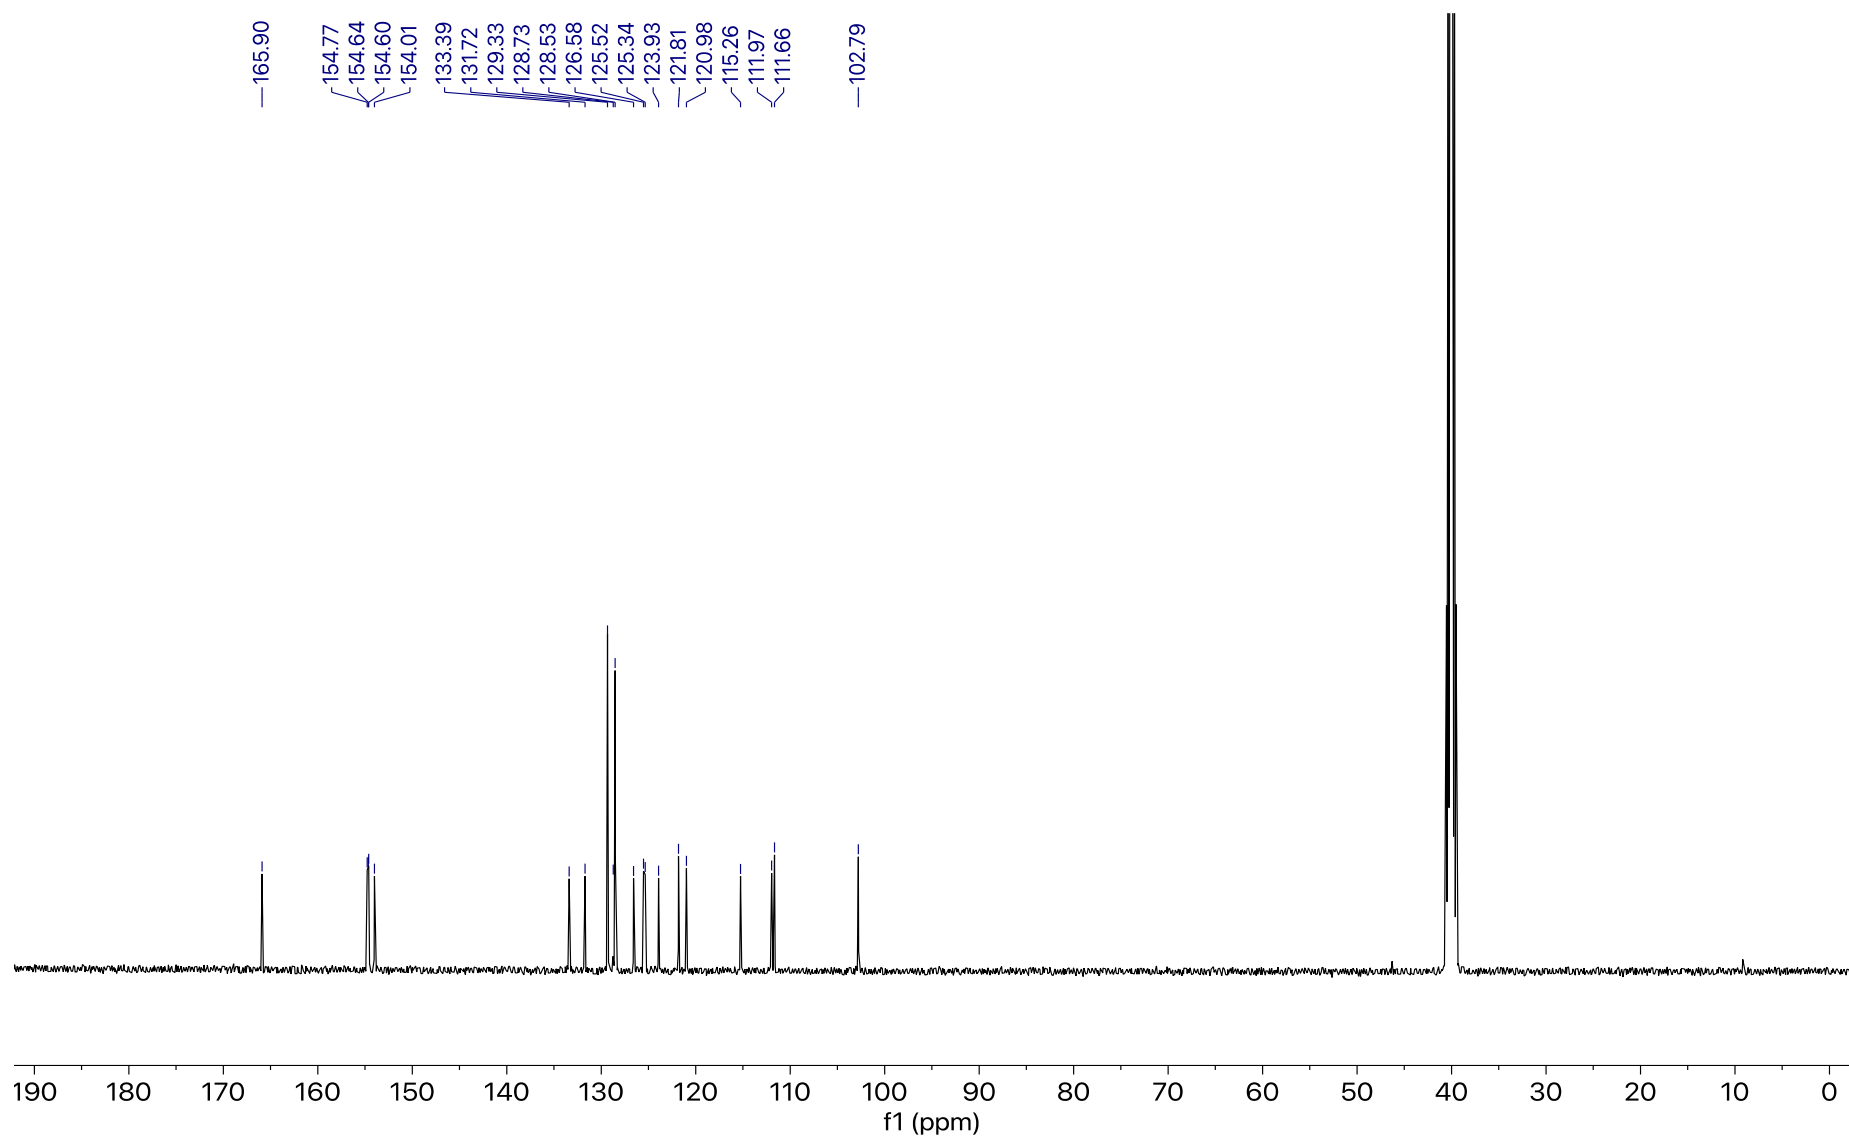

*N*-(6-((2-hydroxyphenyl)ethynyl)-2,3-dioxo-3,4-dihydroquinoxalin-1(2H)-yl)benzamide (**18**)

*N*-(6-((3-hydroxyphenyl)ethynyl)-2,3-dioxo-3,4-dihydroquinoxalin-1(2*H*)-yl)benzamide (**19**)

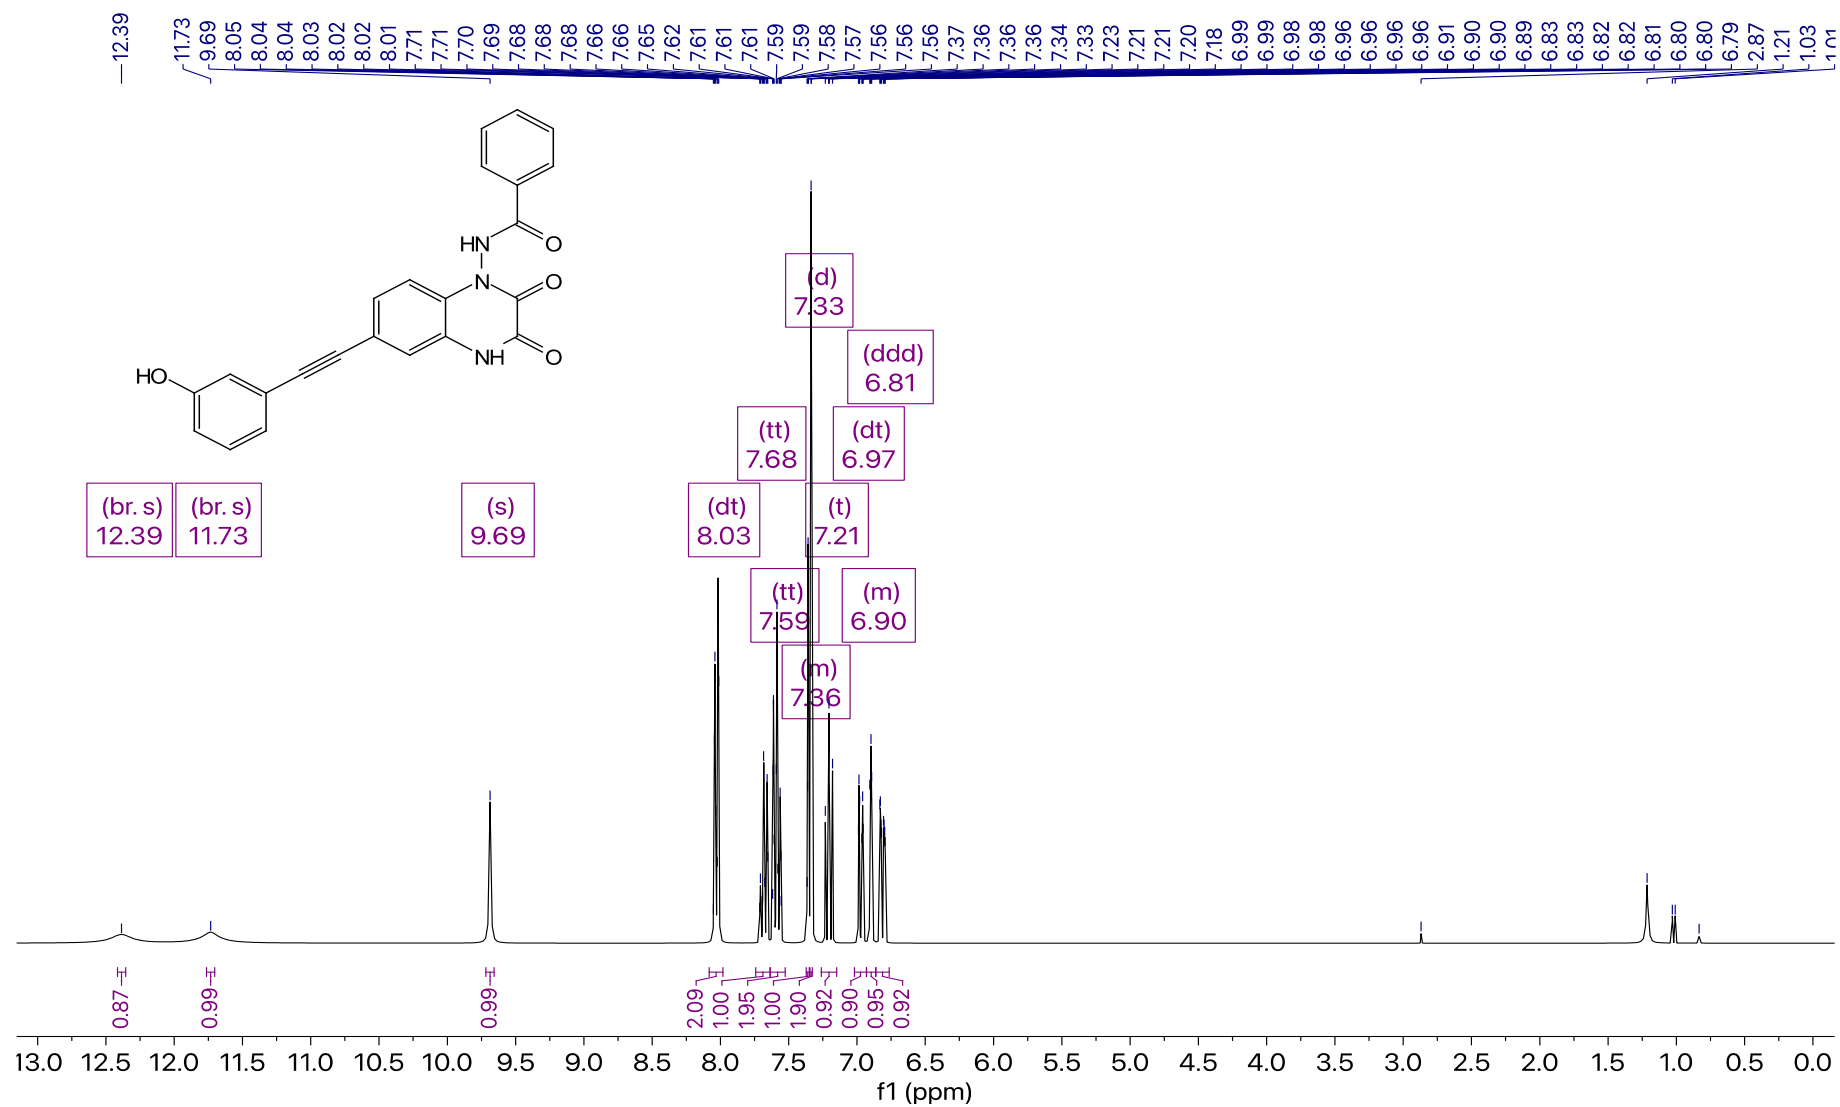

*N*-(6-((3-hydroxyphenyl)ethynyl)-2,3-dioxo-3,4-dihydroquinoxalin-1(2*H*)-yl)benzamide (**19**)

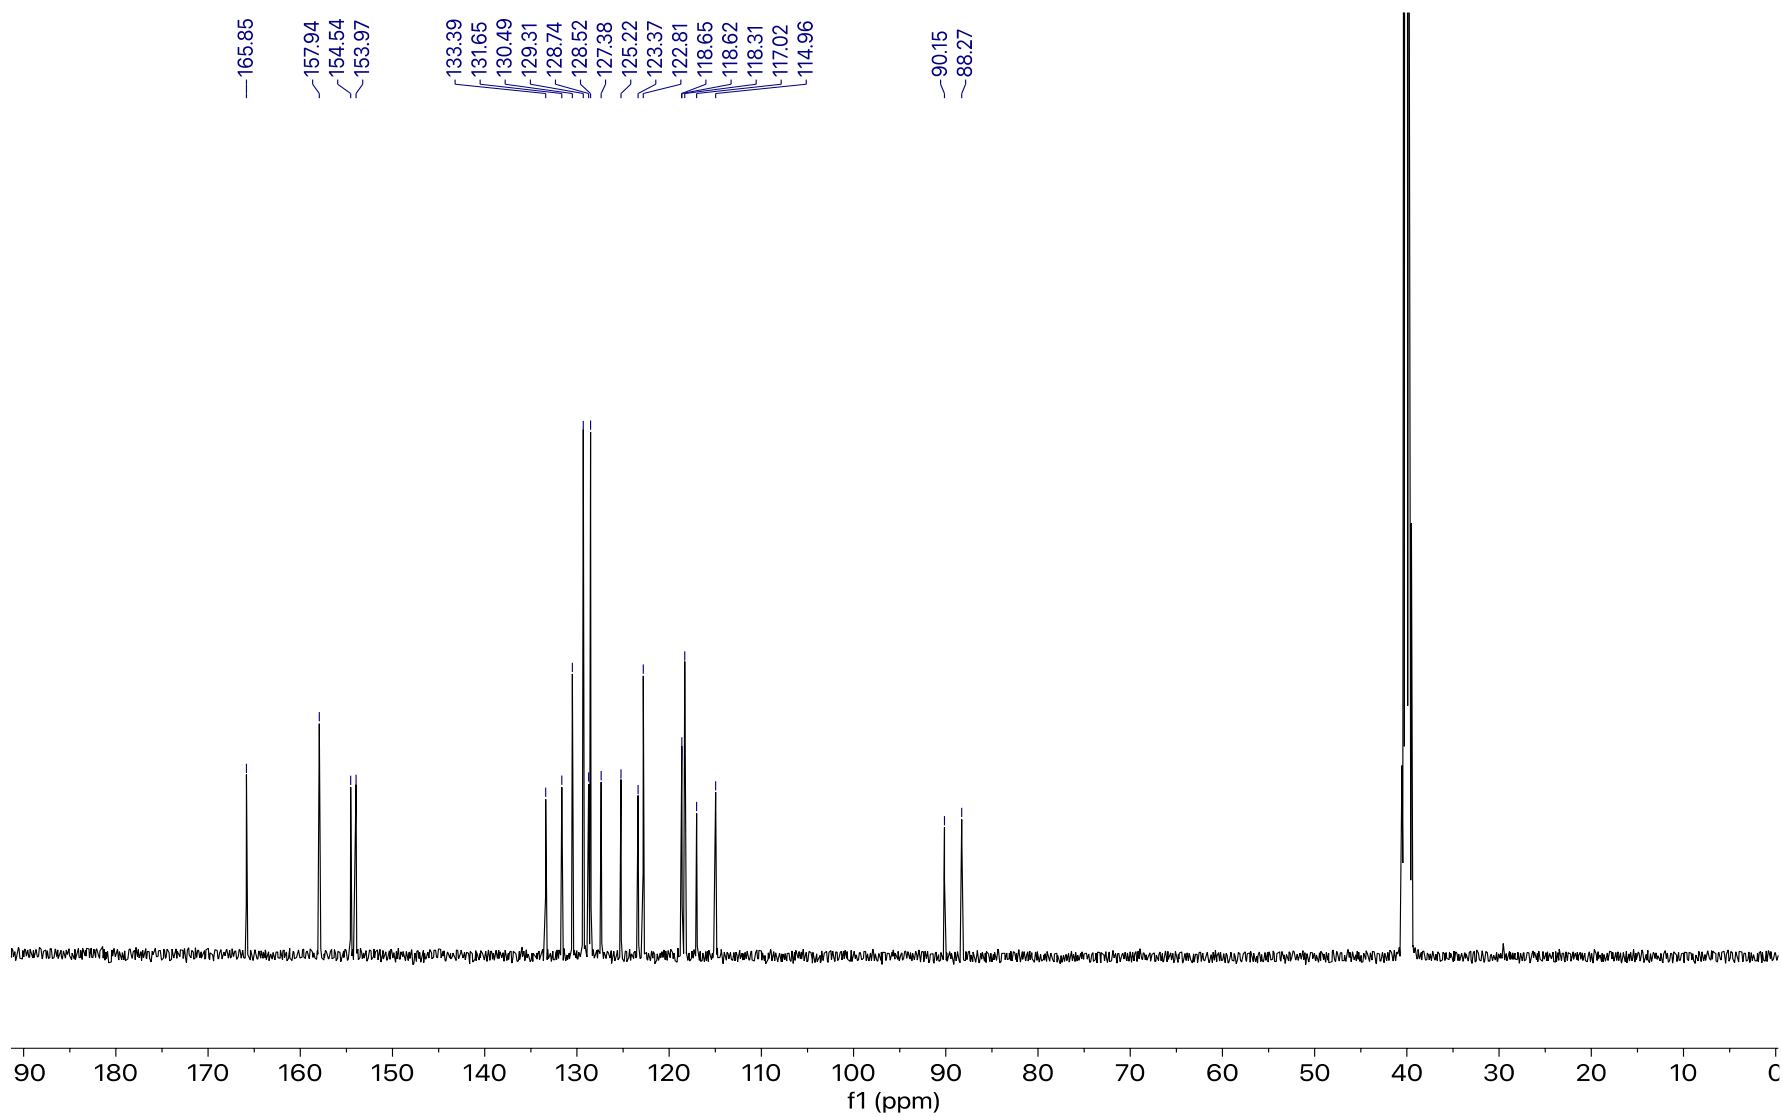

*N*-(6-((4-(hydroxymethyl)phenyl)ethynyl)-2,3-dioxo-3,4-dihydroquinoxalin-1(2*H*)-yl)benzamide (**20**)

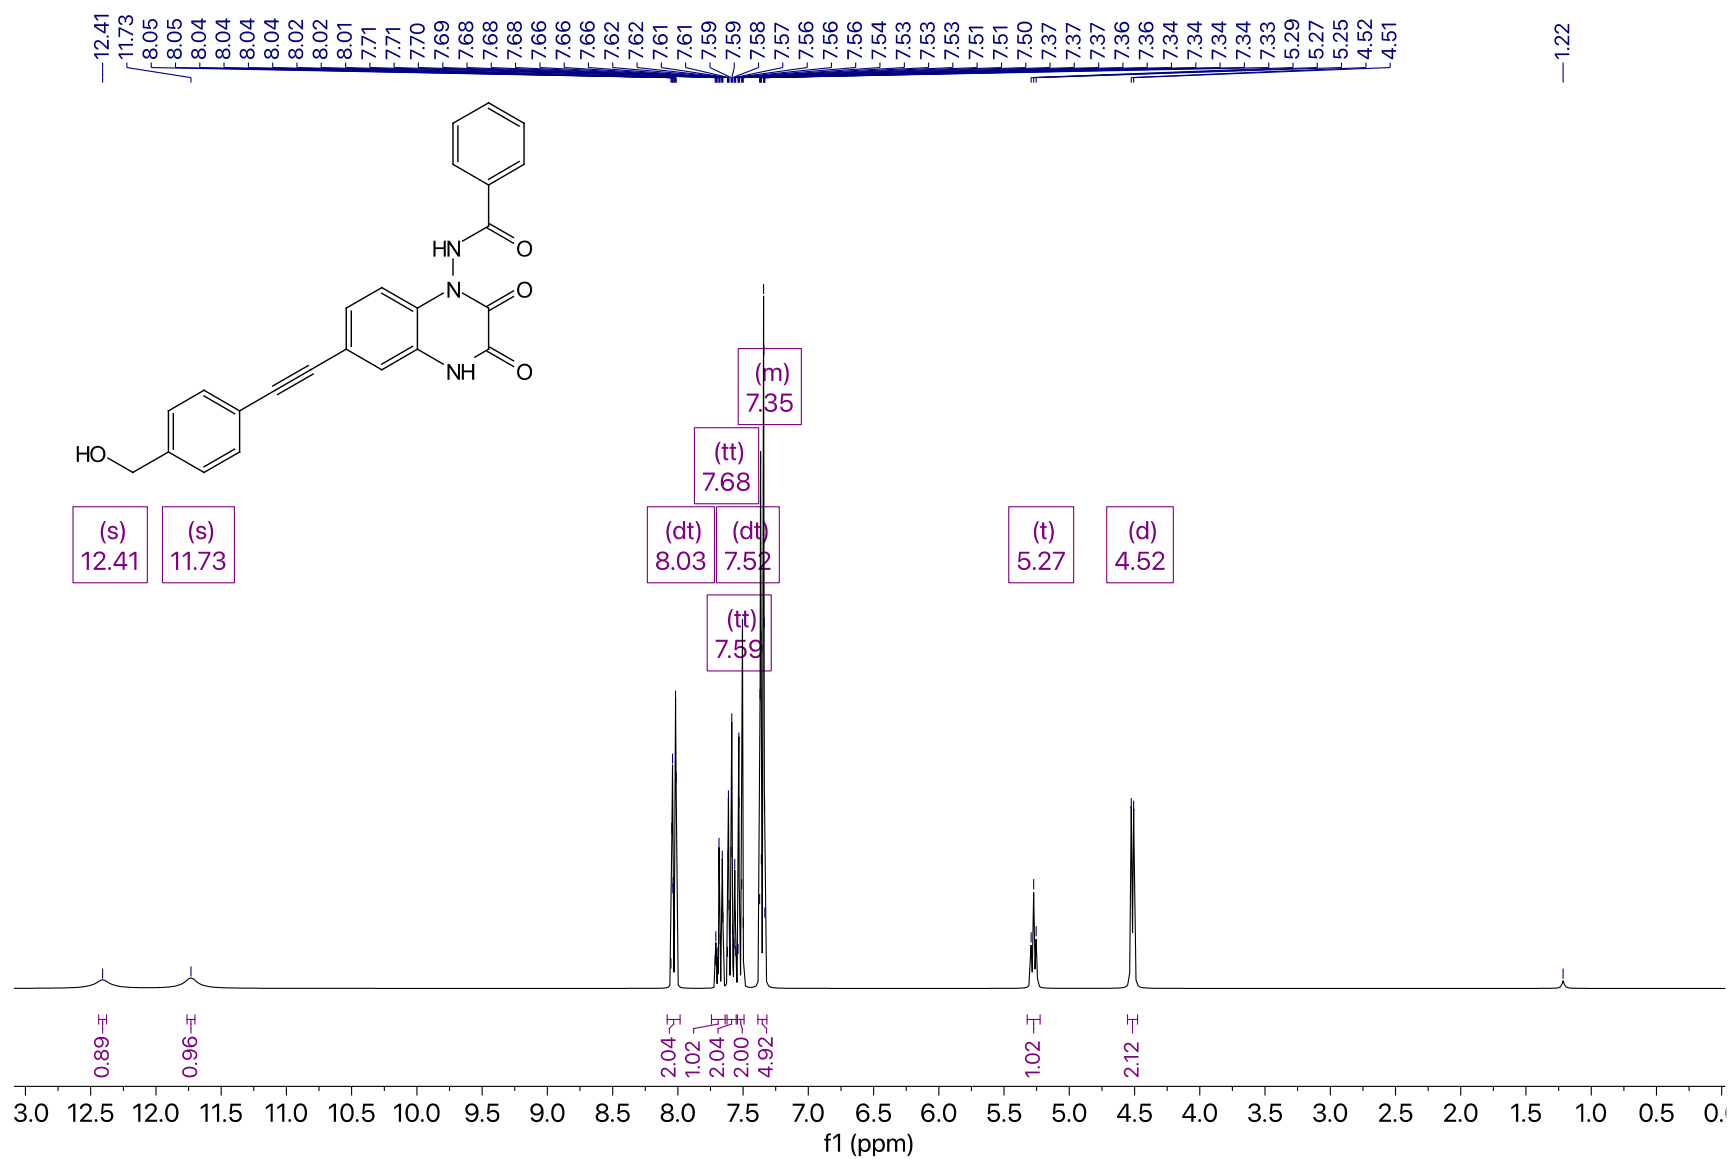

*N*-(6-((4-(hydroxymethyl)phenyl)ethynyl)-2,3-dioxo-3,4-dihydroquinoxalin-1(2*H*)-yl)benzamide (**20**)

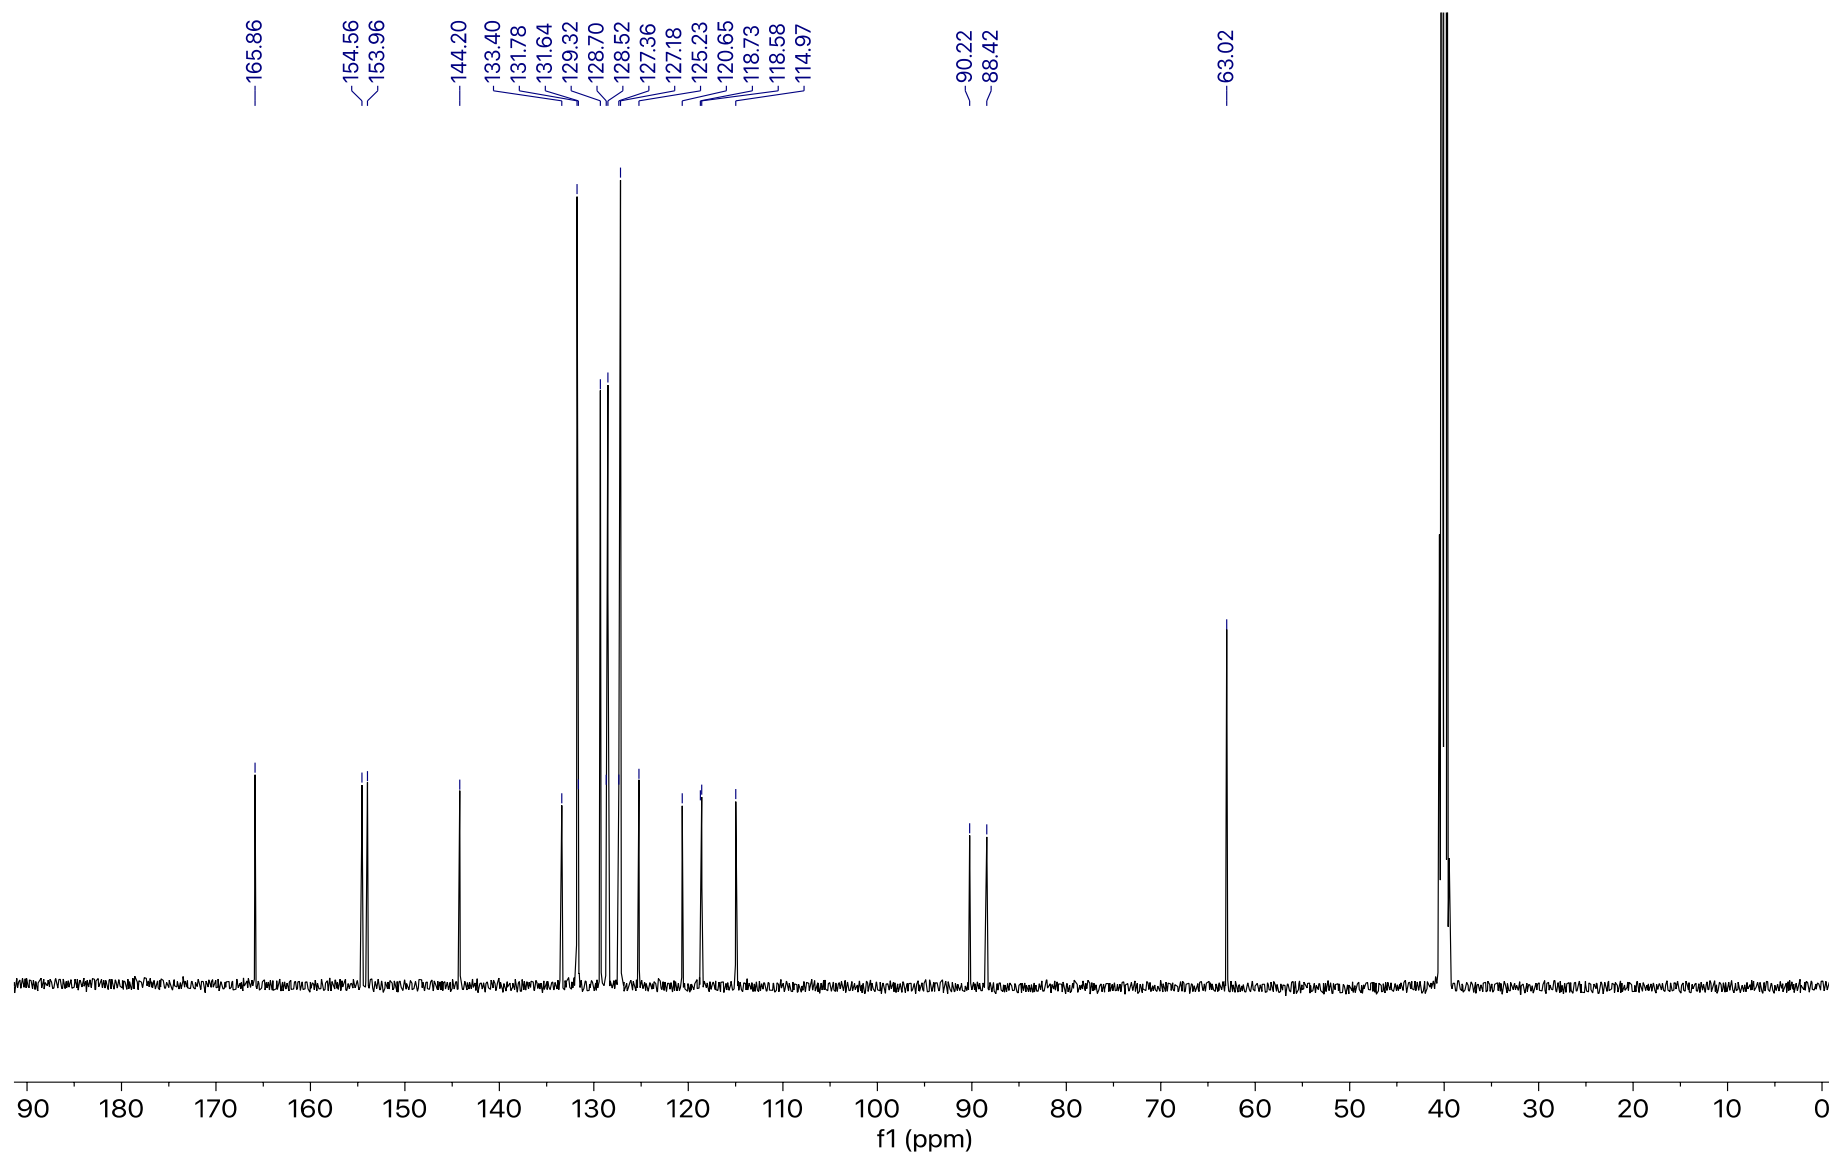

*N*-(6-((2-aminophenyl)ethynyl)-2,3-dioxo-3,4-dihydroquinoxalin-1(2*H*)-yl)benzamide (**21**)

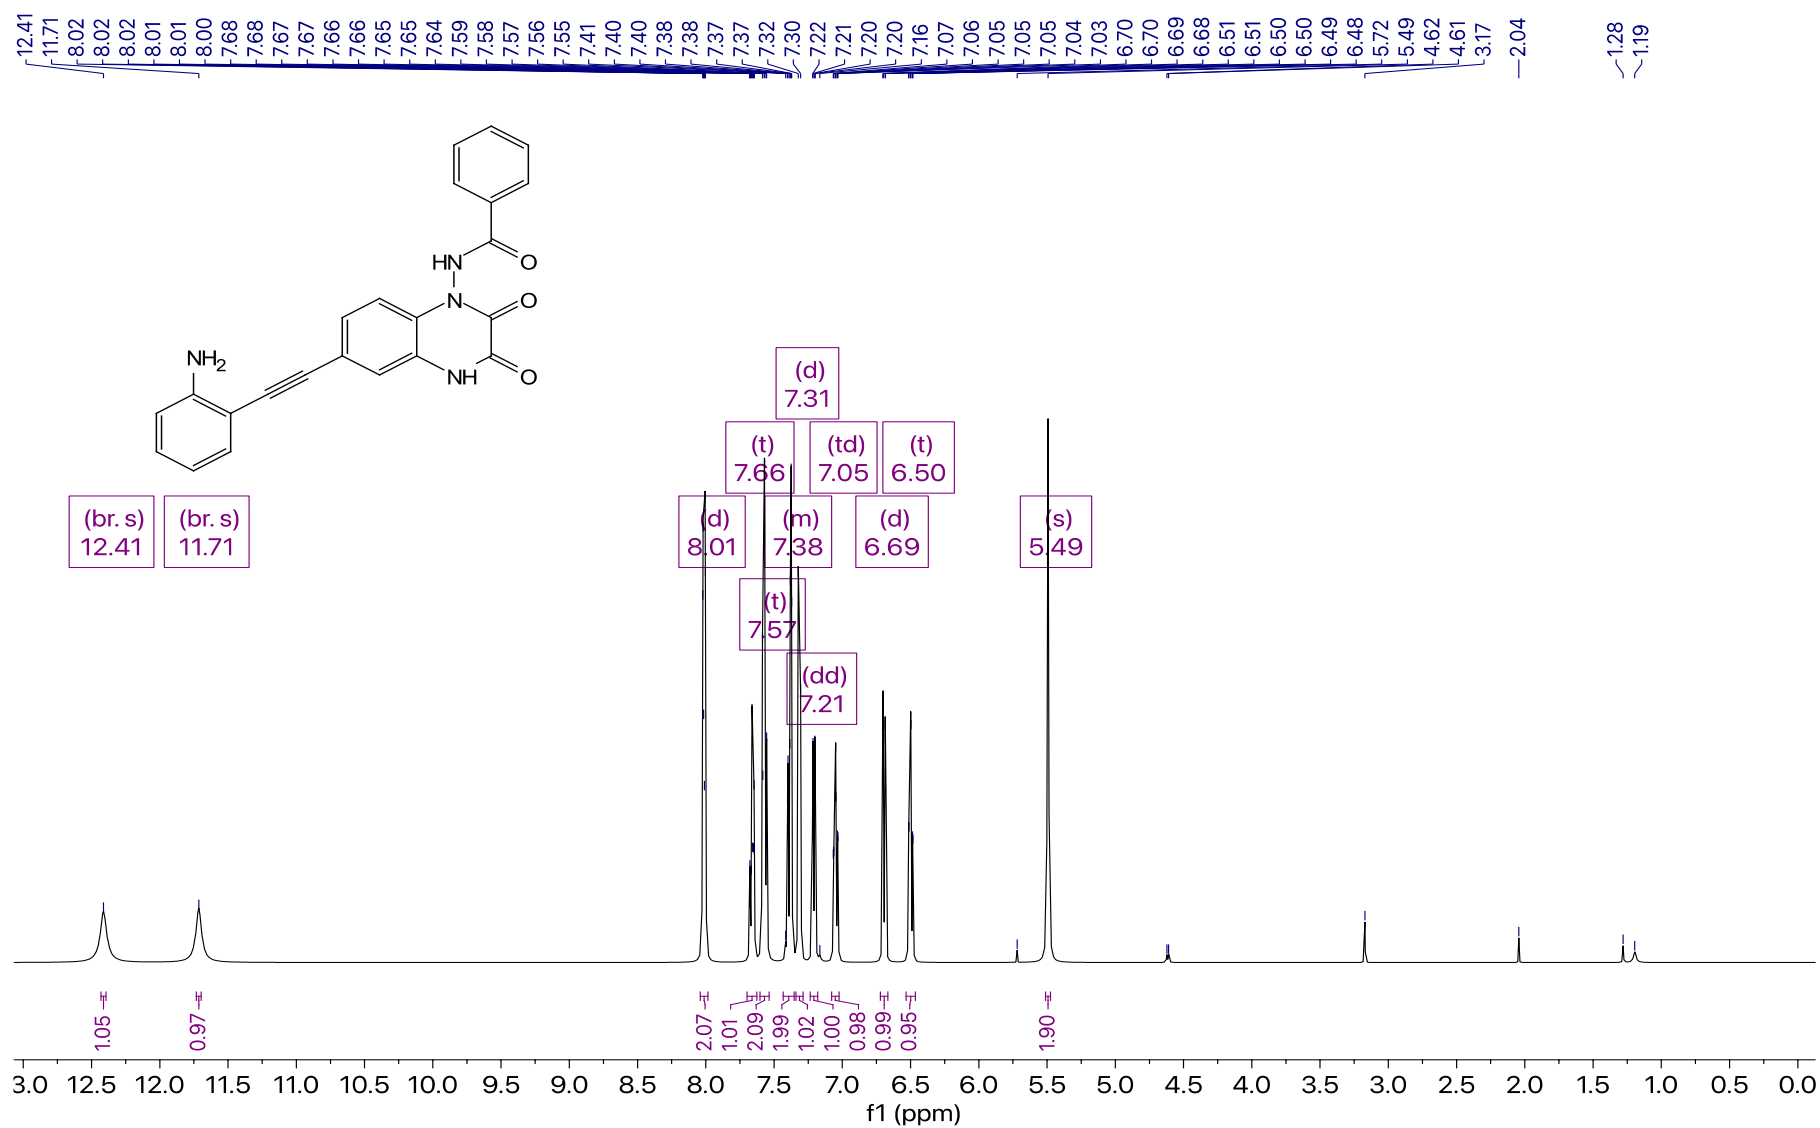

*N*-(6-((2-aminophenyl)ethynyl)-2,3-dioxo-3,4-dihydroquinoxalin-1(2*H*)-yl)benzamide (**21**)

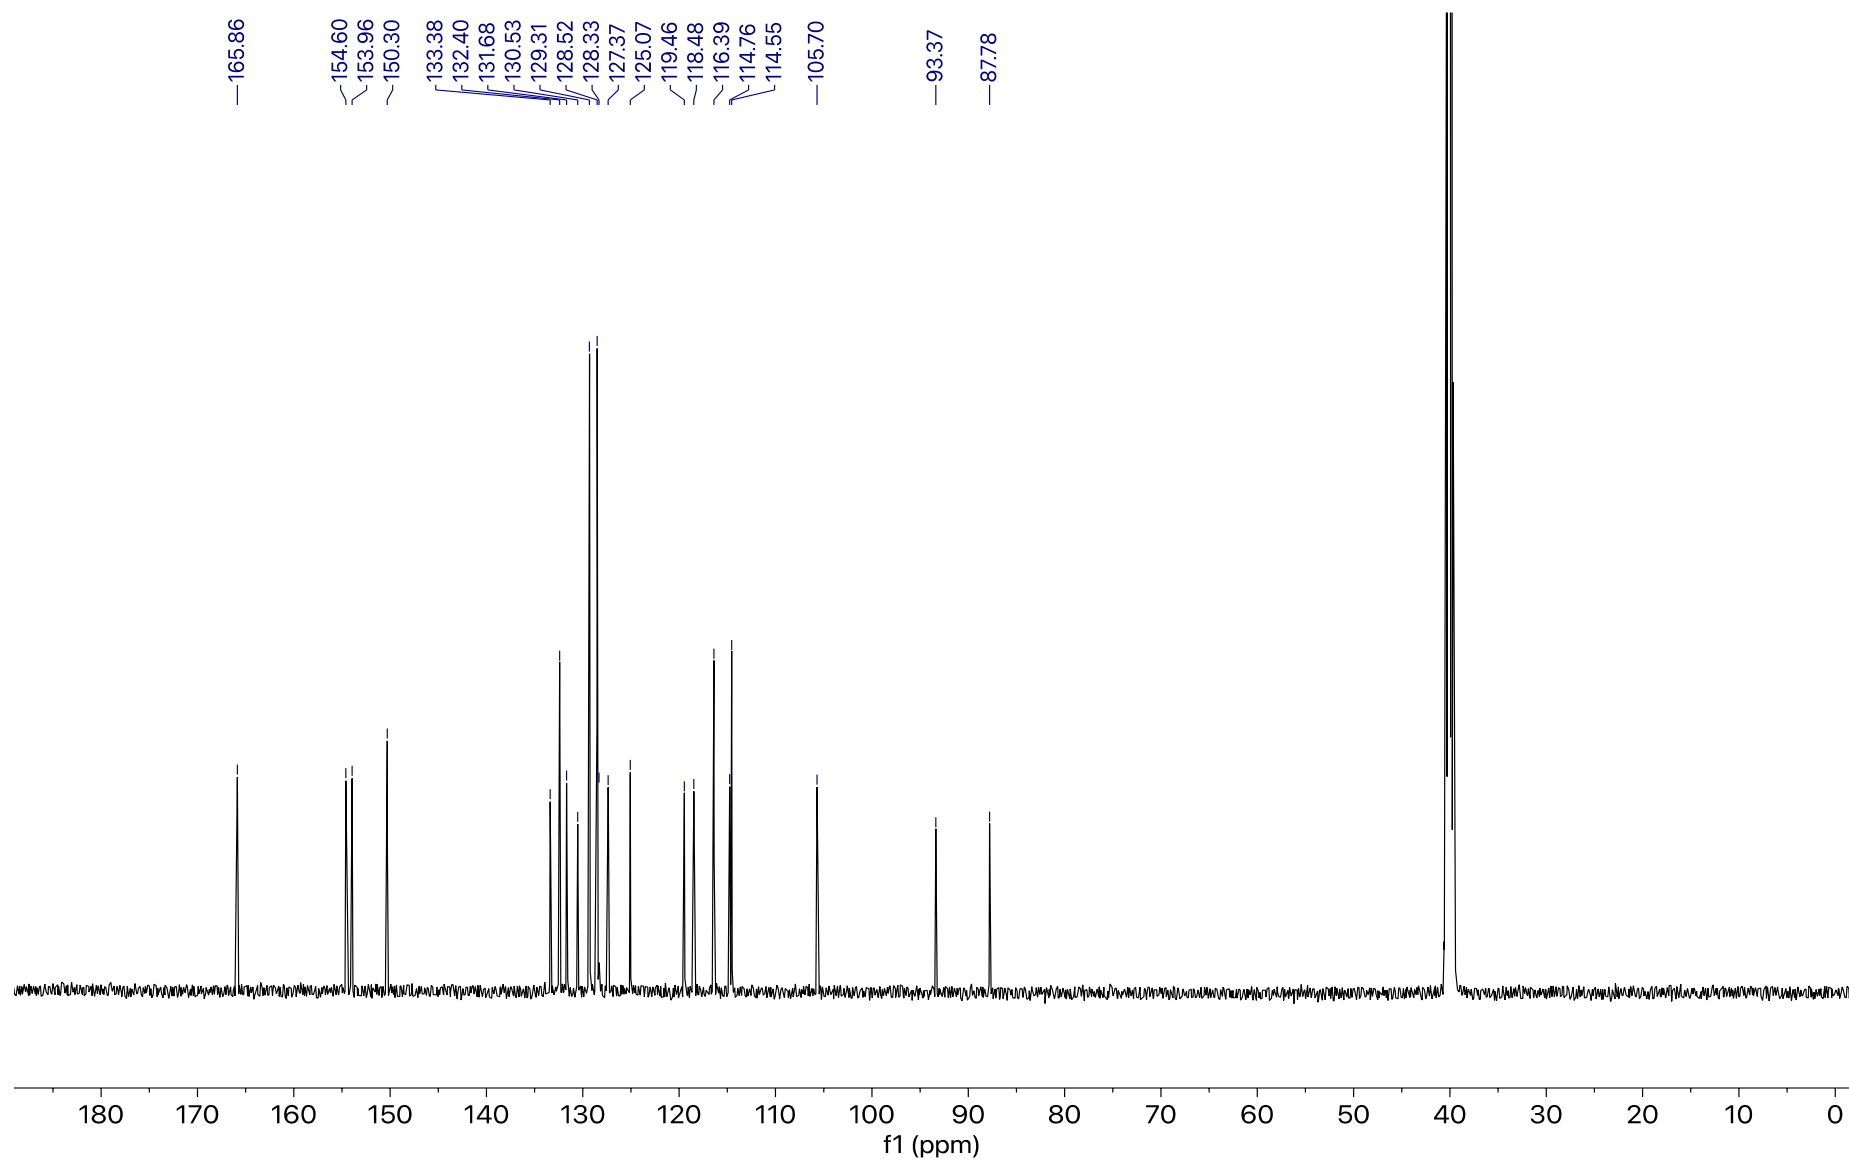

*N*-(6-((3-aminophenyl)ethynyl)-2,3-dioxo-3,4-dihydroquinoxalin-1(2*H*)-yl)benzamide (**22**)

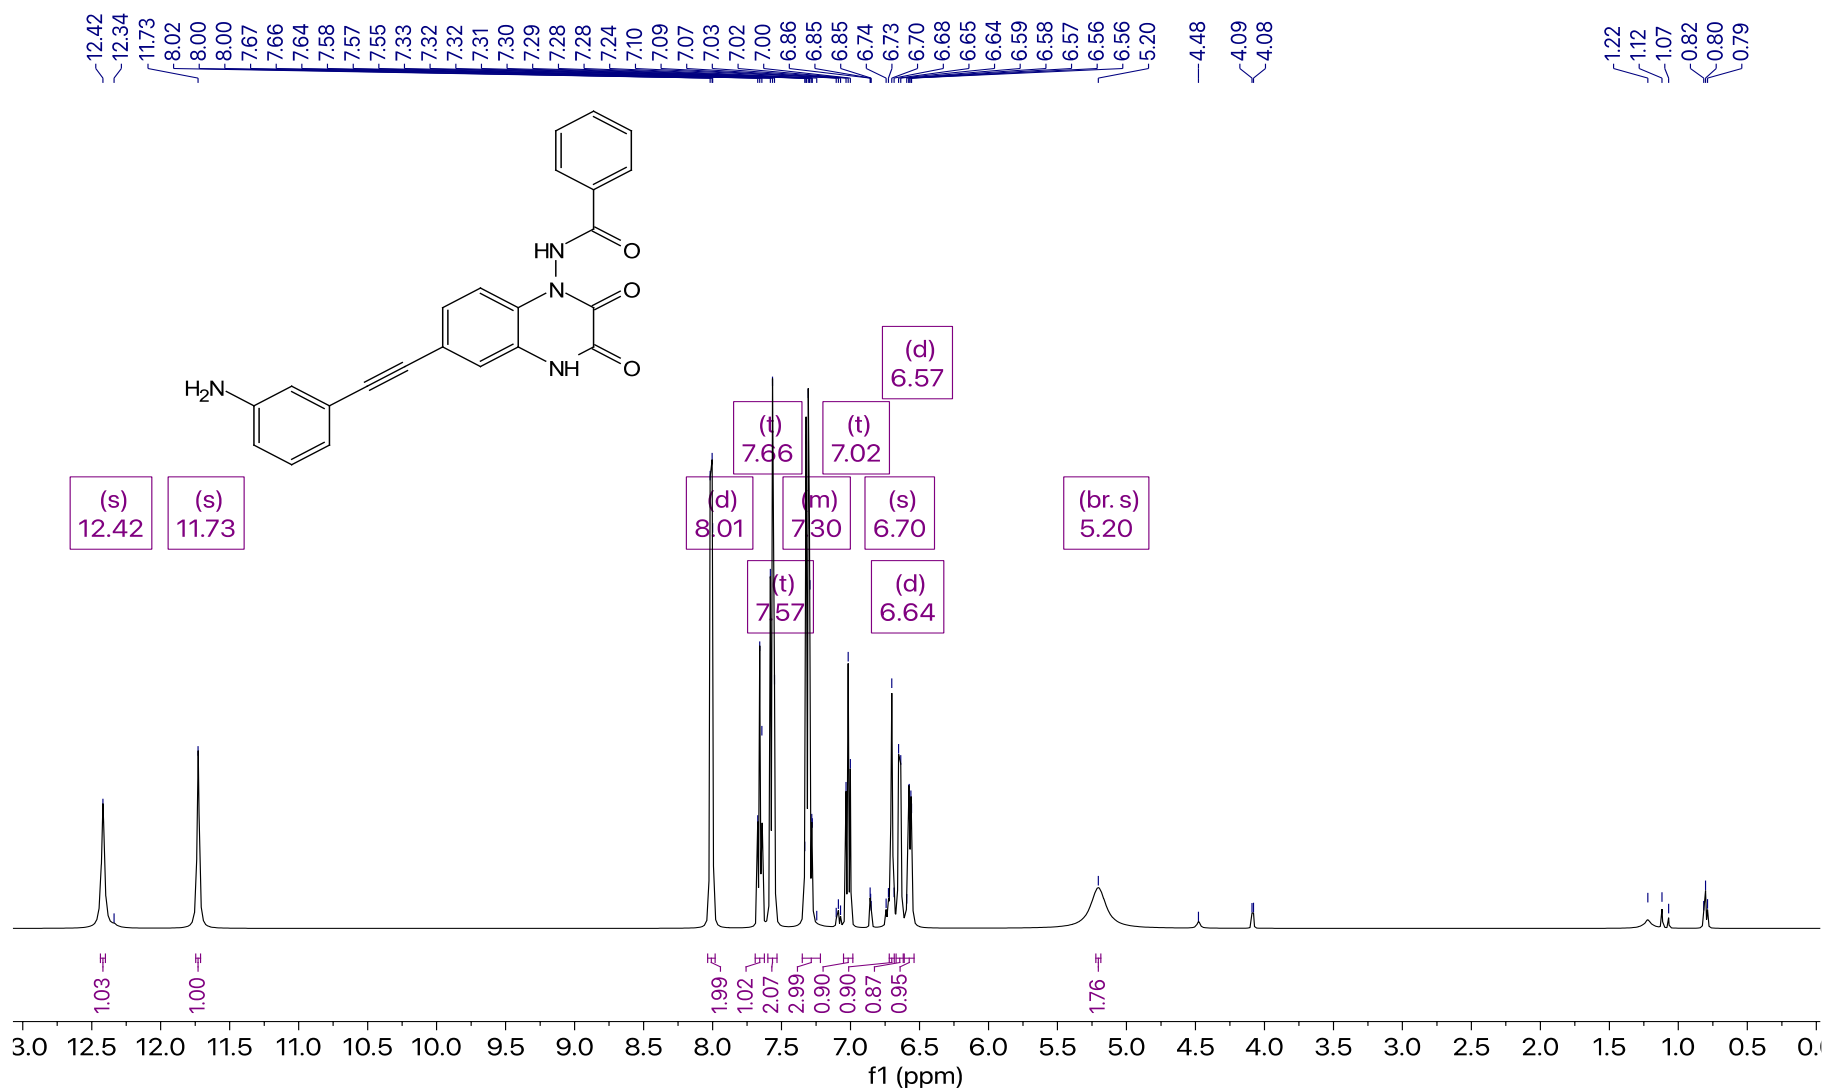



*N*-(6-((3-aminophenyl)ethynyl)-2,3-dioxo-3,4-dihydroquinoxalin-1(2*H*)-yl)benzamide (**22**)

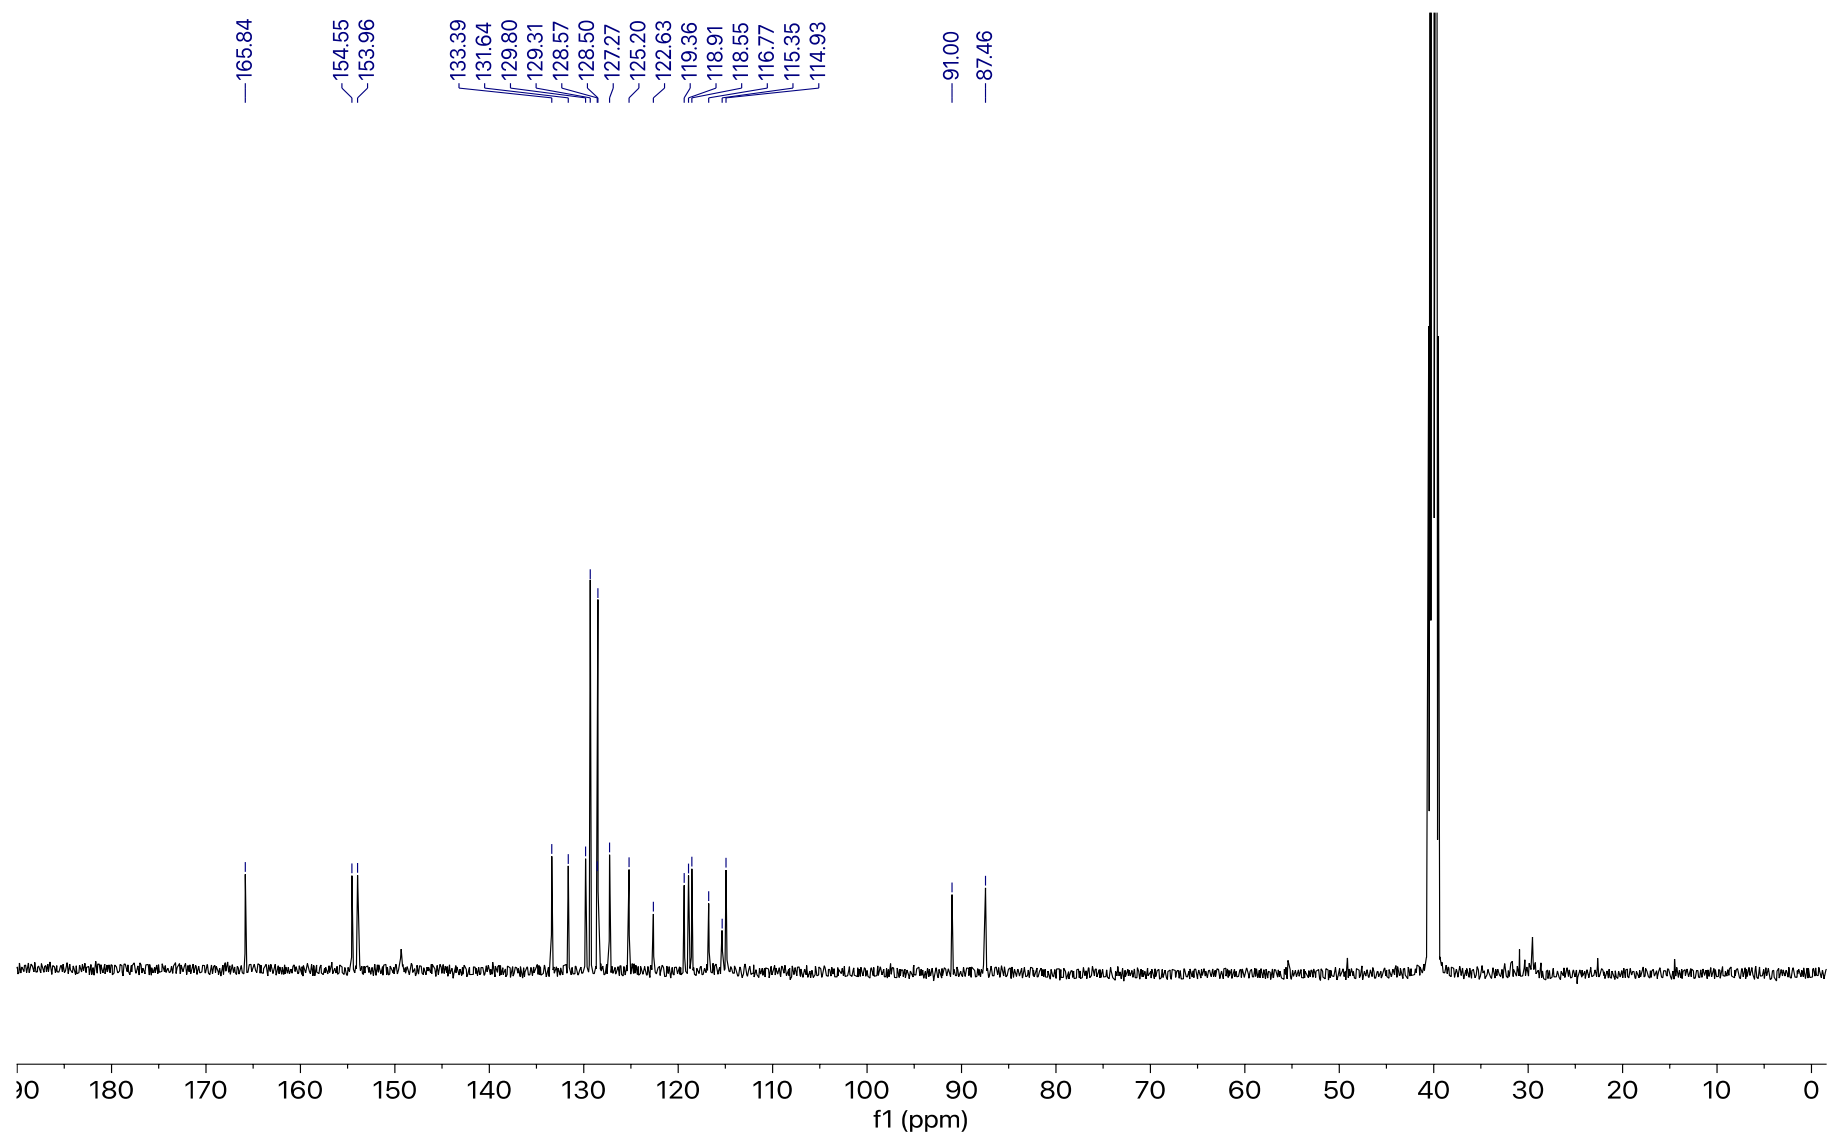

*N*-(6-((4-aminophenyl)ethynyl)-2,3-dioxo-3,4-dihydroquinoxalin-1(2*H*)-yl)benzamide (**23**)

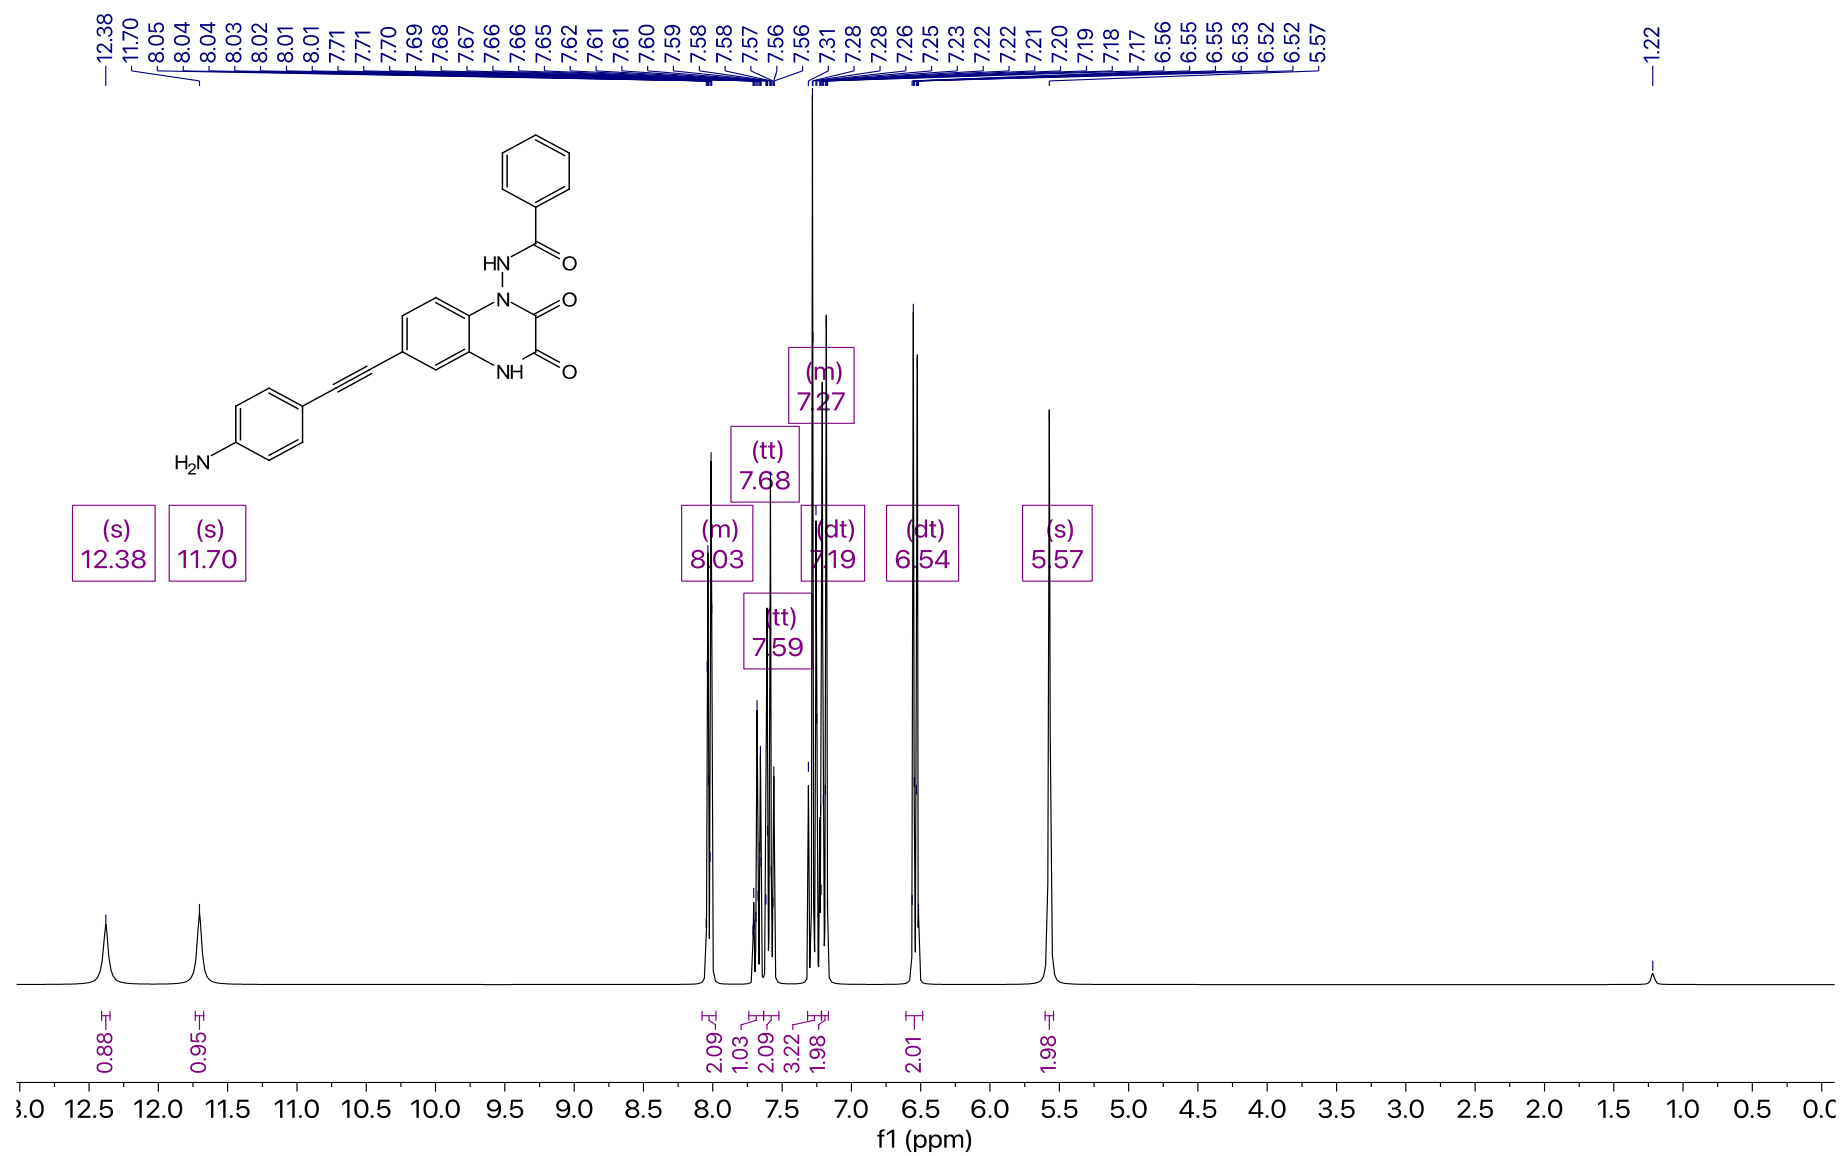

*N*-(6-((4-aminophenyl)ethynyl)-2,3-dioxo-3,4-dihydroquinoxalin-1(2*H*)-yl)benzamide (**23**)

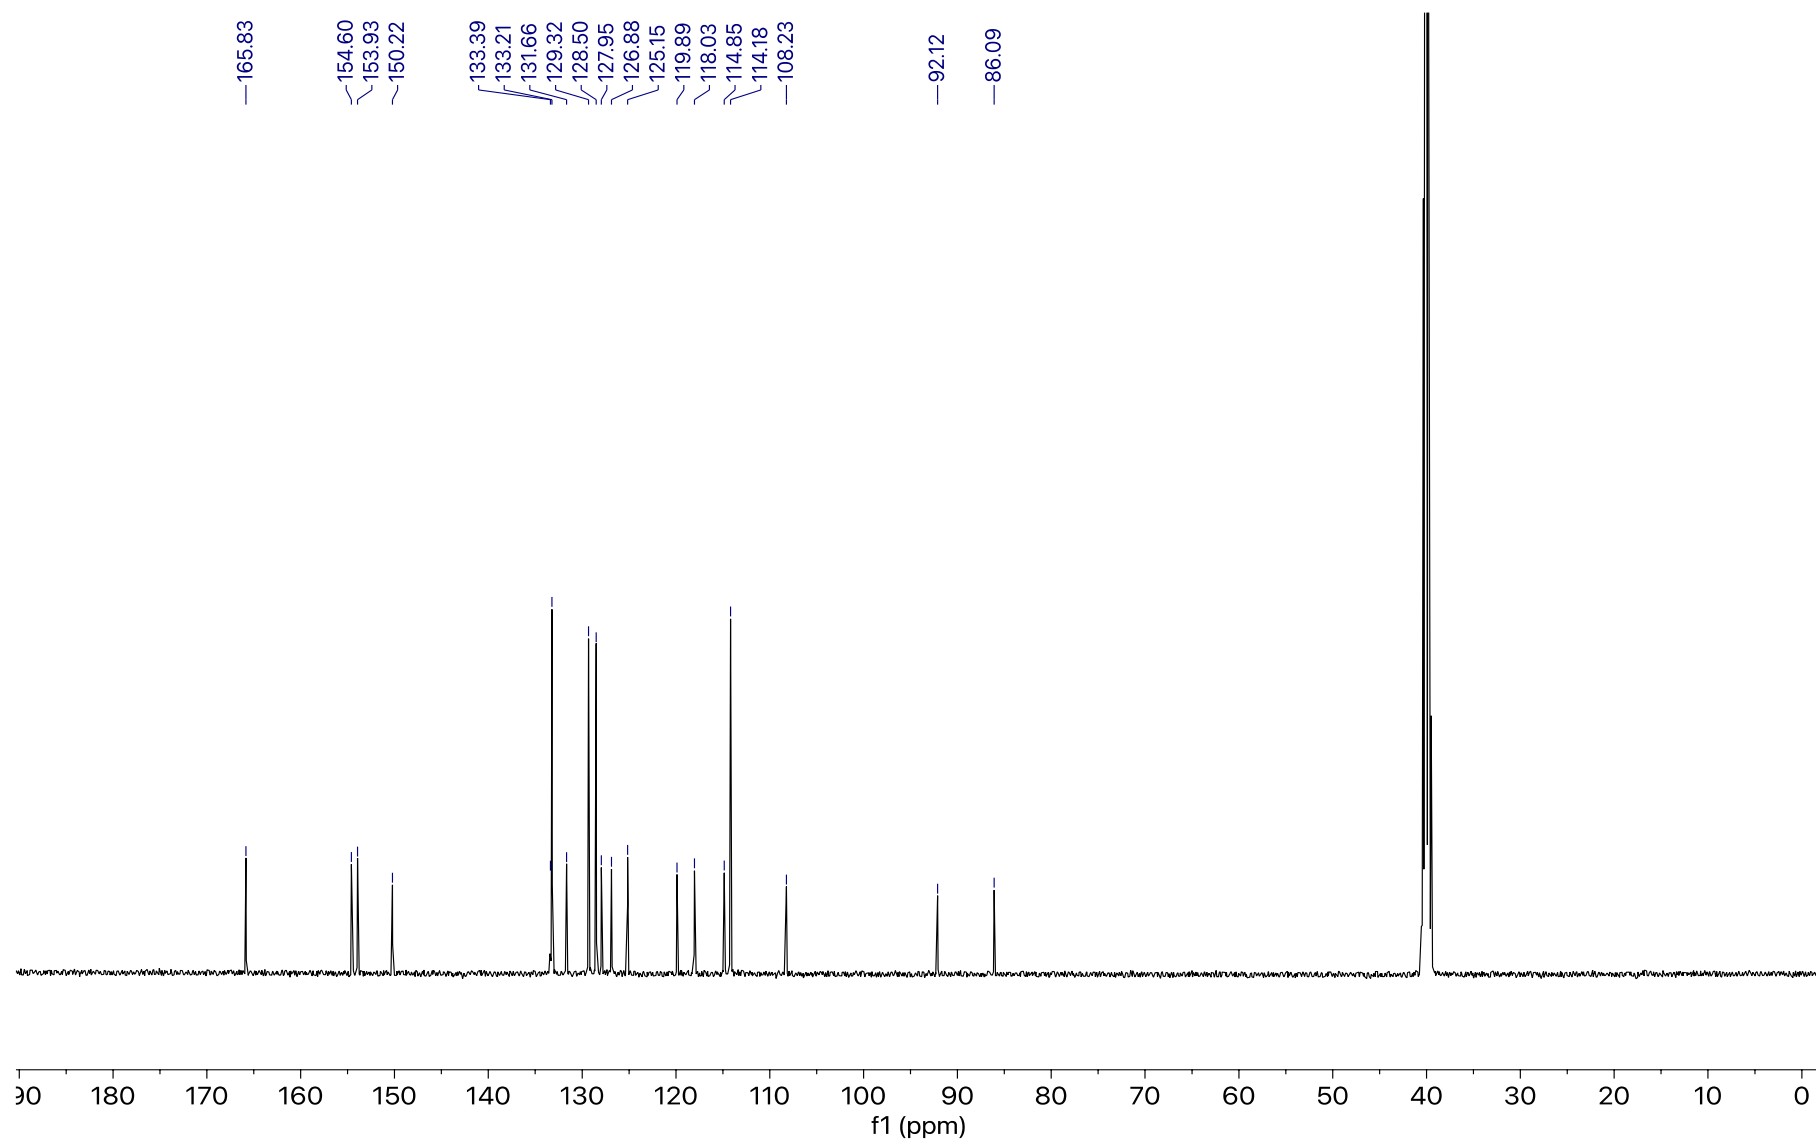

*N*-(6-((4-(dimethylamino)phenyl)ethynyl)-2,3-dioxo-3,4-dihydroquinoxalin-1(2*H*)-yl)benzamide (**24**)

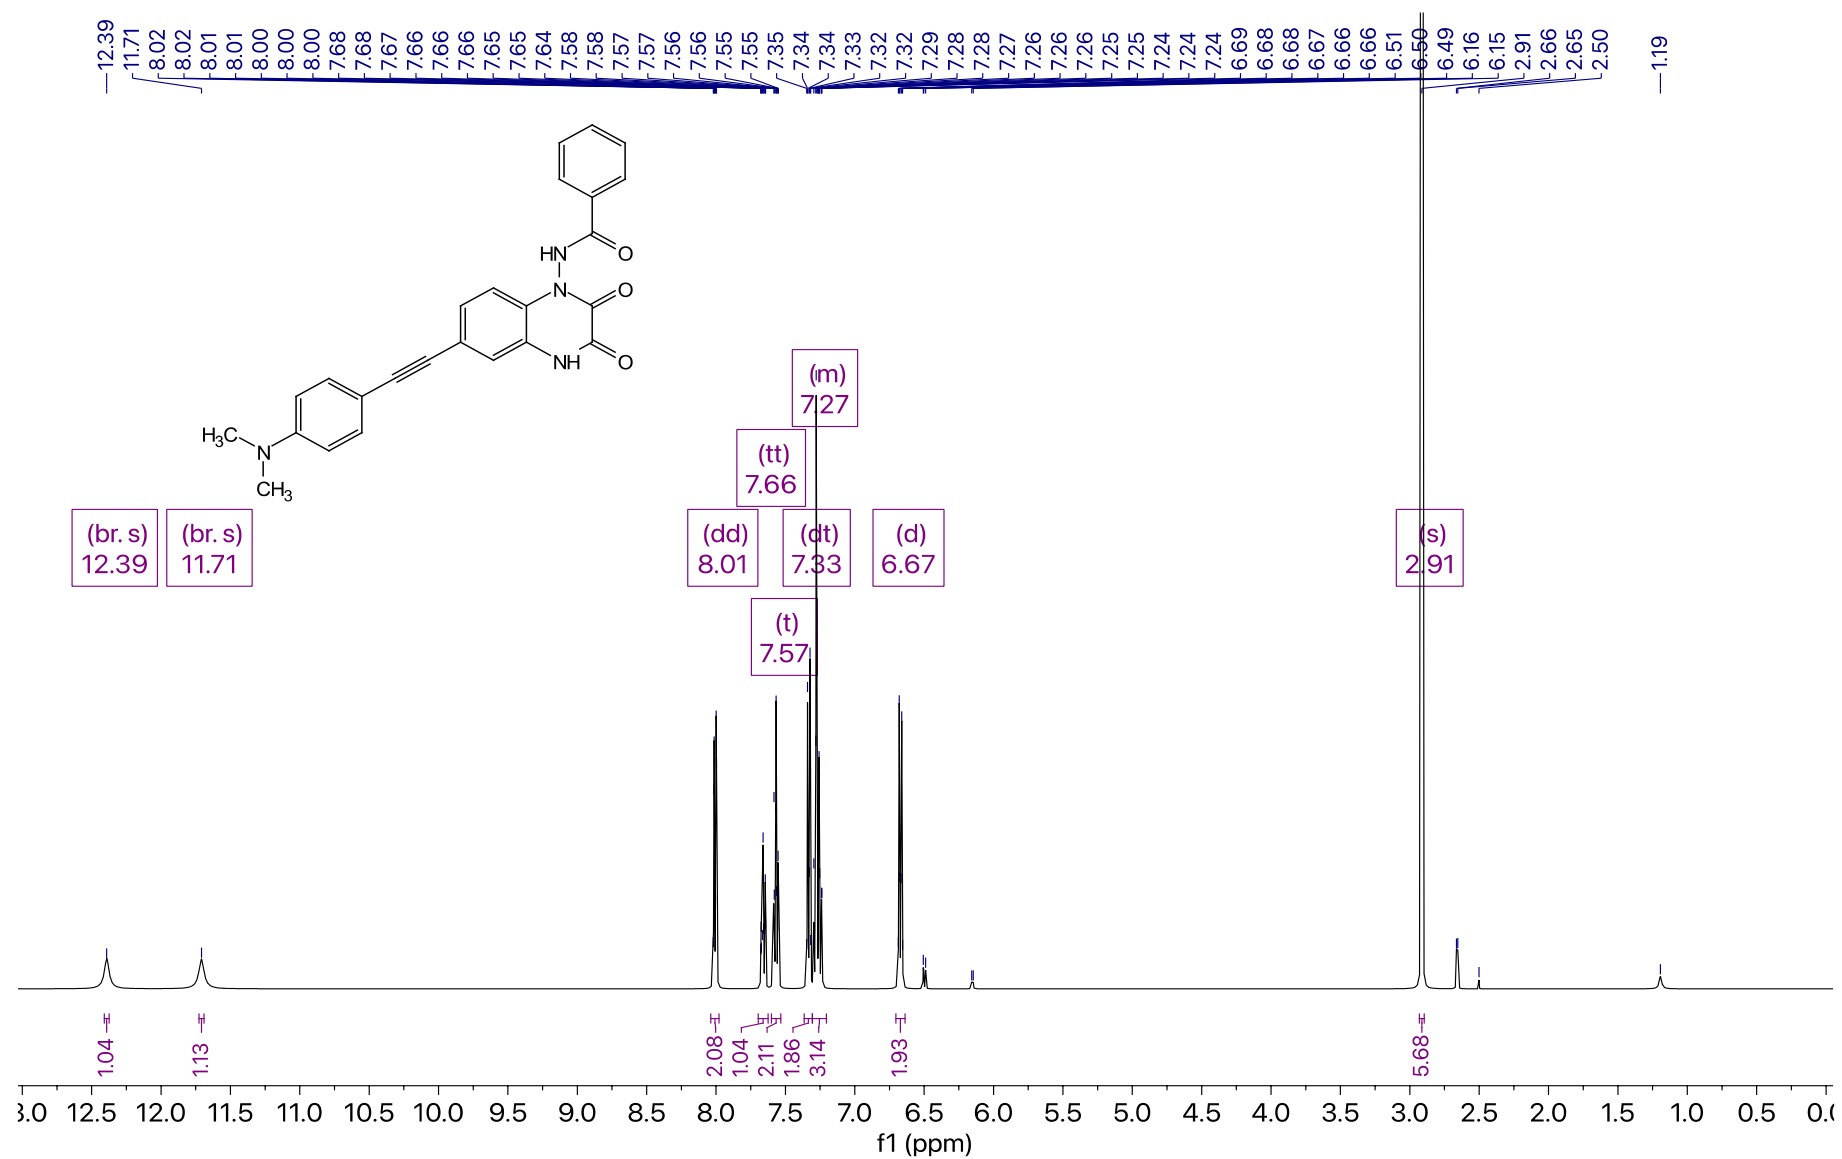

*N*-(6-((4-(dimethylamino)phenyl)ethynyl)-2,3-dioxo-3,4-dihydroquinoxalin-1(2*H*)-yl)benzamide (**24**)

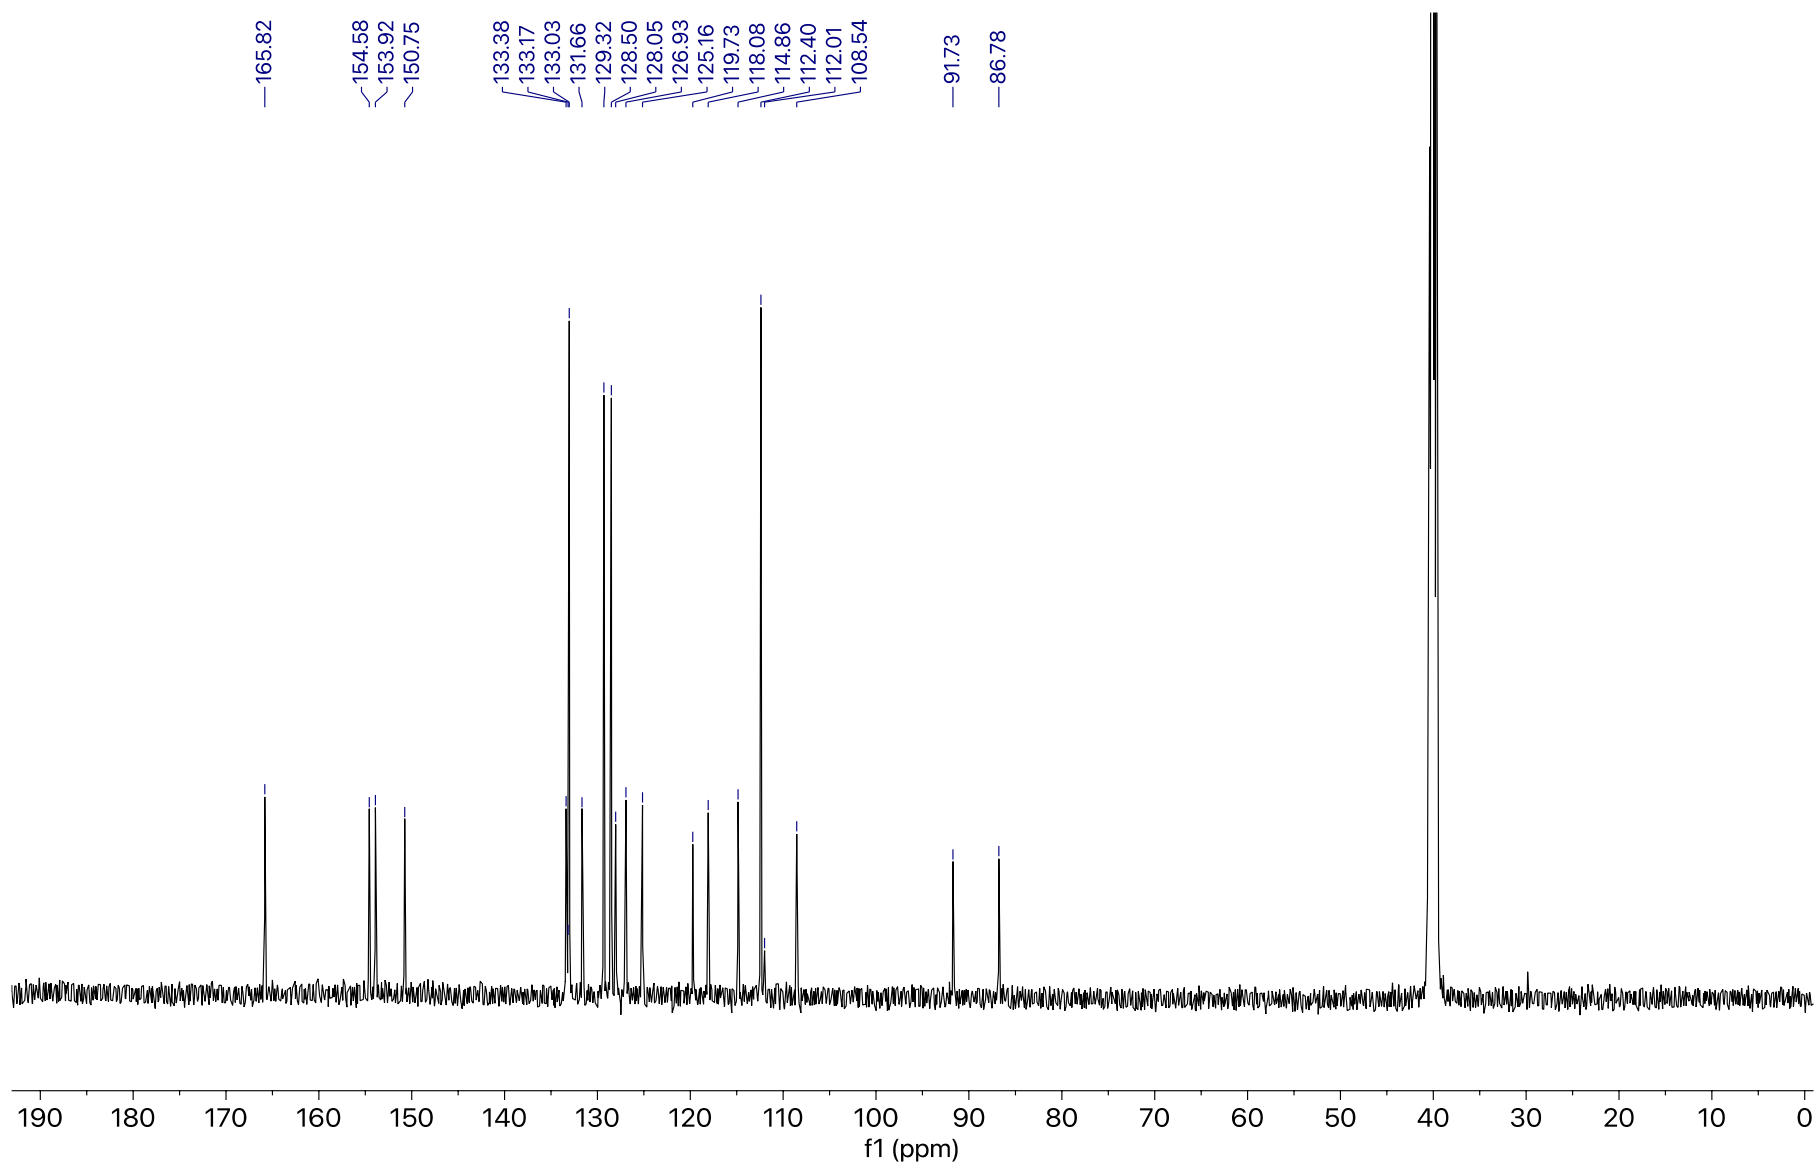

*N*-(2,3-dioxo-6-(pyridin-4-ylethynyl)-3,4-dihydroquinoxalin-1(2*H*)-yl)benzamide (**25**)

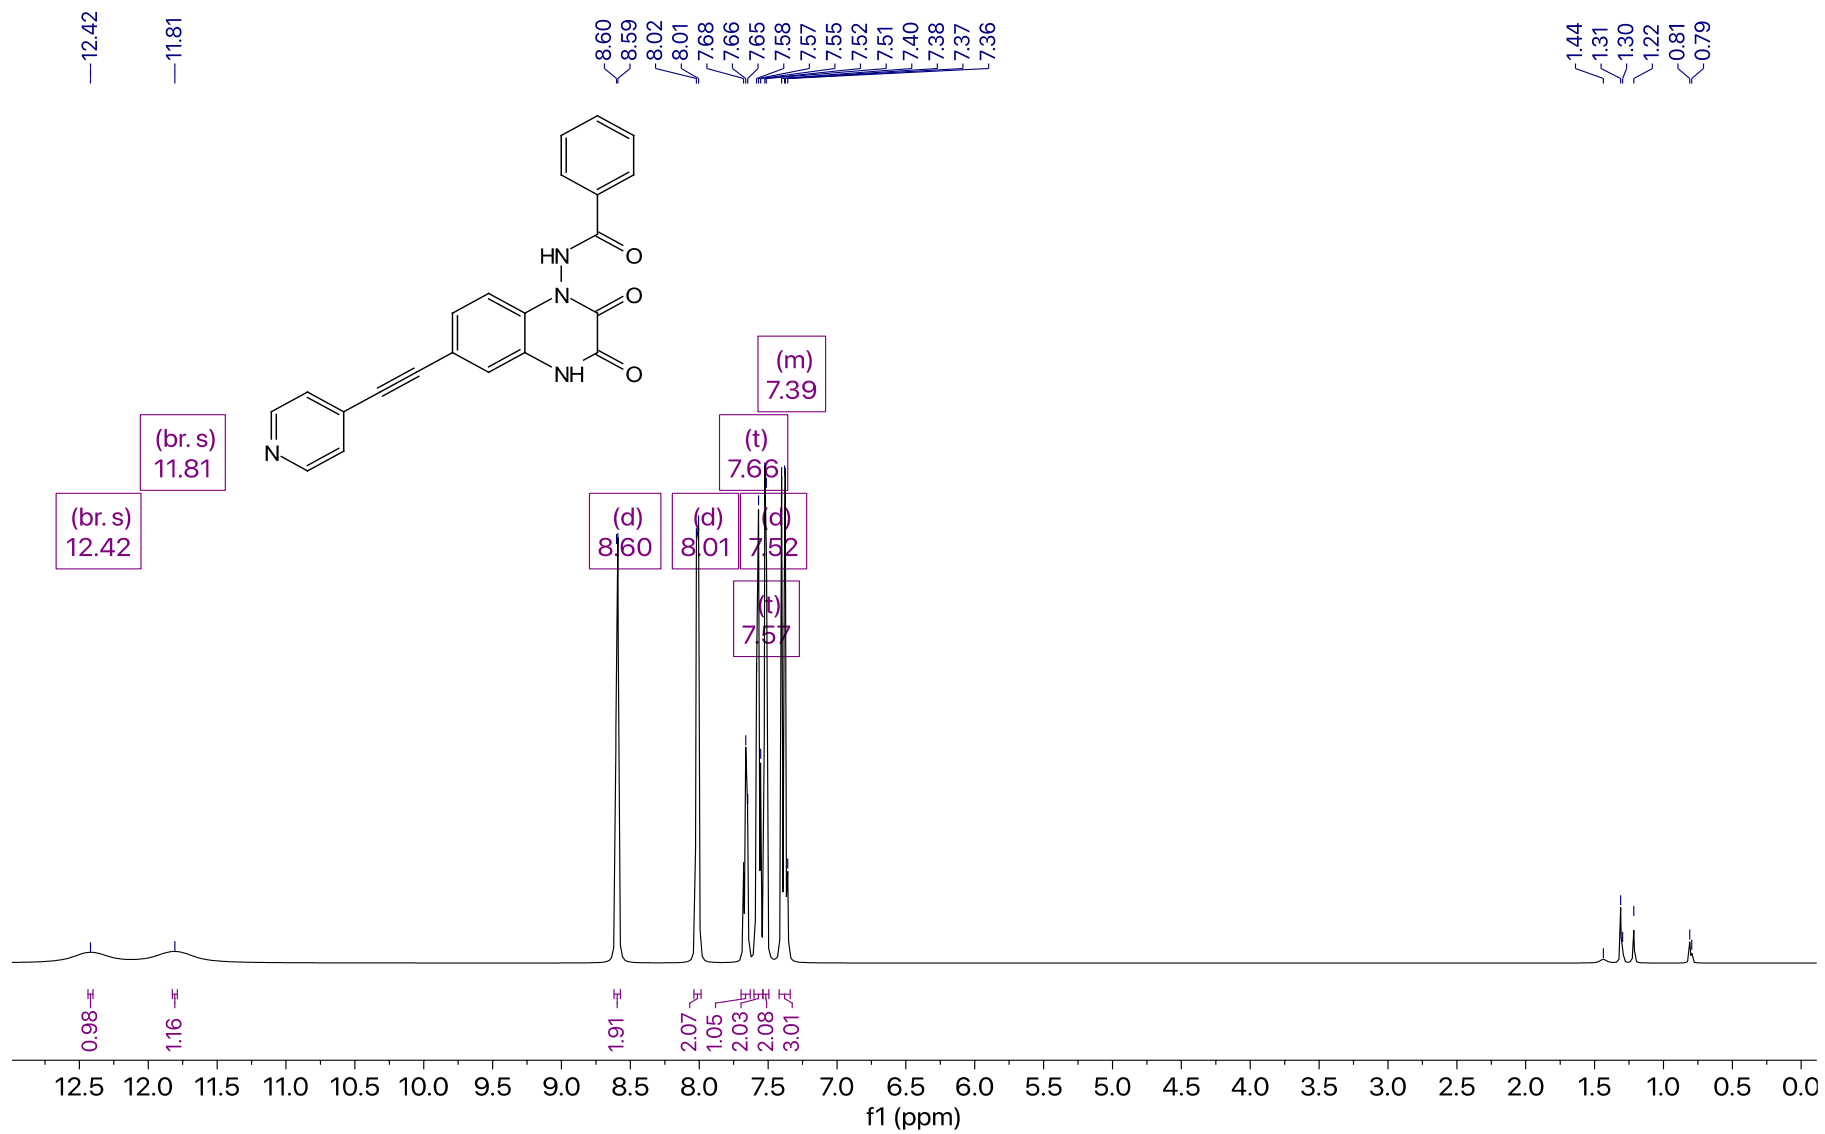

*N*-(2,3-dioxo-6-(pyridin-4-ylethynyl)-3,4-dihydroquinoxalin-1(2*H*)-yl)benzamide (**25**)

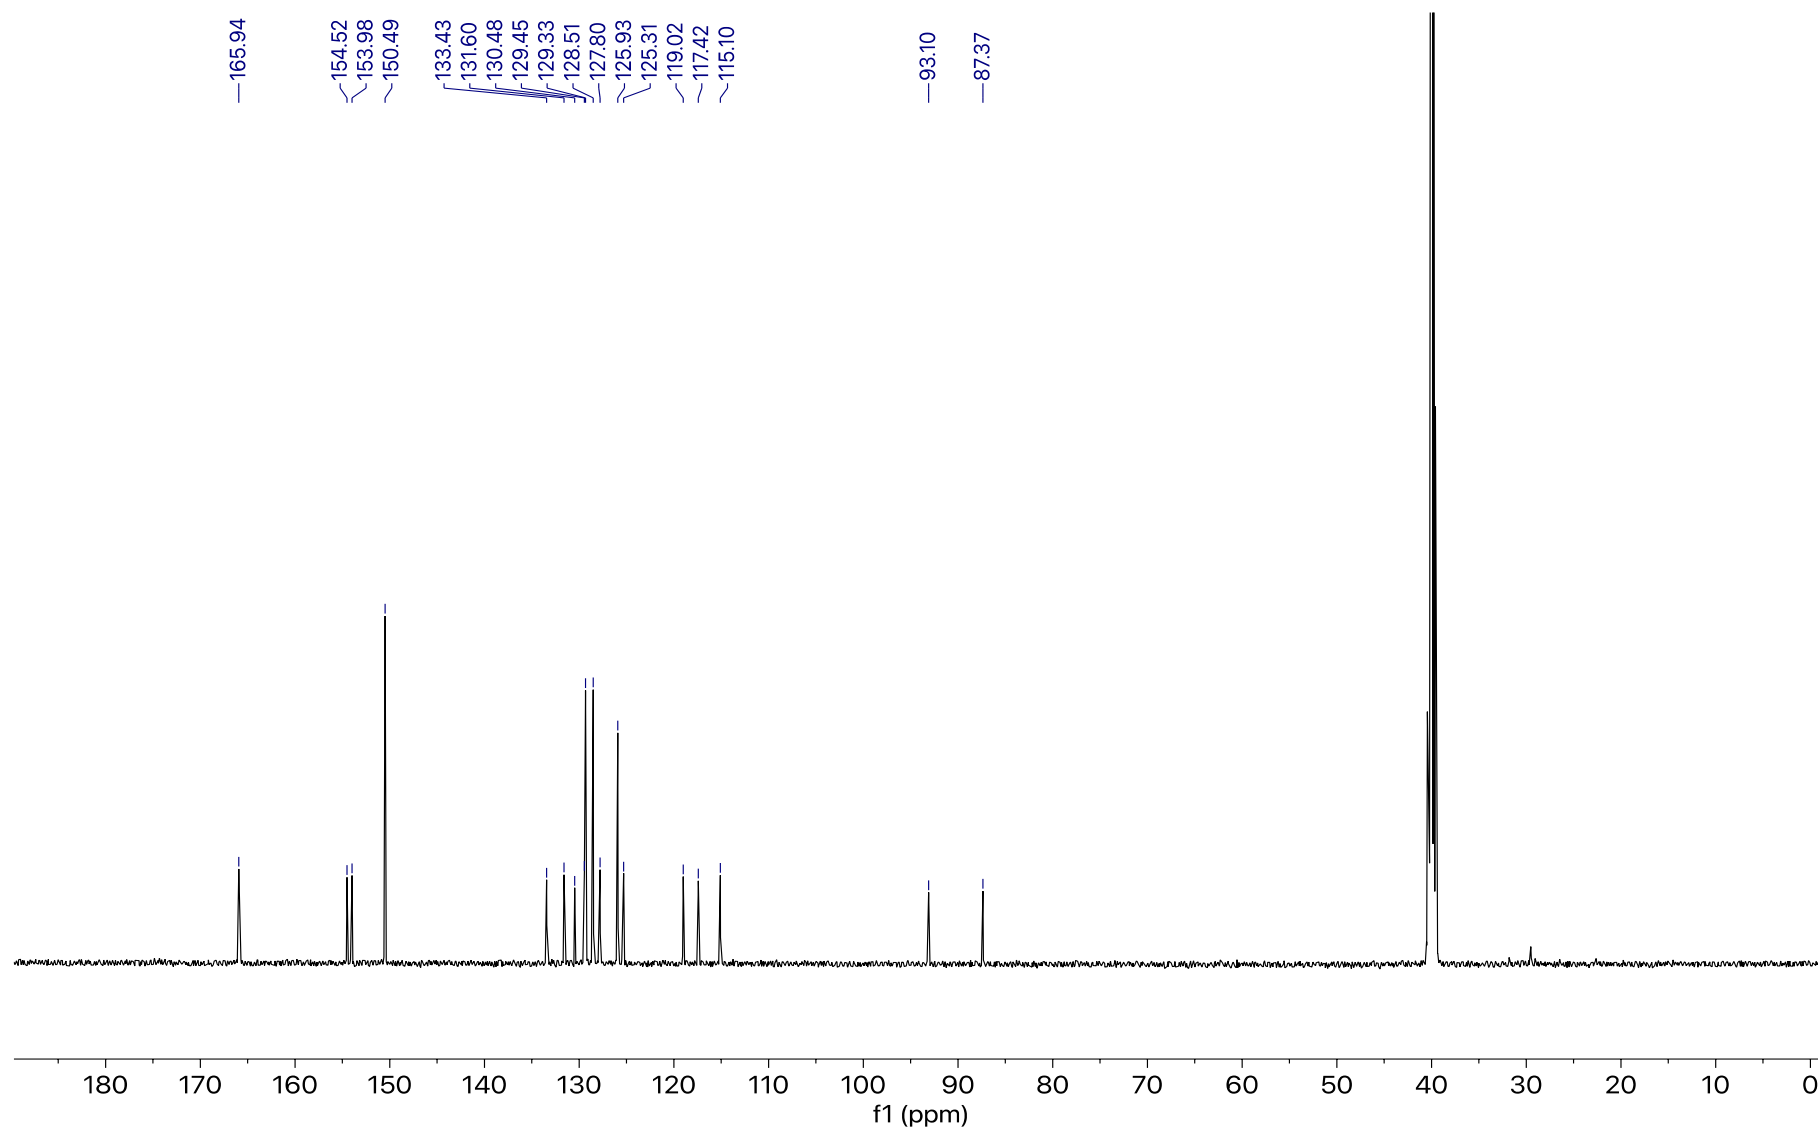

*N*-(6-((6-hydroxypyridin-3-yl)ethynyl)-2,3-dioxo-3,4-dihydroquinoxalin-1(2*H*)-yl)benzamide (**26**)

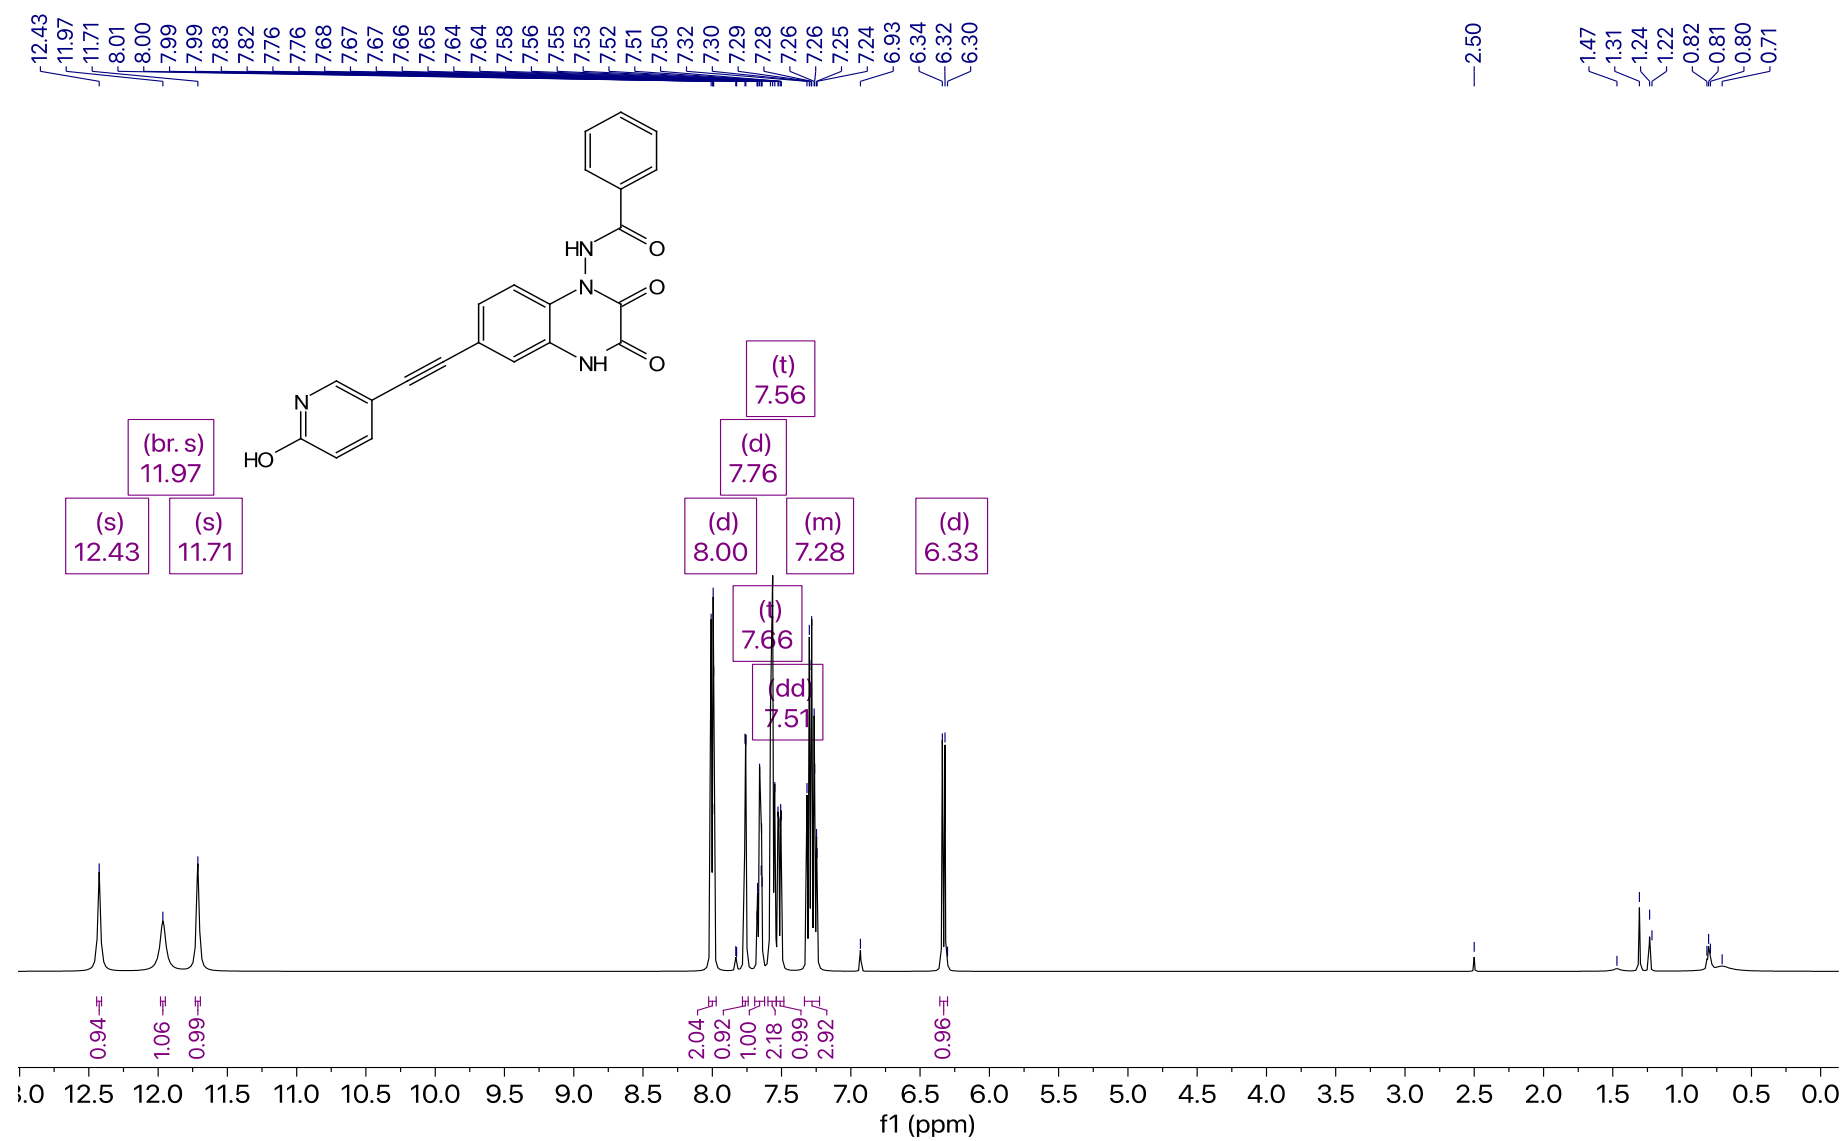



*N*-(6-((6-hydroxypyridin-3-yl)ethynyl)-2,3-dioxo-3,4-dihydroquinoxalin-1(2*H*)-yl)benzamide (**26**)

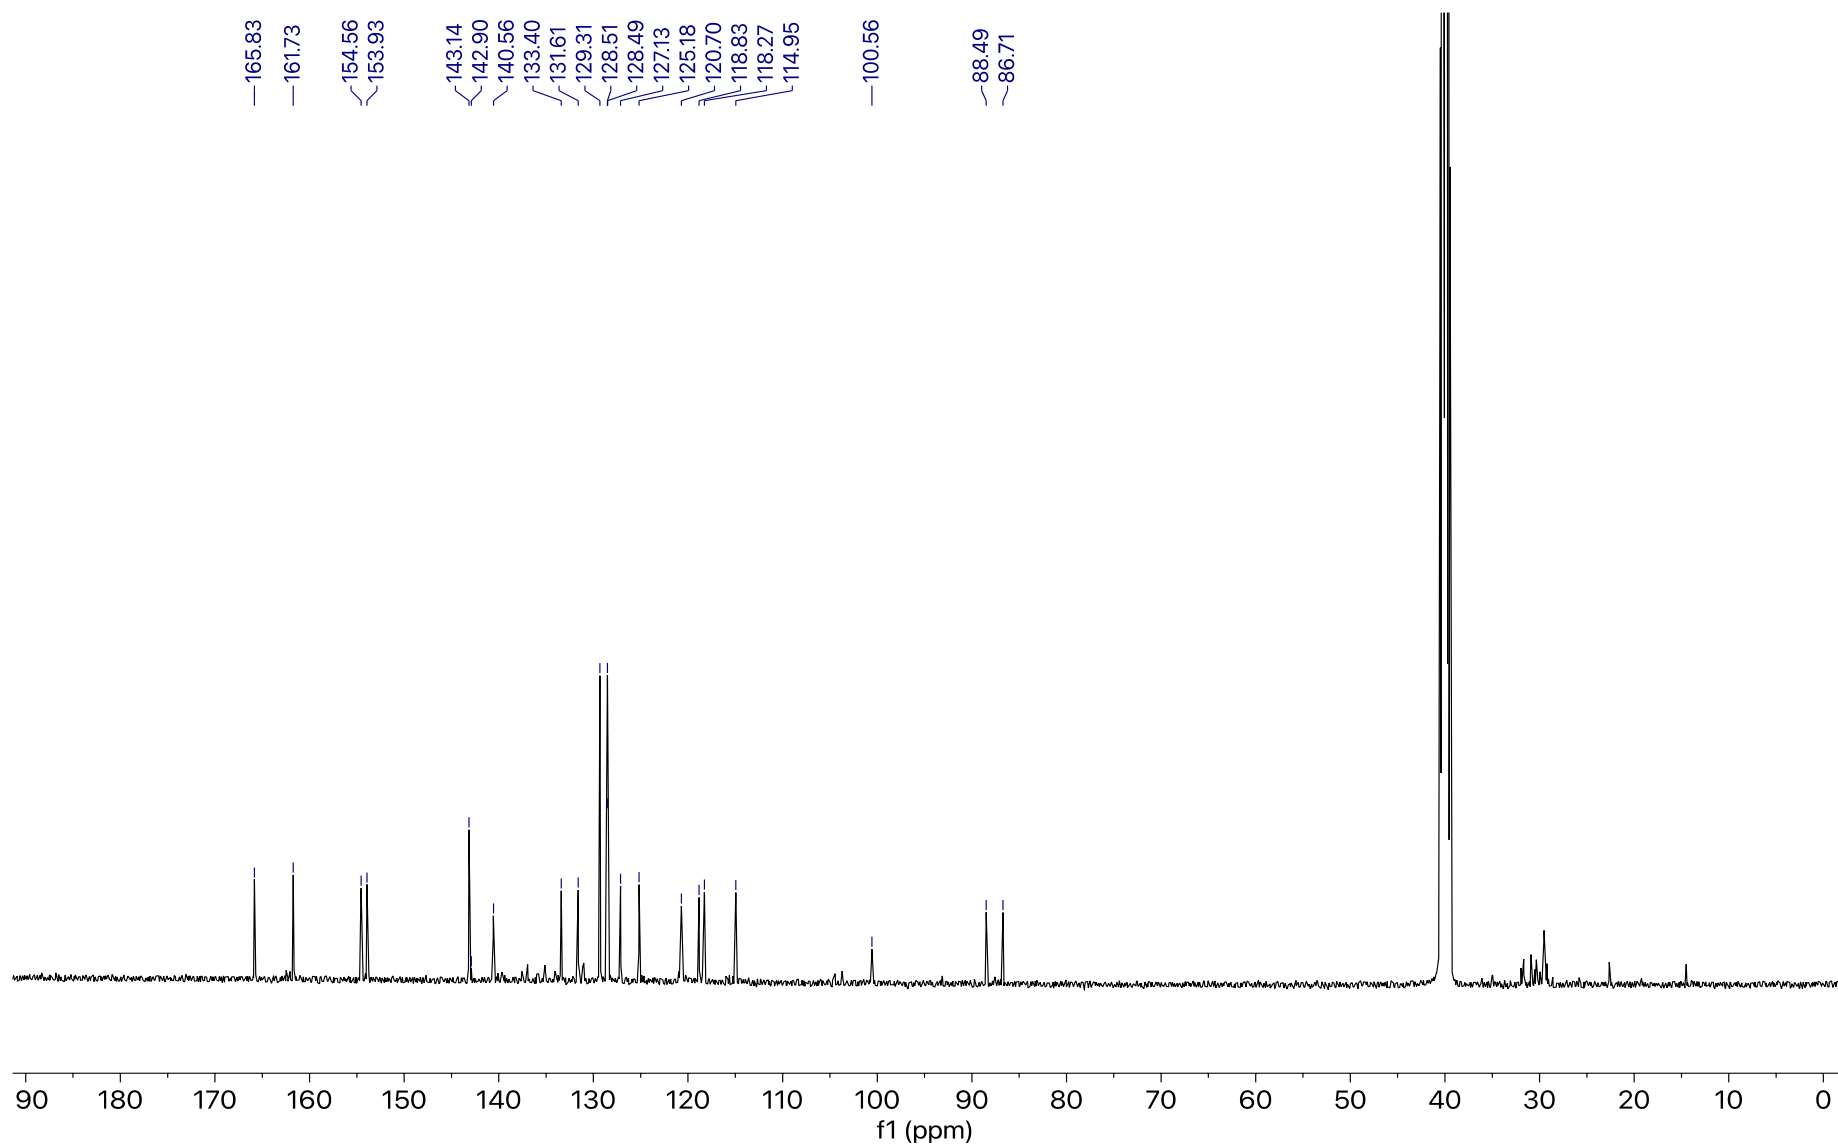

*N*-(2,3-dioxo-6-(pyrimidin-5-ylethynyl)-3,4-dihydroquinoxalin-1(2*H*)-yl)benzamide (**27**)

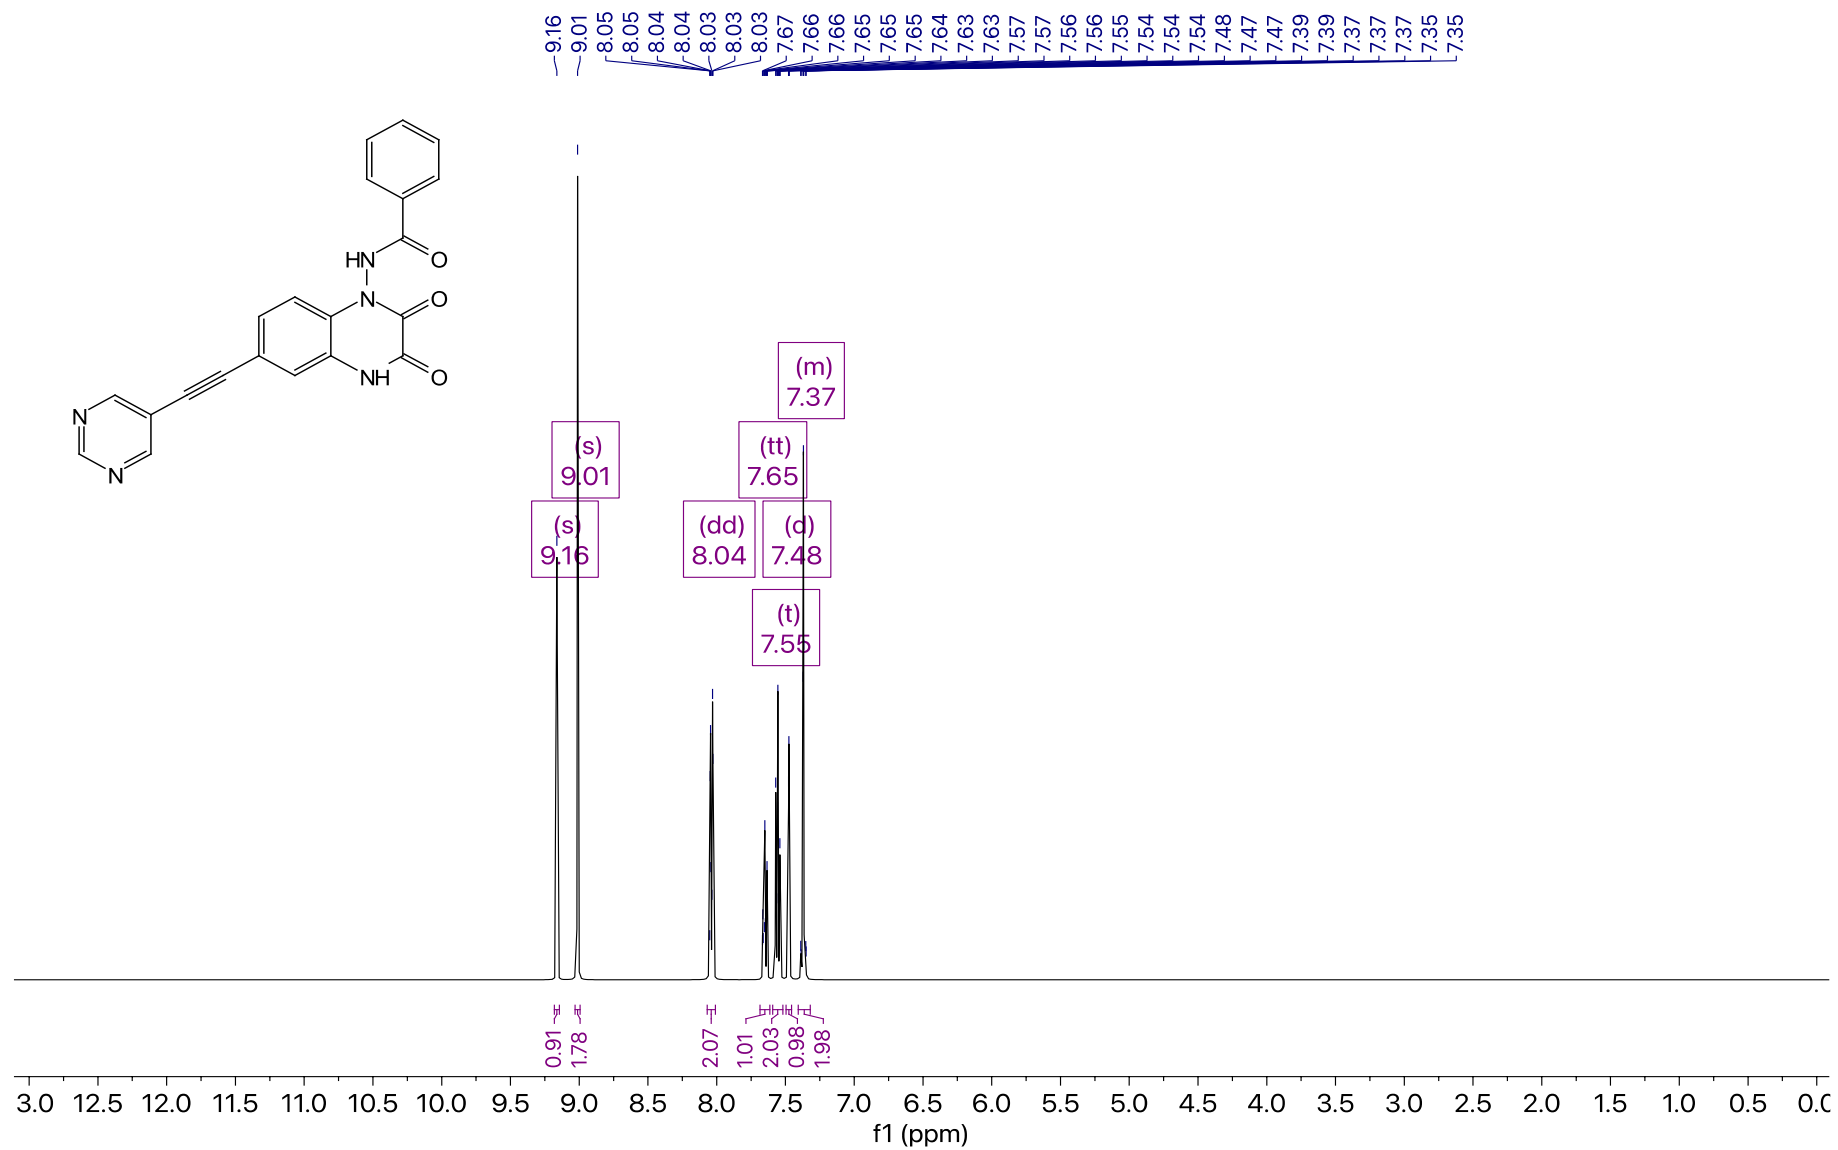

*N*-(2,3-dioxo-6-(pyrimidin-5-ylethynyl)-3,4-dihydroquinoxalin-1(2*H*)-yl)benzamide (**27**)

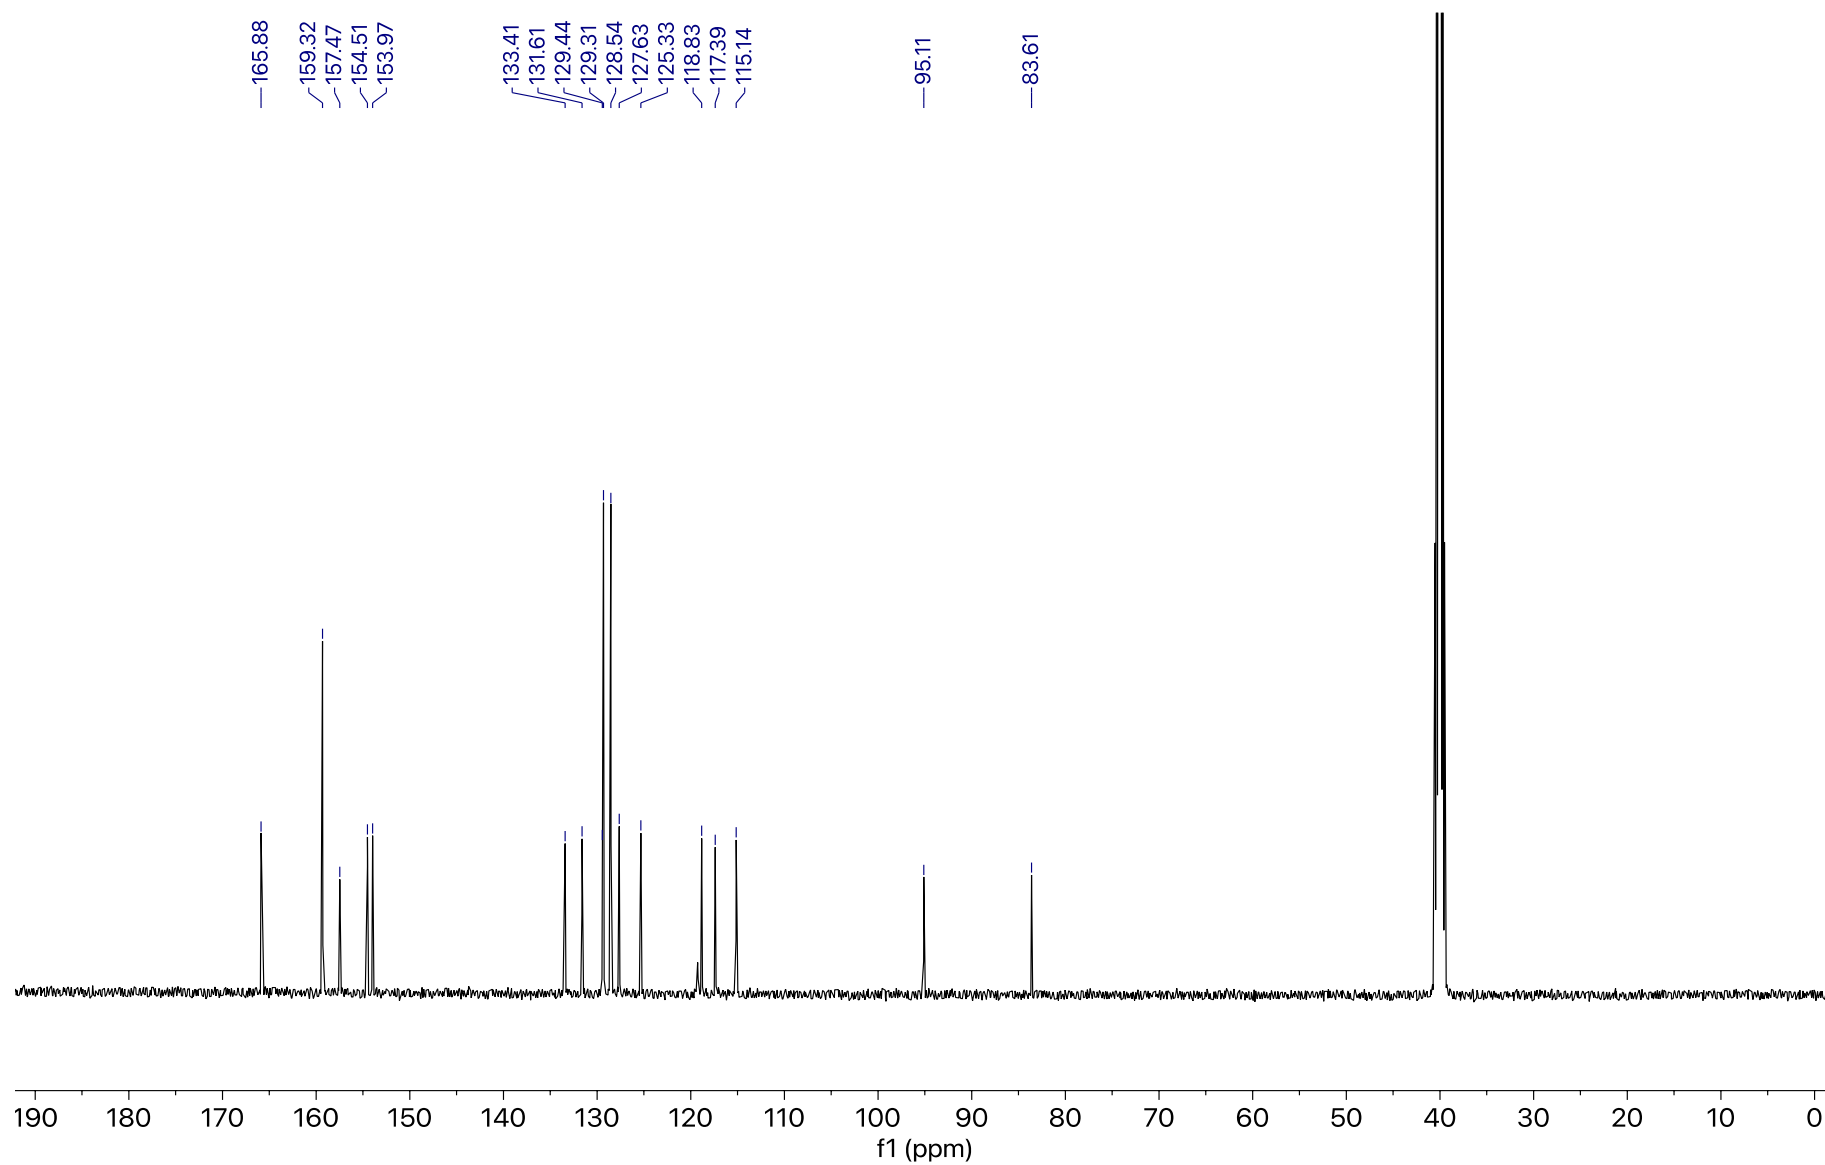

*N*-(6-(imidazo[1,2-*b*]pyridazin-3-ylethynyl)-2,3-dioxo-3,4-dihydroquinoxalin-1(2*H*)-yl)benzamide (**28**)

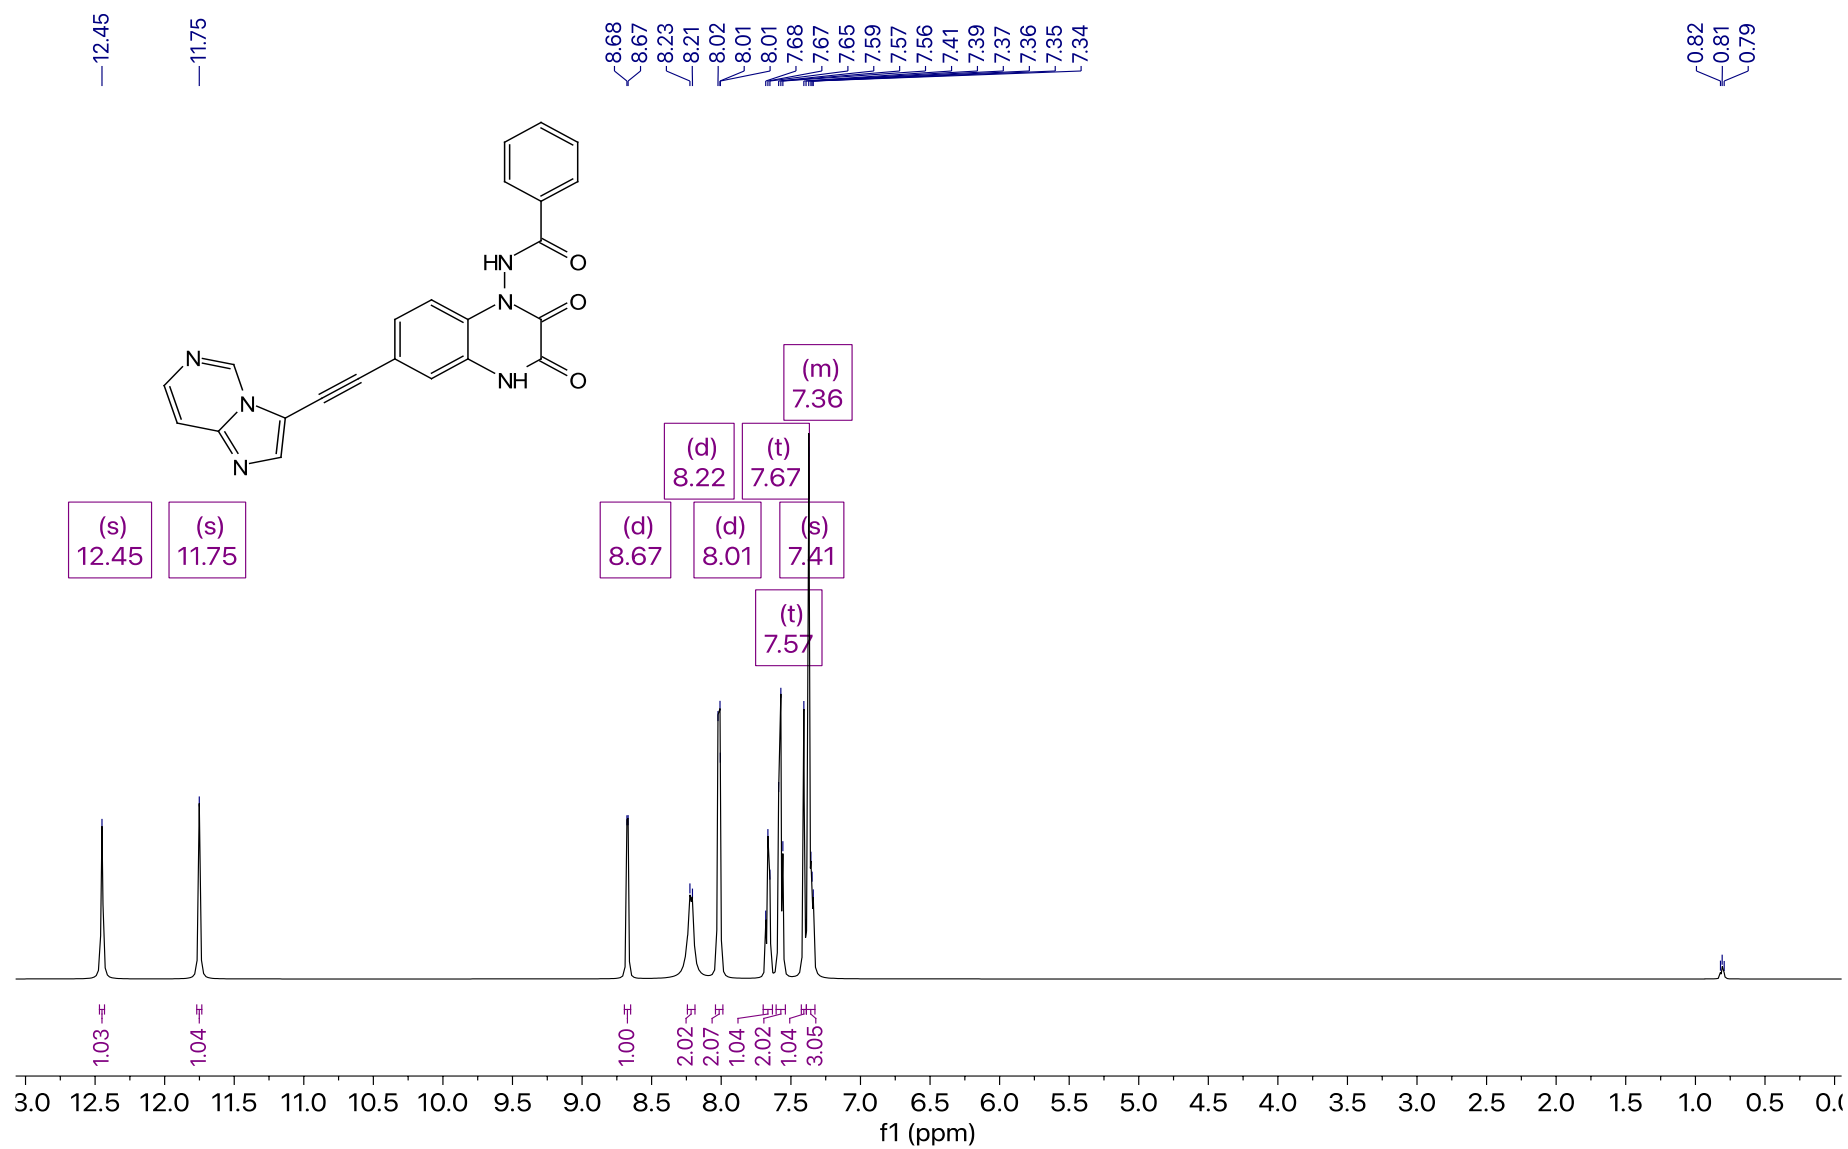

*N*-(6-(imidazo[1,2-*b*]pyridazin-3-ylethynyl)-2,3-dioxo-3,4-dihydroquinoxalin-1(2*H*)-yl)benzamide (**28**)

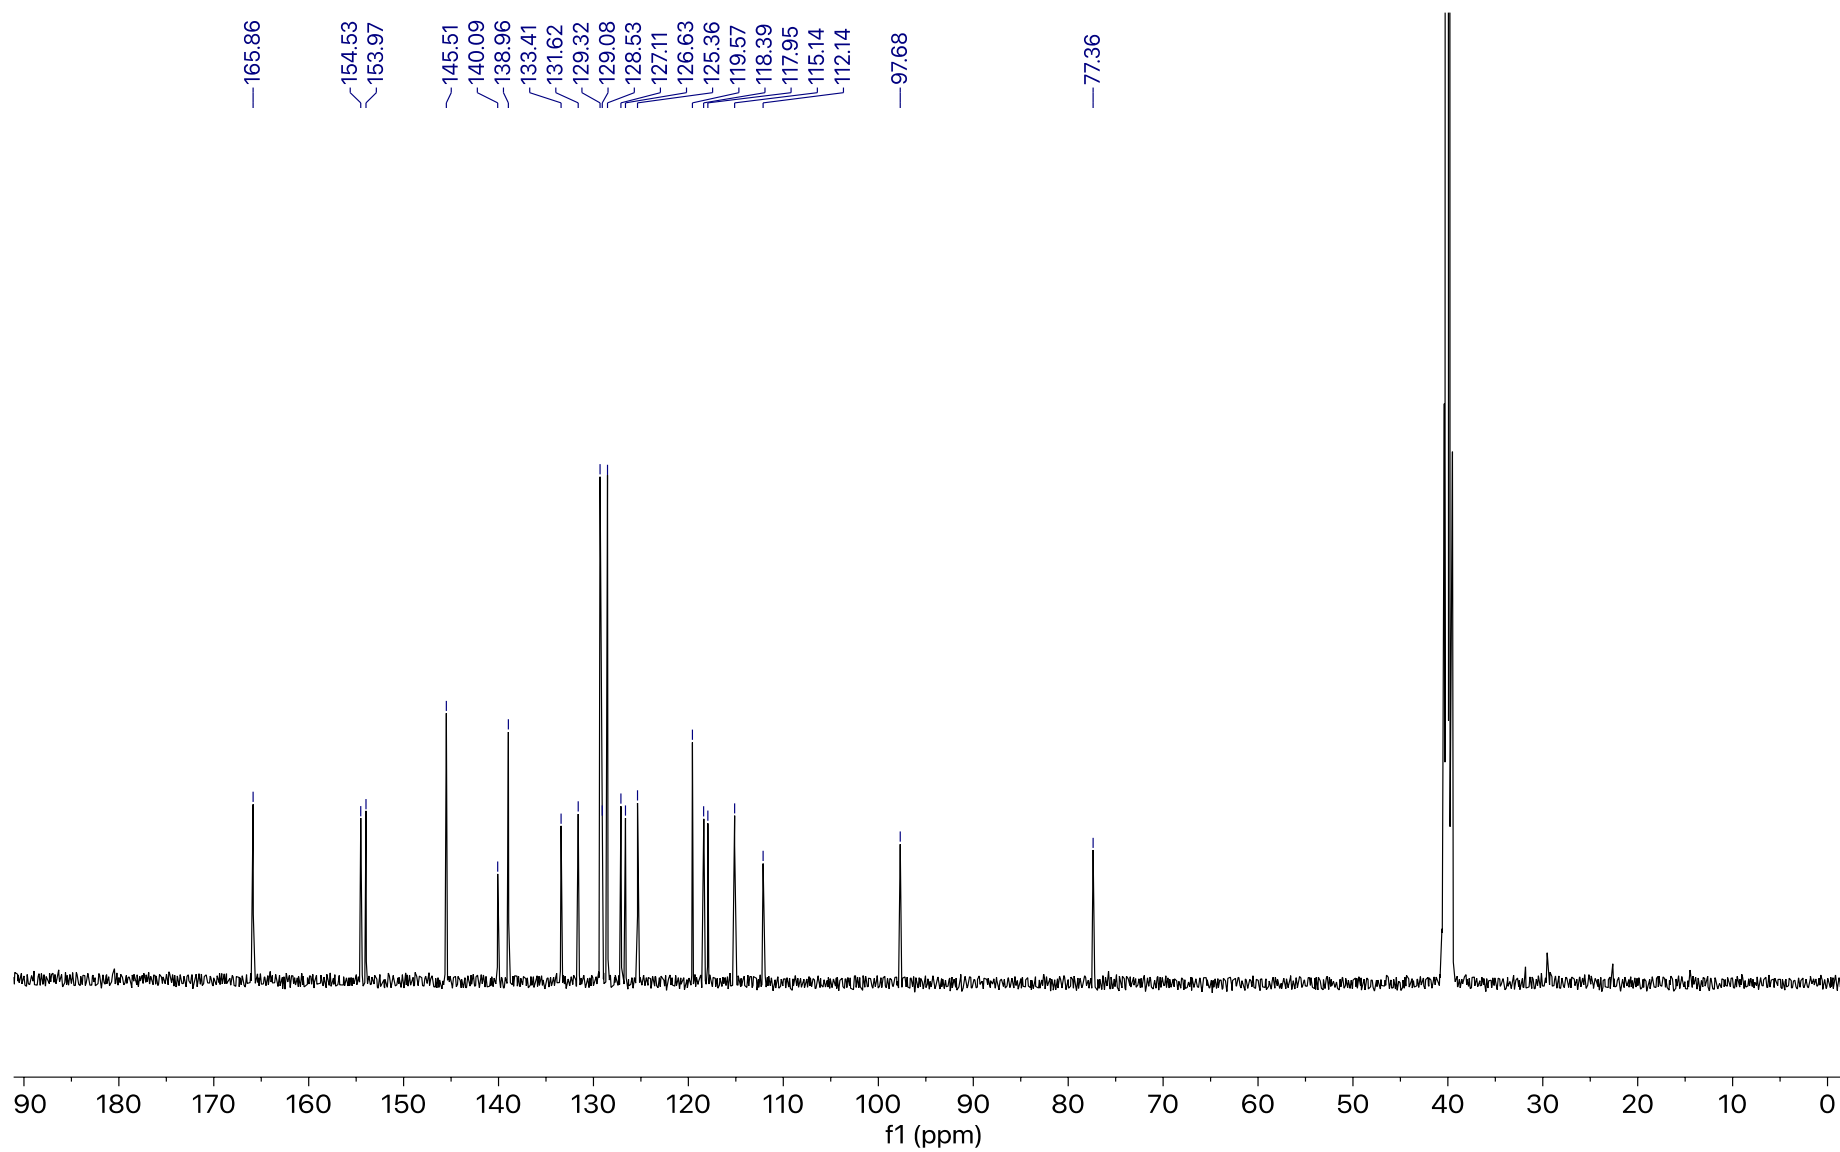

*N*-(6-((1*H*-pyrazolo[4,3-*b*]pyridin-5-yl)ethynyl)-2,3-dioxo-3,4-dihydroquinoxalin-1(2*H*)-yl)benzamide (**29**)

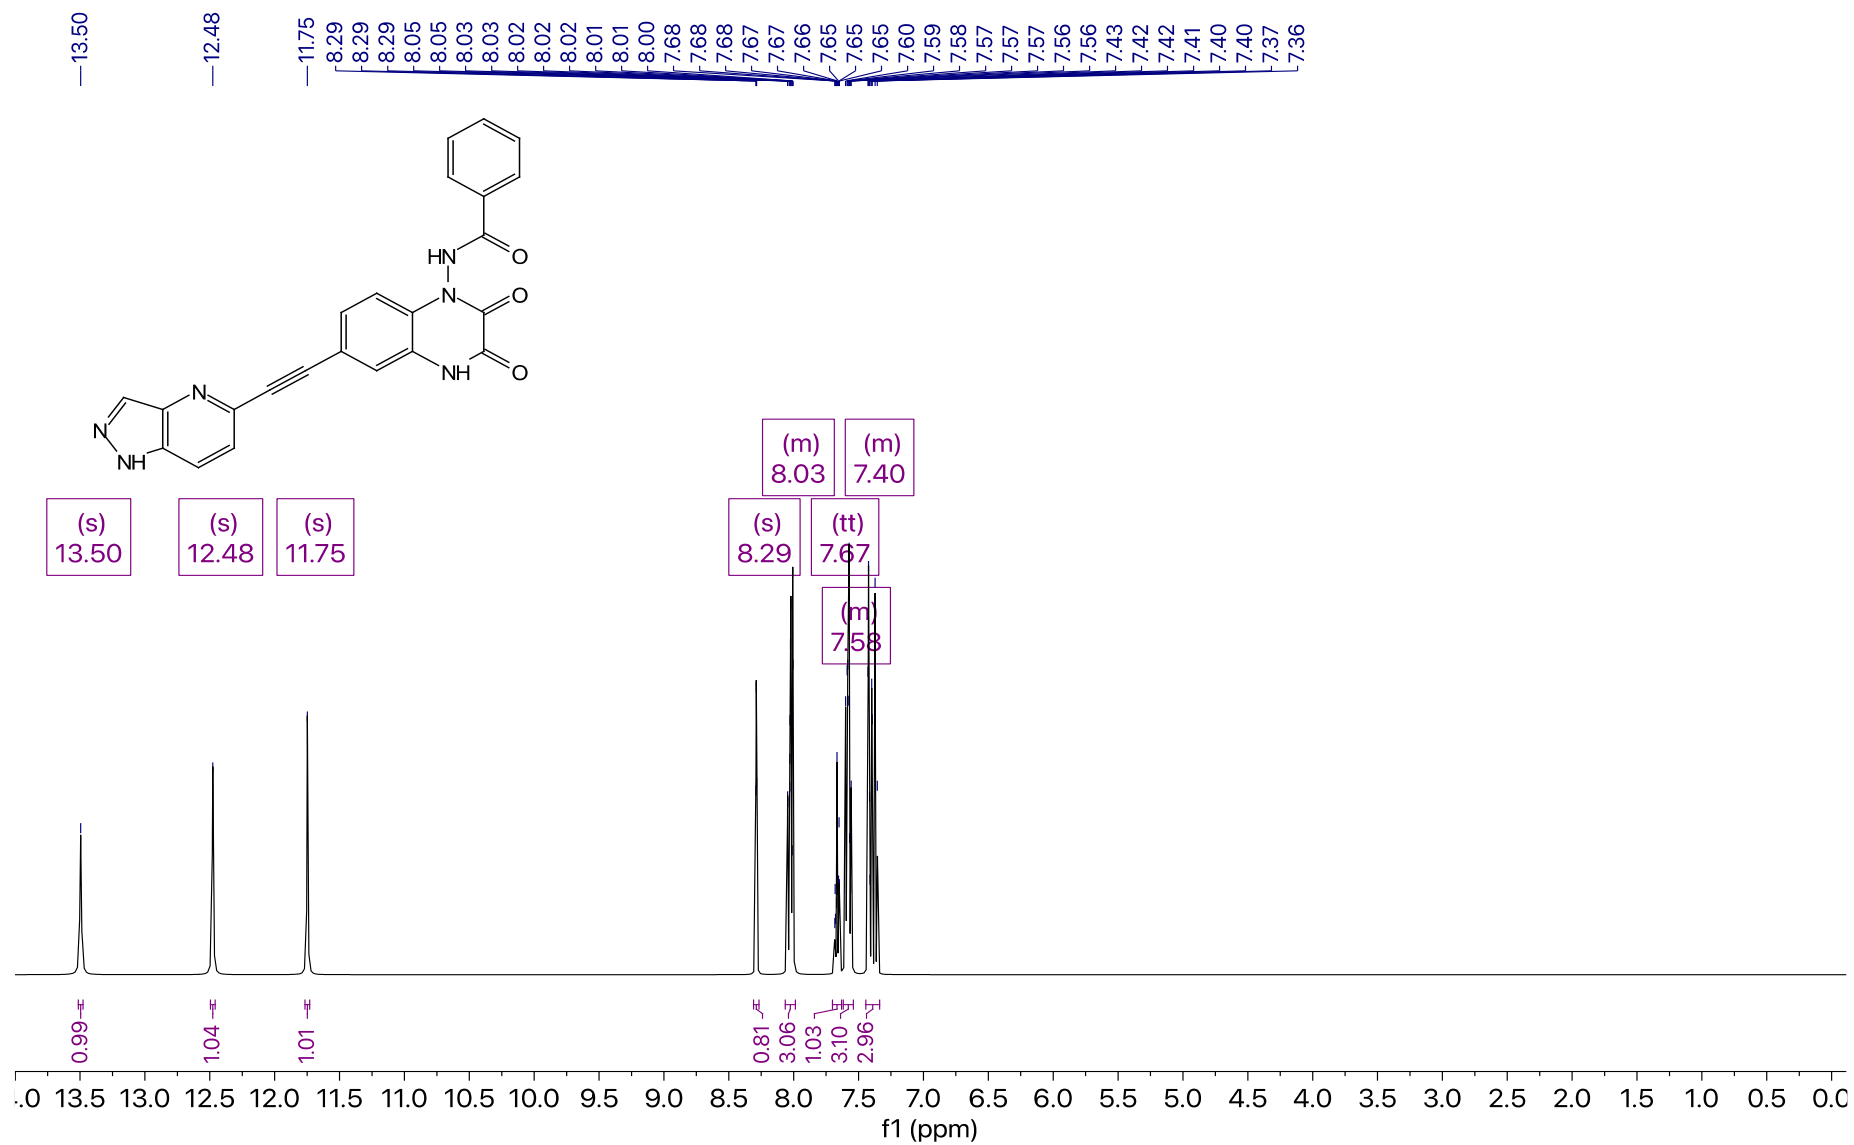

*N*-(6-((1*H*-pyrazolo[4,3-*b*]pyridin-5-yl)ethynyl)-2,3-dioxo-3,4-dihydroquinoxalin-1(2*H*)-yl)benzamide (**29**)

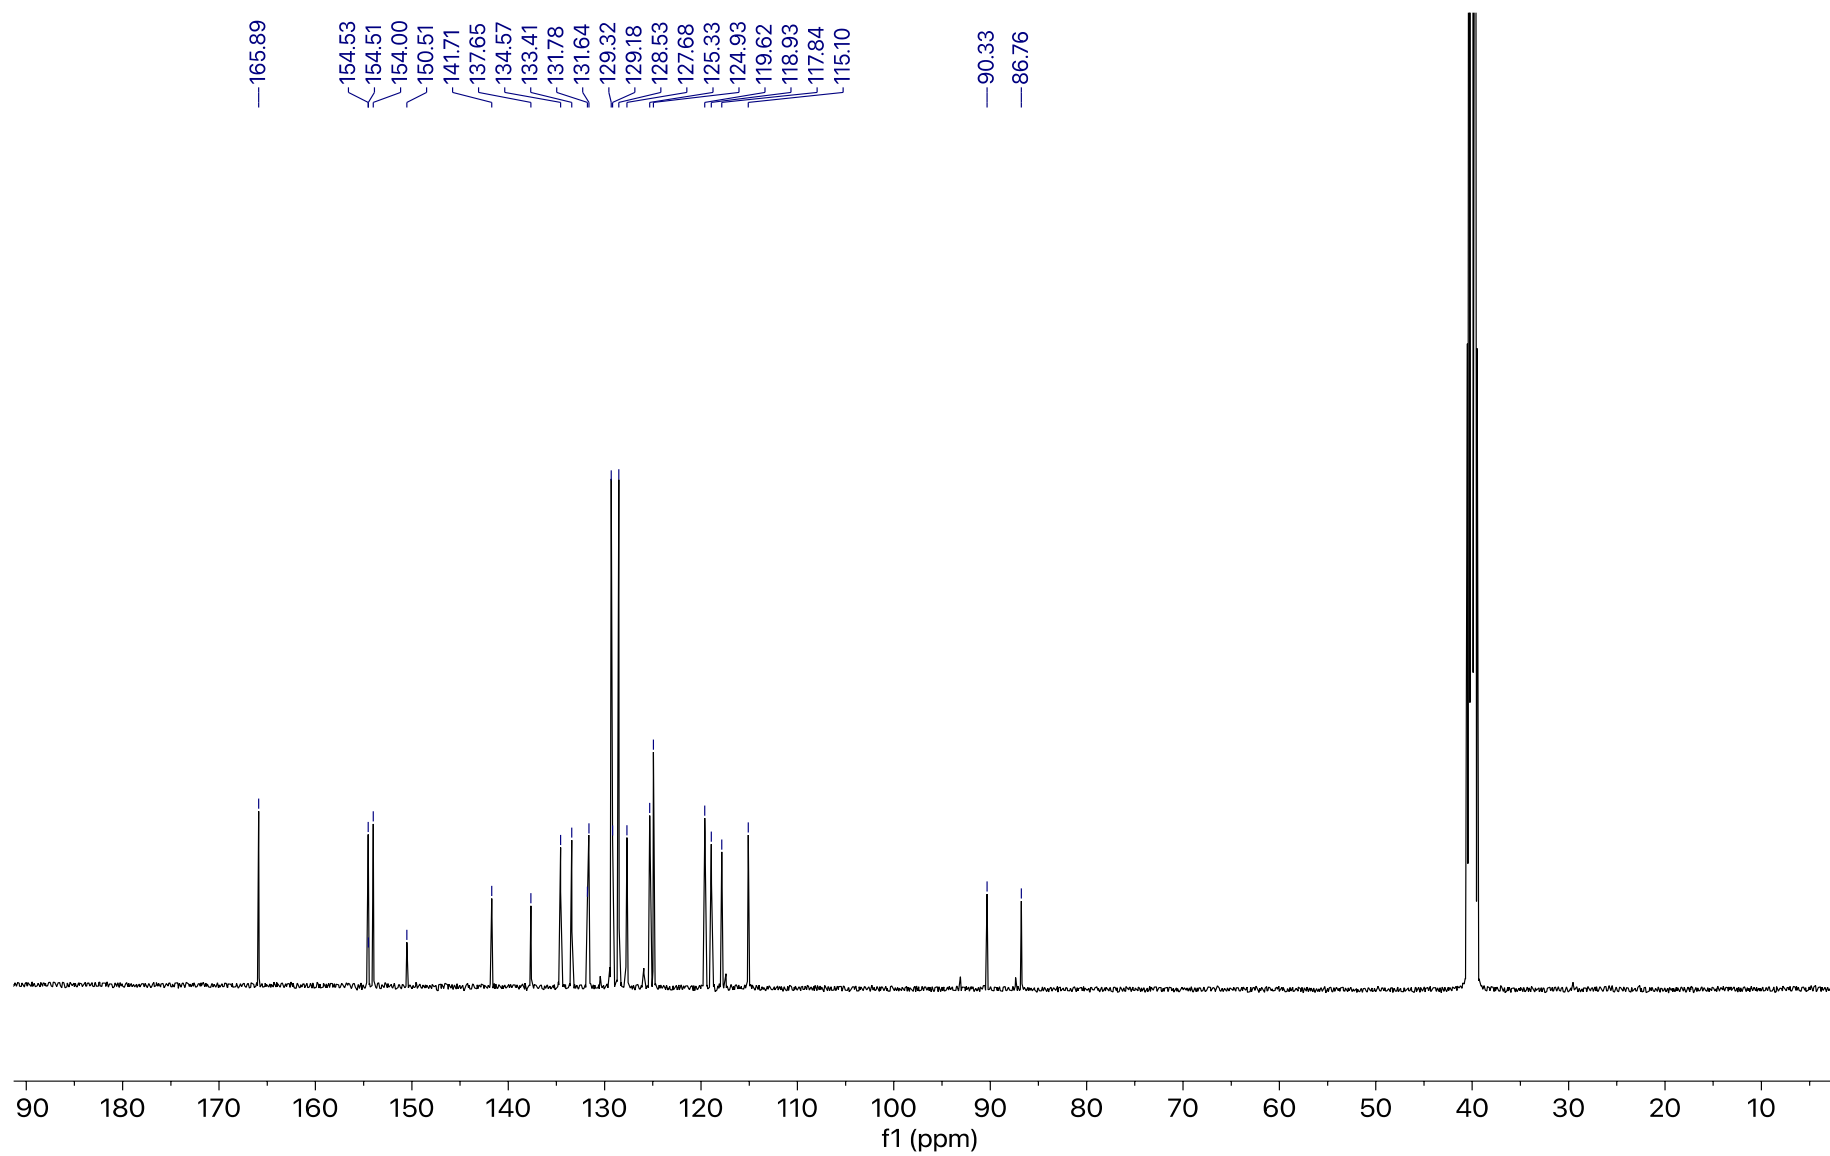

Supplement: s1 [file s1]
